# Supplementary material for: Copper-mediated synthesis of pyrazolo[1,5-a]pyridines through oxidative linkage of C–C/N–N bonds
Source: Royal Society of Chemistry journal article supplement (doi:10.1039/c5ob00018a), 2015-01-01
Supplement: c5ob00018a1.pdf [file c5ob00018a1.pdf]

# Copper-Mediated Synthesis of Pyrazolo[1, 5-a]pyridines Through Oxidative Linkage of C-C/N-N Bonds

Darapaneni Chandra Mohan,<sup>a</sup> Chitrakar Ravi,<sup>a</sup> Sadu Nageswara Rao<sup>a</sup> and  
Subbarayappa Adimurthy\*<sup>a</sup>

<sup>a</sup>Academy of Scientific & Innovative Research, CSIR–Central Salt & Marine Chemicals  
Research Institute, G.B. Marg, Bhavnagar-364 002. Gujarat (INDIA)

E-mail: [adimurthy@csmcri.org](mailto:adimurthy@csmcri.org)

## Table of Contents

|                                                               |         |
|---------------------------------------------------------------|---------|
| Screening of different bases and solvents                     | S2      |
| Experimental Section                                          | S3      |
| General procedure                                             | S3      |
| Characterization data                                         | S4-S17  |
| <sup>1</sup> H & <sup>13</sup> C- NMR Spectra of all products | S18-S46 |
| HRMS Spectra for New compounds                                | S47-S62 |

**Table S1. Screening of Bases<sup>a</sup>**
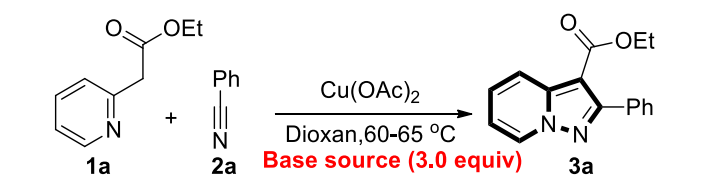

| Entry | Base source       | Yield(%) <sup>(b)</sup> |
|-------|-------------------|-------------------------|
| 1     | DBU               | 19                      |
| 2     | DBN               | 17                      |
| 3     | Pyridine          | 00                      |
| 4     | DABCO             | trace                   |
| 5     | Et <sub>3</sub> N | 00                      |
| 6     | CsCO <sub>3</sub> | 00                      |
| 7     | KOAc              | trace                   |
| 8     | AgCO <sub>3</sub> | trace                   |
| 9     | KOtBu             | 16                      |
| 10    | -                 | trace                   |

<sup>a</sup>Reaction conditions: **1a** (0.3 mmol), **2a** (1.5 mmol), catalyst (0.45 mmol), solvent (1 mL), in an oil bath under nitrogen atmosphere, 6 h. [b] Isolated yield. [nr = no reaction].

**Table S2. Screening of Solvents<sup>a</sup>**
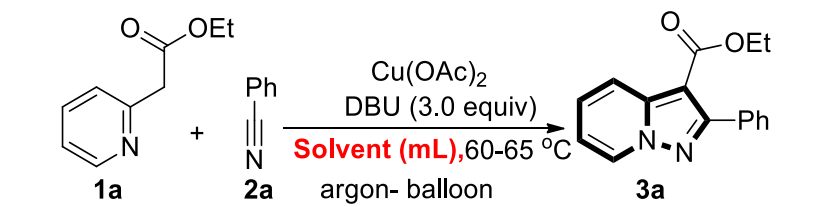

| Entry | Solvent (mL)                          | Yield(%) <sup>(b)</sup> |
|-------|---------------------------------------|-------------------------|
| 1     | THF(1.0)                              | 22                      |
| 2     | CH <sub>3</sub> NO <sub>2</sub> (1.0) | --                      |
| 3     | EDC(1.0)                              | 29                      |
| 4     | 1,2 DCB(1.0)                          | 17                      |
| 5     | toluene(1.0)                          | 12                      |
| 6     | CIPh(1.0)                             | 20                      |
| 7     | EtOH(1.0)                             | 19                      |
| 8     | DMF(1.0)                              | 23                      |
| 9     | DMSO(1.0)                             | 30                      |
| 11    | DMSO(0.25)                            | 33                      |
| 12    | DMSO(0.5)                             | 39                      |
| 13    | 1,3 DCB(0.5)                          | 35                      |

<sup>a</sup>Reaction conditions: **1a** (0.3 mmol), **2a** (1.5 mmol), catalyst (0.3 mmol), Base and solvent , in an oil bath under nitrogen atmosphere, 6 h. [b] Isolated yield. [nr = no reaction].

**General Experimental Section:** All commercially available chemicals and reagents were used without any further purification unless otherwise indicated.  $^1\text{H}$  and  $^{13}\text{C}$  NMR spectra were recorded at 500, and 125 MHz, respectively. The spectra were recorded in  $\text{CDCl}_3$  as solvent. Multiplicity was indicated as follows: s (singlet); d (doublet); t (triplet); m (multiplet); dd (doublet of doublets), etc. and coupling constants (J) was given in Hz. Chemical shifts are reported in ppm relative to TMS as an internal standard. The peaks around delta values of  $^1\text{H}$  NMR (7.2), and  $^{13}\text{C}$  NMR (77.0) are correspond to deuterated solvent chloroform respectively. Mass spectra were obtained using electron impact (EI) ionization method. Progress of the reactions was monitored by thin layer chromatography (TLC). All products were purified through column chromatography using silica gel 100-200 mesh size with hexane/ethyl acetate as eluent unless otherwise indicated.

**Typical procedure for the synthesis of Ethyl 2-phenylpyrazolo [1,5-a]pyridine-3-carboxylate (3a):** 49.5 mg (0.3 mmol) of ethyl 2-(pyridin-2-yl)acetate **1a**, 463.5 mg (4.5 mmol) of Benzonitrile (**2a**),  $\text{Cu}(\text{OAc})_2$  (0.3 mmol),  $\text{CuBr}$  (0.3 mmol), DBU (0.9 mmol) and DMSO (0.5 mL) were placed in a 25-mL double-necked round-bottomed flask. The mixture was heated in an oil bath at 60-65 °C for 6 h under an argon atmosphere (balloon). After completion of the reaction, it was allowed to attain room temperature and then the mixture was purified through column chromatography using silica gel (5 % EtOAc/hexane) to afford **3a**; yield: 49.5 mg (62%).

## Characterization data

### Ethyl 2-phenylpyrazolo [1,5-a]pyridine-3-carboxylate (3a):

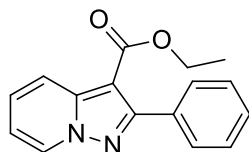

White solid; M.p.68-73°C; <sup>1</sup>H NMR (500 MHz, CDCl<sub>3</sub>) δ 8.45 (d, *J* = 9.0 Hz, 1H), 8.15 (d, *J* = 9.0 Hz, 1H), 7.71-7.70 (m, 2H), 7.39-7.31 (m, 4H), 6.88 (t, *J* = 7.0 Hz, 1H). 4.28 (q, *J* = 7.0 Hz, 2H), 1.23 (t, *J* = 7.0 Hz, 3H). <sup>13</sup>C NMR (125 MHz, CDCl<sub>3</sub>) δ 163.5, 156.9, 142.6, 132.5, 129.9, 128.8, 127.7, 127.2, 119.7, 113.8, 100.7, 59.8, 14.2. HRMS calcd for C<sub>16</sub>H<sub>14</sub>N<sub>2</sub>NaO<sub>2</sub>: 289.0953. Found: 289.0940.

### Isopropyl 2-phenylpyrazolo[1,5-a]pyridine-3-carboxylate (3b)

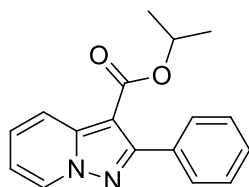

(Eluent: 5% EtOAc/hexane); 53% yield (45 mg); colour less liquid; <sup>1</sup>H NMR (500 MHz, CDCl<sub>3</sub>) δ 8.53 (t, *J* = 7.0 Hz, 1H), 8.22 (d, *J* = 9.0 Hz, 1H), 7.78-7.77 (m, 2H), 7.47-7.38 (m, 4H), 6.94 (t, *J* = 6.5 Hz, 1H), 5.29 (sept, *J* = 6.5 Hz, 1H), 1.29 (d, *J* = 6.0 Hz, 6H). <sup>13</sup>C NMR (125 MHz, CDCl<sub>3</sub>) δ 163.1, 156.9, 142.6, 132.6, 130.0, 128.7, 127.6, 127.0, 119.7, 113.7, 101.1, 67.3, 22.0. HRMS calcd for C<sub>17</sub> H<sub>16</sub> O<sub>2</sub> N<sub>2</sub> Na: 303.1109. Found: 303.1097.

### Butyl 2-phenylpyrazolo[1,5-a]pyridine-3-carboxylate (3c)

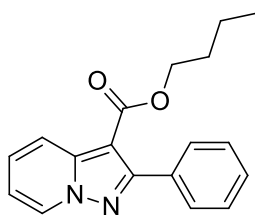

Eluent: 5% EtOAc/hexane); 52% yield (46 mg); White solid; M.p.62-67 °C;  $^1\text{H}$  NMR (500 MHz,  $\text{CDCl}_3$ )  $\delta$  8.53 (d,  $J = 6.5$  Hz, 1H), 8.22 (d,  $J = 9.0$  Hz, 1H), 7.77-7.75 (m, 2H), 7.47-7.39 (m, 4H), 6.95 (t,  $J = 7.0$  Hz, 1H), 4.25 (t,  $J = 7.0$  Hz, 2H), 1.63 (quin,  $J = 7.0$  Hz, 2H), 1.30 (quin,  $J = 7.5$  Hz, 2H), 0.89 (t,  $J = 7.5$  Hz, 3H).  $^{13}\text{C}$  NMR (125 MHz,  $\text{CDCl}_3$ )  $\delta$  163.7, 156.9, 142.7, 132.6, 129.9, 128.8, 128.7, 127.7, 127.2, 119.6, 113.8, 100.8, 63.8, 30.7, 19.2, 13.6. HRMS calcd for  $\text{C}_{18}\text{H}_{19}\text{O}_2\text{N}_2$ : 295.1447. Found: 295.1451.

#### Tert-butyl-2-phenylpyrazolo[1,5-a]pyridine-3-carboxylate (3d)

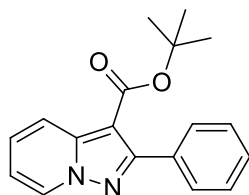

(Eluent: 5% EtOAc/hexane); 62% yield (54.6 mg); White solid; M.p.88-93°C;  $^1\text{H}$  NMR (500 MHz,  $\text{CDCl}_3$ )  $\delta$  8.50 (d,  $J = 6.5$  Hz, 1H), 8.20 (d,  $J = 9.0$  Hz, 1H), 7.74 (d,  $J = 8.0$  Hz, 2H), 7.46-7.36 (m, 4H), 6.92 (t,  $J = 6.5$  Hz, 1H), 1.46 (s, 9H).  $^{13}\text{C}$  NMR (125 MHz,  $\text{CDCl}_3$ )  $\delta$  162.9, 156.7, 142.5, 132.9, 129.9, 128.6, 128.5, 127.6, 126.8, 119.6, 113.5, 102.2, 80.4, 28.3. HRMS calcd for  $\text{C}_{18}\text{H}_{18}\text{O}_2\text{N}_2\text{Na}$ : 317.1266. Found: 317.1270.

#### Cyclohexyl-2-phenylpyrazolo[1,5-a]pyridine-3-carboxylate (3e)

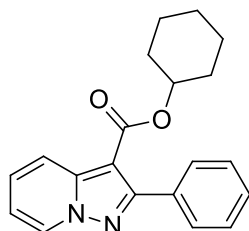

(Eluent: 5% EtOAc/hexane); 60% yield (58 mg); colour less liquid;  $^1\text{H}$  NMR (500 MHz,  $\text{CDCl}_3$ )  $\delta$  8.52 (d,  $J = 6.5$  Hz, 1H), 8.23 (d,  $J = 8.5$  Hz, 1H), 7.78- 7.76 (m, 2H), 7.46-7.38 (m, 4H), 6.94 (t,  $J = 7.0$  Hz, 1H), 5.00 (sept,  $J = 4.0$  Hz, 1H), 1.93-1.89 (m, 2H), 1.65-1.63 (m, 2H), 1.53-1.23 (m, 6H).  $^{13}\text{C}$  NMR (125 MHz,  $\text{CDCl}_3$ )  $\delta$  163.1, 156.9, 142.6, 132.7, 129.7, 128.79, 128.74, 127.7, 127.1, 119.7, 113.7, 101.2, 72.2, 31.7, 25.4, 23.6. HRMS calcd for  $\text{C}_{20}\text{H}_{21}\text{O}_2\text{N}_2$ : 321.1603. Found: 321.1590.

#### Ethyl-2-(p-tolyl)pyrazolo[1,5-a]pyridine-3-carboxylate (4a)

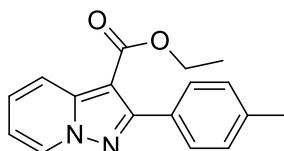

(Eluent: 5% EtOAc/hexane); 32% yield (32 mg); White solid; M.p.90-95°C;  $^1\text{H}$  NMR (500 MHz,  $\text{CDCl}_3$ )  $\delta$  8.52 (d,  $J = 7.0$  Hz, 1H), 8.20 (d,  $J = 9.0$  Hz, 1H), 7.70 (d,  $J = 8.0$  Hz, 2H), 7.40 (t,  $J = 8.0$  Hz, 2H), 7.27-7.25 (m, 2H), 6.94 (t,  $J = 7.0$  Hz, 1H), 4.34 (q,  $J = 7.0$  Hz, 2H), 2.41 (s, 3H), 1.33 (t,  $J = 7.0$  Hz, 3H).  $^{13}\text{C}$  NMR (125 MHz,  $\text{CDCl}_3$ )  $\delta$  162.4, 155.8, 141.4, 137.5, 128.6, 128.3, 127.5, 127.2, 125.8, 118.4, 112.4, 99.4, 58.6, 20.1, 13.1. HRMS calcd for  $\text{C}_{17}\text{H}_{17}\text{O}_2\text{N}_2$ : 281.1290. Found: 281.1297.

#### Ethyl-2-([1,1'-biphenyl]-4-yl)pyrazolo[1,5-a]pyridine-3-carboxylate (4b)

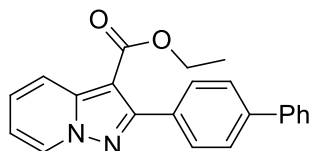

Eluent: 5% EtOAc/hexane); 52% yield (53 mg); White solid; M.p.106-111°C;  $^1\text{H}$  NMR (500 MHz,  $\text{CDCl}_3$ )  $\delta$  8.55 (d,  $J = 7.5$  Hz, 1H), 8.24 (d,  $J = 9.0$  Hz, 1H), 7.92 (d,  $J = 8.0$  Hz, 2H), 7.71-7.61 (m, 4H), 7.49-7.37 (m, 4H), 6.98-6.96 (m, 1H), 4.36 (q,  $J = 7.5$  Hz, 2H), 1.36 (t,  $J = 7.5$  Hz, 3H).  $^{13}\text{C}$  NMR (125 MHz,  $\text{CDCl}_3$ )  $\delta$  163.5, 156.6, 142.6, 141.5, 140.8, 131.4,

130.3, 128.8, 128.7, 127.3, 127.18, 127.13, 126.4, 119.7, 113.8, 100.7, 59.9, 14.3. HRMS calcd for C<sub>22</sub>H<sub>19</sub>O<sub>2</sub>N<sub>2</sub>: 343.1447. Found: 343.1448.

**Ethyl-2-(4-chlorophenyl)pyrazolo[1,5-a]pyridine-3-carboxylate (4c)**

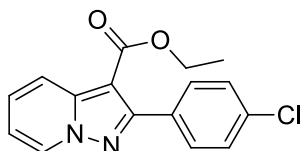

(Eluent: 5% EtOAc/hexane); 63% yield (57 mg); White solid; M.p.124-129°C; <sup>1</sup>H NMR (500 MHz, CDCl<sub>3</sub>) δ 8.51 (d, *J* = 6.5 Hz, 1H), 8.20 (d, *J* = 9.0 Hz, 1H), 7.76 (d, *J* = 8.5 Hz, 2H), 7.43-7.35 (m, 3H), 6.95 (t, *J* = 6.5 Hz, 1H), 4.34 (q, *J* = 7.5 Hz, 2H), 1.33 (t, *J* = 7.0 Hz, 3H). <sup>13</sup>C NMR (125 MHz, CDCl<sub>3</sub>) δ 163.6, 155.6, 142.6, 134.9, 131.3, 130.9, 128.7, 127.9, 127.3, 119.7, 113.9, 100.7, 59.9, 14.2. HRMS calcd for C<sub>16</sub>H<sub>14</sub>ClN<sub>2</sub>O<sub>2</sub>: 301.0744. Found: 301.0744.

**Ethyl-2-(4-bromophenyl)pyrazolo[1,5-a]pyridine-3-carboxylate (4d)**

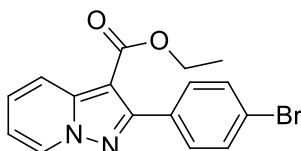

(Eluent: 5% EtOAc/hexane); 63% yield (65 mg); White solid; M.p.119-124°C; <sup>1</sup>H NMR (500 MHz, CDCl<sub>3</sub>) δ 8.52 (d, *J* = 6.5 Hz, 1H), 8.20 (d, *J* = 9.0 Hz, 1H), 7.70 (d, *J* = 7.5 Hz, 2H), 7.59 (d, *J* = 7.5 Hz, 2H) 7.43 (t, *J* = 8.0 Hz, 1H), 6.98 (t, *J* = 7.0 Hz, 1H), 4.33 (q, *J* = 7.0 Hz, 2H), 1.33 (t, *J* = 7.0 Hz, 3H). <sup>13</sup>C NMR (125 MHz, CDCl<sub>3</sub>) δ 163.4, 155.8, 142.7, 131.6, 131.5, 130.9, 128.8, 127.4, 123.3, 119.8, 114.0, 100.7, 60.0, 14.3. HRMS calcd for C<sub>16</sub>H<sub>14</sub>O<sub>2</sub>N<sub>2</sub> Br: 345.0239. Found: 345.0229.

**Ethyl-2-(4-fluorophenyl)pyrazolo[1,5-a]pyridine-3-carboxylate (4e)**

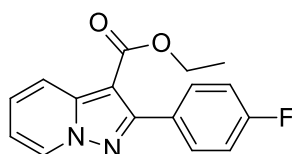

(Eluent: 5% EtOAc/hexane); 62% yield (53 mg); White solid; M.p.90-95°C;  $^1\text{H}$  NMR (500 MHz,  $\text{CDCl}_3$ )  $\delta$  8.51 (d,  $J = 7.0$  Hz, 1H), 8.20 (d,  $J = 9.0$  Hz, 1H), 7.79 (s, 2H), 7.40 (t,  $J = 7.5$  Hz, 1H), 7.13 (t,  $J = 8.0$  Hz, 2H), 6.96 (d,  $J = 6.5$  Hz, 1H), 4.23 (q,  $J = 7.0$  Hz, 2H), 1.32 (t,  $J = 7.0$  Hz, 3H).  $^{13}\text{C}$  NMR (125 MHz,  $\text{CDCl}_3$ )  $\delta$  164.2 (d,  $J = 246.2$  Hz), 163.4, 155.9, 142.6, 131.8, (d,  $J = 8.1$  Hz), 128.7, (d,  $J = 28.5$  Hz), 127.2, 119.7, 114.7, (d,  $J = 21.3$  Hz), 113.8, 100.6, 59.9, 14.2. HRMS calcd for  $\text{C}_{16}\text{H}_{14}\text{O}_2\text{N}_2\text{F}$ : 285.1039. Found: 285.1028.

#### Ethyl-2-(4-(trifluoromethyl)phenyl)pyrazolo[1,5-a]pyridine-3-carboxylate(4f)

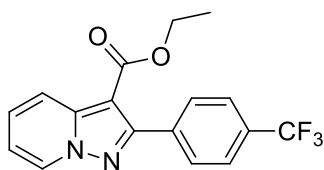

(Eluent: 5% EtOAc/hexane); 70% yield (70.2 mg); White solid; M.p.97-102°C  $^1\text{H}$  NMR (500 MHz,  $\text{CDCl}_3$ )  $\delta$  8.53 (d,  $J = 7.0$  Hz, 1H), 8.23 (d,  $J = 9.0$  Hz, 1H), 7.93 (d,  $J = 7.5$  Hz, 2H), 7.71 (d,  $J = 7.5$  Hz, 2H), 7.44 (t,  $J = 7.5$  Hz, 1H), 6.99 (t,  $J = 6.5$  Hz, 1H), 4.34 (q,  $J = 7.5$  Hz, 2H), 1.32 (t,  $J = 7.5$  Hz, 3H)  $^{13}\text{C}$  NMR (125 MHz,  $\text{CDCl}_3$ )  $\delta$  163.2, 155.4, 142.5, 136.2, 130.7 (d  $J = 111$  Hz), 128.8, 127.5 (d  $J = 51.5$  Hz), 124.8 (d  $J = 81$  Hz), 119.8, 114.2, 100.9, 60.0, 14.2. HRMS calcd for  $\text{C}_{17}\text{H}_{14}\text{O}_2\text{N}_2\text{F}_3$ : 335.1007. Found: 335.1011.

#### Ethyl-2-(4-(methoxycarbonyl)phenyl)pyrazolo[1,5-a]pyridine-3-carboxylate (4g)

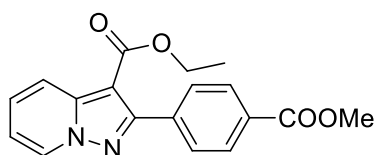



(Eluent: 5% EtOAc/hexane); 62% yield (60.5 mg); White solid; M.p.128-133°C <sup>1</sup>H NMR (500 MHz, CDCl<sub>3</sub>) δ 8.54 (d, *J* = 7.5 Hz, 1H), 8.25 (d, *J* = 9.0 Hz, 1H), 8.13 (d, *J* = 9.0 Hz, 2H), 7.88 (d, *J* = 8.5 Hz, 2H), 7.45 (t, *J* = 7.0 Hz, 1H), 7.00 (t, *J* = 6.5 Hz, 1H), 4.34 (q, *J* = 7.0 Hz, 2H), 3.95 (s, 3H), 1.30 (t, *J* = 7.0 Hz, 3H) <sup>13</sup>C NMR (125 MHz, CDCl<sub>3</sub>) δ 167.0, 163.3, 155.8, 142.7, 137.2, 130.2, 130.1, 129.0, 128.9, 127.4, 119.8, 114.1, 101.1, 60.0, 52.1, 14.2. HRMS calcd for C<sub>18</sub>H<sub>17</sub>O<sub>4</sub>N<sub>2</sub>: 325.1188. Found: 325.1191.

**Ethyl-2-(2-chlorophenyl)pyrazolo[1,5-a]pyridine-3-carboxylate(4j)**

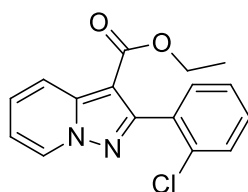

(Eluent: 5% EtOAc/hexane); 61% yield (55 mg); White solid; M.p.102-107°C; <sup>1</sup>H NMR (500 MHz, CDCl<sub>3</sub>) δ 8.53 (d, *J* = 7.0 Hz, 1H), 8.23 (d, *J* = 9.0 Hz, 1H), 7.48-7.32 (m, 5H), 6.97 (t, *J* = 7.0 Hz, 1H), 4.22 (q, *J* = 7.0 Hz, 2H), 1.13 (t, *J* = 7.0 Hz, 3H). <sup>13</sup>C NMR (125 MHz, CDCl<sub>3</sub>) δ 163.1, 154.4, 141.8, 134.1, 132.7, 131.2, 129.8, 129.1, 128.9, 127.3, 126.2, 119.4, 113.9, 102.7, 59.8, 13.9 HRMS calcd for C<sub>16</sub>H<sub>14</sub>ClN<sub>2</sub>O<sub>2</sub>: 301.0744. Found: 301.0744.

**Ethyl-2-(3-bromophenyl)pyrazolo[1,5-a]pyridine-3-carboxylate (4k)**

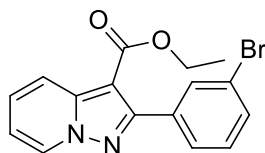

(Eluent: 5% EtOAc/hexane); 51% yield (52.5 mg); White solid; M.p.120-125°C; <sup>1</sup>H NMR (500 MHz, CDCl<sub>3</sub>) δ 8.53 (d, *J* = 7.0 Hz, 1H), 8.24 (d, *J* = 9.0 Hz, 1H), 7.96-7.95 (m, 1H), 7.74 (d, *J* = 8.0 Hz, 1H), 7.57-7.56 (m, 1H), 7.45 (d, *J* = 6.5 Hz, 1H), 7.34 (t, *J* = 7.0 Hz, 1H), 7.00-6.95 (m, 1H), 4.34 (q, *J* = 7.0 Hz, 2H), 1.34 (t, *J* = 7.0 Hz, 3H). <sup>13</sup>C NMR (125 MHz,

CDCl<sub>3</sub>)  $\delta$  163.3, 155.2, 142.7, 134.6, 133.0, 131.8, 129.2, 128.8, 128.7, 127.4, 121.7, 119.8, 114.1, 100.9, 60.0, 14.2. HRMS calcd for C<sub>16</sub>H<sub>14</sub>O<sub>2</sub>N<sub>2</sub>Br: 345.0239. Found: 345.0243.

**Ethyl-2-(3-chlorophenyl)pyrazolo[1,5-a]pyridine-3-carboxylate (4l)**

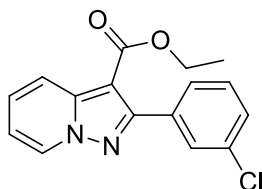

(Eluent: 5% EtOAc/hexane); 58% yield (52.6 mg); White solid; M.p.128-133°C; <sup>1</sup>H NMR (500 MHz, CDCl<sub>3</sub>)  $\delta$  8.53 (d, *J* = 6.5 Hz, 1H), 8.24 (d, *J* = 9.0 Hz, 1H), 7.806-7.802 (m 1H), 7.70-7.68 (m, 1H), 7.45-7.37 (m, 3), 7.00-6.98 (m, 1H), 4.34 (q, *J* = 7.0 Hz, 2H), 1.32 (t, *J* = 7.0 Hz, 3H). <sup>13</sup>C NMR (125 MHz, CDCl<sub>3</sub>)  $\delta$  163.3, 155.3, 142.7, 134.3, 133.5, 130.1, 128.9, 128.88, 128.84, 128.2, 127.4, 119.8, 114.1, 100.9, 60.0, 14.2. HRMS calcd for C<sub>16</sub>H<sub>14</sub>ClN<sub>2</sub>O<sub>2</sub>: 301.0744. Found: 301.0747.

**Ethyl-2-(3-fluorophenyl)pyrazolo[1,5-a]pyridine-3-carboxylate (4m)**

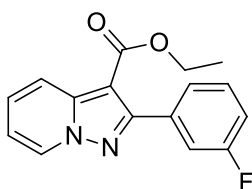

(Eluent: 5% EtOAc/hexane); 61% yield (52 mg); White solid; M.p.116-121°C; <sup>1</sup>H NMR (500 MHz, CDCl<sub>3</sub>)  $\delta$  8.52 (d, *J* = 7.0 Hz, 1H), 8.23 (d, *J* = 9.0 Hz, 1H), 7.60 (d, *J* = 7.5 Hz, 1H), 7.54 (d, *J* = 10.0 Hz, 1H), 7.44-7.39 (m, 2H), 7.15-7.11 (m, 1H), 6.99 (t, *J* = 6.5 Hz, 1H), 4.35 (q, *J* = 7.0 Hz, 2H), 1.33 (t, *J* = 7.0 Hz, 3H). <sup>13</sup>C NMR (125 MHz, CDCl<sub>3</sub>)  $\delta$  163.3, (d, *J* = 20.6 Hz), 161.2, 155.5, 142.7, 134.6, (d, *J* = 8.1 Hz), 129.2, (d, *J* = 8.1 Hz), 128.8, 127.3, 125.7, 119.8, 117.2, (d, *J* = 22.8 Hz), 115.7, (d, *J* = 21.0 Hz), 114.0, 100.8, 59.9, 14.1. HRMS calcd for C<sub>16</sub>H<sub>14</sub>O<sub>2</sub>N<sub>2</sub>F: 285.1039. Found: 285.1032.

**Butyl-2-(2-chlorophenyl)pyrazolo[1,5-a]pyridine-3-carboxylate (4n)**

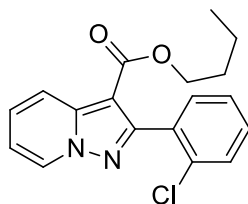

(Eluent: 5% EtOAc/hexane); 60% yield (52.0 mg); White solid; M.p.78-83°C; <sup>1</sup>H NMR (500 MHz, CDCl<sub>3</sub>) δ 8.54 (d, *J* = 7.0 Hz, 1H), 8.25 (d, *J* = 9.0 Hz, 1H), 7.49-7.43 (m, 3H), 7.40-7.33 (m, 2H), 6.99 (t, *J* = 7.0 Hz, 1H), 4.15 (t, *J* = 7.5 Hz, 2H), 1.46 (quin, *J* = 6,5 Hz 2H), 1.13 (sextet, *J* = 7.5 Hz, 2H), 0.82 (t, *J* = 7.5 Hz, 3H). <sup>13</sup>C NMR (125 MHz, CDCl<sub>3</sub>) δ 163.3, 154.2, 141.9, 134.1, 132.8, 131.1, 129.8, 129.1, 128.9, 127.3, 126.2, 119.4, 113.9, 102.7, 63.7, 30.5, 19.0, 13.6, HRMS calcd for C<sub>18</sub> H<sub>18</sub> O<sub>2</sub> N<sub>2</sub> Cl: 329.1057. Found: 329.10565.

**Tert-butyl-2-(4-bromophenyl)pyrazolo[1,5-a]pyridine-3-carboxylate (4o)**

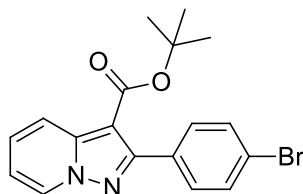

(Eluent: 5% EtOAc/hexane); 60% yield (67.0 mg); White solid; M.p.116-121°C ; <sup>1</sup>H NMR (500 MHz, CDCl<sub>3</sub>) δ 8.50 (d, *J* = 7.0 Hz, 1H), 8.19 (d, *J* = 9.0 Hz, 1H), 7.66 (d, *J* = 8.5 Hz, 2H), 7.59 (d, *J* = 8.0 Hz, 2H), 7.39 (t, *J* = 8.0 Hz, 1H), 6.95 (t, *J* = 7.0 Hz, 1H), 1.52 (s, 9H). <sup>13</sup>C NMR (125 MHz, CDCl<sub>3</sub>) δ 162.7, 155.6, 142.5, 131.8, 131.6, 130.8, 128.7, 127.0, 123.1, 119.7, 113.8, 80.7, 28.4. HRMS calcd for C<sub>18</sub> H<sub>18</sub> O<sub>2</sub> N<sub>2</sub> Br: 373.0552. Found: 373.0557.

**Cyclohexyl-2-(4-(methoxycarbonyl)phenyl)pyrazolo[1,5-a]pyridine-3-carboxylate (4p)**

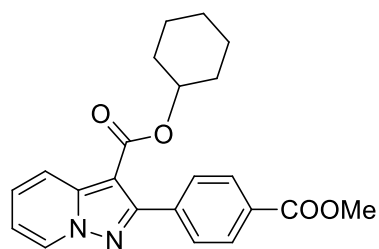

(Eluent: 5% EtOAc/hexane); 72% yield (80.5 mg); White solid; M.p.121-126°C; <sup>1</sup>H NMR (500 MHz, CDCl<sub>3</sub>) δ 8.52 (d, *J* = 7.0 Hz, 1H), 8.23 (d, *J* = 9.0 Hz, 1H), 8.12 (d, *J* = 8.5 Hz, 2H), 7.86 (d, *J* = 8.5 Hz, 2H), 7.41 (t, *J* = 7.5 Hz, 1H), 6.96 (t, *J* = 7.0 Hz, 1H), 4.97 (sept, *J* = 5.0 Hz, 1H), 3.90 (s, 3H), 1.91-1.89 (m, 2H), 1.65-1.62 (m, 2H), 1.52-1.21(m, 6H). <sup>13</sup>C NMR (125 MHz, CDCl<sub>3</sub>) δ 165.7, 161.8, 154.4, 141.4, 136.1, 128.9, 128.8, 127.7, 127.5, 126.5, 118.6, 112.8, 100.2, 71.3, 50.9, 30.5, 24.1, 22.5. HRMS calcd for C<sub>22</sub>H<sub>23</sub>N<sub>2</sub>O<sub>4</sub>: 379.1658. Found: 379.1650.

**Tert-butyl-2-(4-(trifluoromethyl)phenyl)pyrazolo[1,5-a]pyridine-3-carboxylate (4q)**

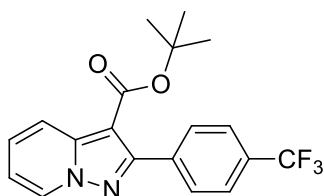

(Eluent: 5% EtOAc/hexane); 79% yield (85.5 mg); White solid; M.p.119-124°C; <sup>1</sup>H NMR (500 MHz, CDCl<sub>3</sub>) δ 8.51 (d, *J* = 7.0 Hz, 1H), 8.21 (d, *J* = 9.0 Hz, 1H), 7.89 (d, *J* = 8.0 Hz, 2H), 7.72 (d, *J* = 8.0 Hz, 2H), 7.41 (t, *J* = 7.5 Hz, 1H), 6.69 (t, *J* = 6.5 Hz, 1H), 1.51 (s, 9H). <sup>13</sup>C NMR (125 MHz, CDCl<sub>3</sub>) δ 162.6, 155.2, 142.4, 136.9, 130.7(d *J* = 162 Hz), 128.7, 127.7(d *J* = 56.6 Hz), 124.8(d *J* = 86.0 Hz), 119.8, 113.9, 102.5, 80.8, 28.3. HRMS calcd for C<sub>19</sub> H<sub>18</sub> O<sub>2</sub> N<sub>2</sub> F<sub>3</sub>: 363.1320. Found: 363.1326.

**Cyclohexyl-2-([1,1'-biphenyl]-4-yl)pyrazolo[1,5-a]pyridine-3-carboxylate (4r)**

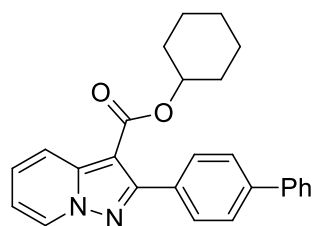

Eluent: 5% EtOAc/hexane); 59% yield (70 mg); White solid; M.p.143-148°C; <sup>1</sup>H NMR (500 MHz, CDCl<sub>3</sub>) δ 8.54 (d, *J* = 7.0 Hz, 1H), 8.24 (d, *J* = 9.0 Hz, 1H), 7.89 (d, *J* = 8.0 Hz, 2H), 7.69-7.65 (m, 4H), 7.47-7.35 (m, 4H), 6.95 (t, *J* = 6.5 Hz, 1H), 5.03 (sept, *J* = 4.0 Hz, 1H), 1.95-1.92 (m, 2H), 1.68-1.65 (m, 2H), 1.55-1.50 (m, 3H), 1.41-1.35 (m, 2H), 1.28-1.25 (m, 1H). <sup>13</sup>C NMR (125 MHz, CDCl<sub>3</sub>) δ 163.1, 142.7, 141.5, 140.9, 131.7, 130.4, 128.8, 128.7, 127.4, 127.2, 126.5, 119.8, 113.8, 101.2, 72.3, 31.8, 25.4, 23.7, HRMS calcd for C<sub>26</sub> H<sub>25</sub> O<sub>2</sub> N<sub>2</sub>: 397.1916. Found: 397.1922.

**Cyclohexyl-2-(4-(trifluoromethyl)phenyl)pyrazolo[1,5-a]pyridine-3-carboxylate (4s)**

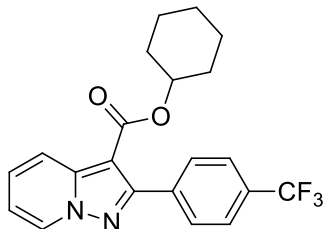

(Eluent: 5% EtOAc/hexane); 68% yield (79.5 mg); White solid; M.p.66-71°C; <sup>1</sup>H NMR (500 MHz, CDCl<sub>3</sub>) δ 8.53 (d, *J* = 7.0 Hz, 1H), 8.24 (d, *J* = 8.5 Hz, 1H), 7.92 (d, *J* = 8.0 Hz, 2H), 7.72 (d, *J* = 8.5 Hz, 2H), 7.46 (t, *J* = 7.0 Hz, 1H), 7.01 (t, *J* = 6.5 Hz, 1H), 5.00 (sept, *J* = 5.0 Hz, 1H), 1.94-1.90 (m, 2H), 1.65-1.63 (m, 2H), 1.52-1.26 (m, 6H). <sup>13</sup>C NMR (125 MHz, CDCl<sub>3</sub>) δ 162.8, 155.4, 142.5, 136.4, 130.5, 130.5(d *J* = 72.5 Hz), 128.8, 127.4, 124.8(d *J* = 86.5 Hz), 119.9, 114.1, 101.5, 72.5, 31.7, 25.3, 23.6. HRMS calcd for C<sub>21</sub> H<sub>20</sub> O<sub>2</sub> N<sub>2</sub> F<sub>3</sub>: 389.1477. Found: 389.1489.

**Tert-butyl-2-(4-fluorophenyl)pyrazolo[1,5-a]pyridine-3-carboxylate (4t)**

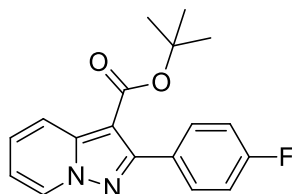

(Eluent: 5% EtOAc/hexane); 79% yield (74 mg); White solid; M.p.132-137°C;  $^1\text{H}$  NMR (500 MHz,  $\text{CDCl}_3$ )  $\delta$  8.50 (d,  $J = 7.0$  Hz, 1H), 8.20 (d,  $J = 9.0$  Hz, 1H), 7.76-7.73 (m, 2H), 7.39 (t,  $J = 8.5$  Hz, 1H), 7.14 (t,  $J = 8.5$  Hz, 2H), 6.94 (t,  $J = 7.0$  Hz, 1H), 1.52 (s, 9H).  $^{13}\text{C}$  NMR (125 MHz,  $\text{CDCl}_3$ )  $\delta$  164.1, (d,  $J = 246.2$  Hz), 162.9, 155.8, 142.5, 131.9, (d,  $J = 8.2$  Hz), 128.9, (d,  $J = 28.2$  Hz), 127.0, 119.7, 114.8, (d,  $J = 21.3$  Hz), 113.7, 102.1, 80.7, 28.4. HRMS calcd for  $\text{C}_{18}\text{H}_{18}\text{O}_2\text{N}_2\text{F}$ : 313.1352. Found: 313.1368.

**Tert-butyl-2-(3-fluorophenyl)pyrazolo[1,5-a]pyridine-3-carboxylate (4u)**

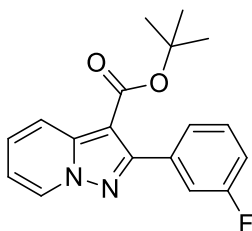

(Eluent: 5% EtOAc/hexane); 82% yield (76.5 mg); White solid; M.p.118-123°C;  $^1\text{H}$  NMR (500 MHz,  $\text{CDCl}_3$ )  $\delta$  8.51 (d,  $J = 7.0$  Hz, 1H), 8.22 (d,  $J = 9.0$  Hz, 1H), 7.55 (d,  $J = 7.5$  Hz, 1H), 7.44-7.39 (m, 3H), 7.14-7.11 (m, 1H), 6.96 (t,  $J = 6.5$  Hz, 1H), 1.51 (s, 9H).  $^{13}\text{C}$  NMR (125 MHz,  $\text{CDCl}_3$ )  $\delta$  163.1 (d,  $J = 118.2$  Hz), 162.7, 155.3, 142.6, 135.0 (d,  $J = 8.5$  Hz), 129.2 (d,  $J = 8.1$  Hz), 128.7, 127.1, 125.7, 119.8, 117.3(d,  $J = 22.6$  Hz), 115.6 (d,  $J = 21$  Hz), 113.9, 102.3, 80.7, 28.3. HRMS calcd for  $\text{C}_{18}\text{H}_{18}\text{O}_2\text{N}_2\text{F}$ : 313.1352. Found: 313.1368.

**Ethyl-2-(pyridin-3-yl)pyrazolo[1,5-a]pyridine-3-carboxylate (4v)**

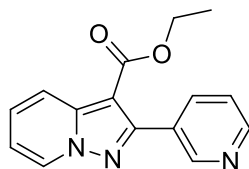

(Eluent: EtOAc); 72% yield (57.5 mg); White solid; M.p.138-143°C;  $^1\text{H}$  NMR (500 MHz,  $\text{CDCl}_3$ )  $\delta$  9.01-9.00 (m, 1H), 8.68-8.66 (m, 1H), 8.55 (d,  $J = 7.0$  Hz, 1H), 8.25 (d,  $J = 7.0$  Hz, 1H), 8.15-8.12 (m, 1H), 7.45 (t,  $J = 7.0$  Hz, 1H), 7.40-7.38 (m, 1H), 7.01 (t,  $J = 7.0$  Hz, 1H), 4.33 (quar,  $J = 7.0$  Hz, 2H), 1.31 (t,  $J = 7.0$  Hz, 3H).  $^{13}\text{C}$  NMR (125 MHz,  $\text{CDCl}_3$ )  $\delta$  163.2, 153.7, 150.5, 149.6, 142.7, 137.4, 128.8, 128.7, 127.5, 122.5, 119.8, 114.2, 101.2, 60.0, 14.2. HRMS calcd for  $\text{C}_{15}\text{H}_{14}\text{O}_2\text{N}_3$ : 268.1086. Found: 268.1081.

**Ethyl-2-(pyridin-4-yl)pyrazolo[1,5-a]pyridine-3-carboxylate (4w)**

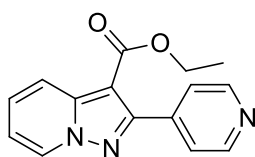

(Eluent: EtOAc); 81% yield (66 mg); White solid; M.p.154-159°C;  $^1\text{H}$  NMR (500 MHz,  $\text{CDCl}_3$ )  $\delta$  8.72 (d,  $J = 5.5$  Hz, 2H), 8.55 (d,  $J = 7.0$  Hz, 1H), 8.25 (d,  $J = 9.0$  Hz, 1H), 7.75 (d,  $J = 5.5$  Hz, 2H), 7.46 (t,  $J = 7.5$  Hz, 1H), 7.02 (t,  $J = 6.5$  Hz, 1H), 4.35 (q,  $J = 7.0$  Hz, 2H), 1.33 (t,  $J = 7.0$  Hz, 3H).  $^{13}\text{C}$  NMR (125 MHz,  $\text{CDCl}_3$ )  $\delta$  163.1, 154.1, 149.3, 142.6, 140.5, 128.5, 127.6, 124.4, 119.9, 114.2, 101.2, 60.2, 14.2. HRMS calcd for  $\text{C}_{15}\text{H}_{14}\text{O}_2\text{N}_3$ : 268.1086. Found: 268.1075.

**Cyclohexyl-2-(pyridin-3-yl)pyrazolo[1,5-a]pyridine-3-carboxylate (4x)**

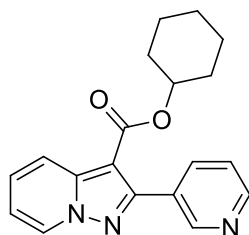

(Eluent: EtOAc); 74% yield (71.5 mg); liquid:  $^1\text{H}$  NMR (500 MHz,  $\text{CDCl}_3$ )  $\delta$  8.99 (s, 1H), 8.67 (d,  $J = 4.5$  Hz, 1H), 8.55 (d,  $J = 6.5$  Hz, 1H), 8.26 (d,  $J = 8.5$  Hz, 1H), 8.14 (d,  $J = 7.5$  Hz, 1H), 7.46-7.38 (m, 2H), 7.00 (t,  $J = 7.0$  Hz, 1H), 4.99 (sept,  $J = 5.0$  Hz, 1H), 1.99 (s, 2H), 1.65-1.25 (m, 8H).  $^{13}\text{C}$  NMR (125 MHz,  $\text{CDCl}_3$ )  $\delta$  162.7, 153.5, 150.4, 149.4, 142.5, 137.3, 128.8, 128.7, 127.4, 122.4, 119.7, 144.1, 101.5, 72.5, 31.6, 25.2, 23.6. HRMS calcd for  $\text{C}_{19}\text{H}_{20}\text{O}_2\text{N}_3$ : 322.1556. Found: 322.1566.

#### Cyclohexyl-2-(pyridin-4-yl)pyrazolo[1,5-a]pyridine-3-carboxylate (4y)

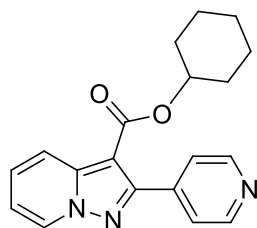

(Eluent: EtOAc); 84% yield (81 mg); White solid; M.p.98-103°C;  $^1\text{H}$  NMR (500 MHz,  $\text{CDCl}_3$ )  $\delta$  8.76 (d,  $J = 5.0$  Hz, 2H), 8.56 (d,  $J = 7.0$  Hz, 1H), 8.28 (d,  $J = 9.0$  Hz, 1H), 7.76 (d,  $J = 5.5$  Hz, 2H), 7.48 (t,  $J = 7.5$  Hz, 1H), 7.03 (t,  $J = 7.0$  Hz, 1H), 5.03 (sept,  $J = 5.0$  Hz, 1H), 1.97-1.96 (m, 2H), 1.70-1.68 (m, 2H), 1.58-1.27 (m, 6H).  $^{13}\text{C}$  NMR (125 MHz,  $\text{CDCl}_3$ )  $\delta$  162.6, 154.0, 149.2, 142.6, 140.6, 128.8, 127.4, 124.4, 119.9, 114.3, 101.6, 72.7, 31.7, 25.2, 23.6. HRMS calcd for  $\text{C}_{19}\text{H}_{20}\text{O}_2\text{N}_3$ : 322.1556. Found: 322.1555.

#### Butyl-2-(thiophen-2-yl)pyrazolo[1,5-a]pyridine-3-carboxylate (4z)

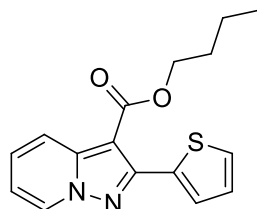

(Eluent: 5% EtOAc/hexane); 37% yield (32 mg); White solid; M.p.68-73°C;  $^1\text{H}$  NMR (500 MHz,  $\text{CDCl}_3$ )  $\delta$  8.50 (d,  $J = 7.0$  Hz, 1H), 8.18-8.15 (m, 2H), 7.43-7.37 (m, 2H), 7.15 (t,  $J =$



5.5 Hz, 1H), 6.94 (t,  $J = 7.0$  Hz, 1H), 4.37 (t,  $J = 7.0$  Hz, 2H), 1.79 (quin,  $J = 7.0$  Hz 2H), 1.51-1.41 (m, 2H), 0.98 (t,  $J = 7.0$  Hz, 3H)..  $^{13}\text{C}$  NMR (125 MHz,  $\text{CDCl}_3$ )  $\delta$  163.5, 150.4, 142.8, 133.8, 130.4, 128.6, 127.47, 127.42, 119.7, 113.9, 100.0, 64.0, 30.8, 19.3, 13.7. HRMS calcd for  $\text{C}_{16}\text{H}_{17}\text{O}_2\text{N}_2\text{S}$ : 301.1011. Found: 301.1001.

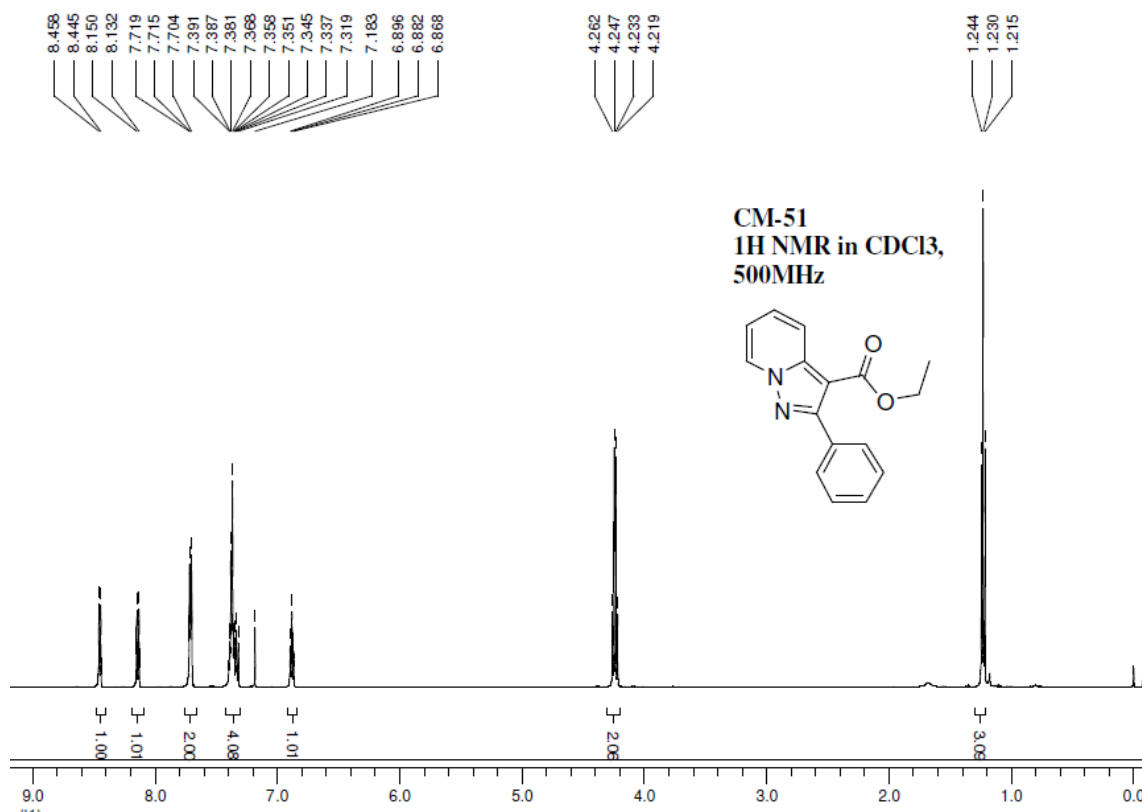

<sup>1</sup>H NMR of **3a**

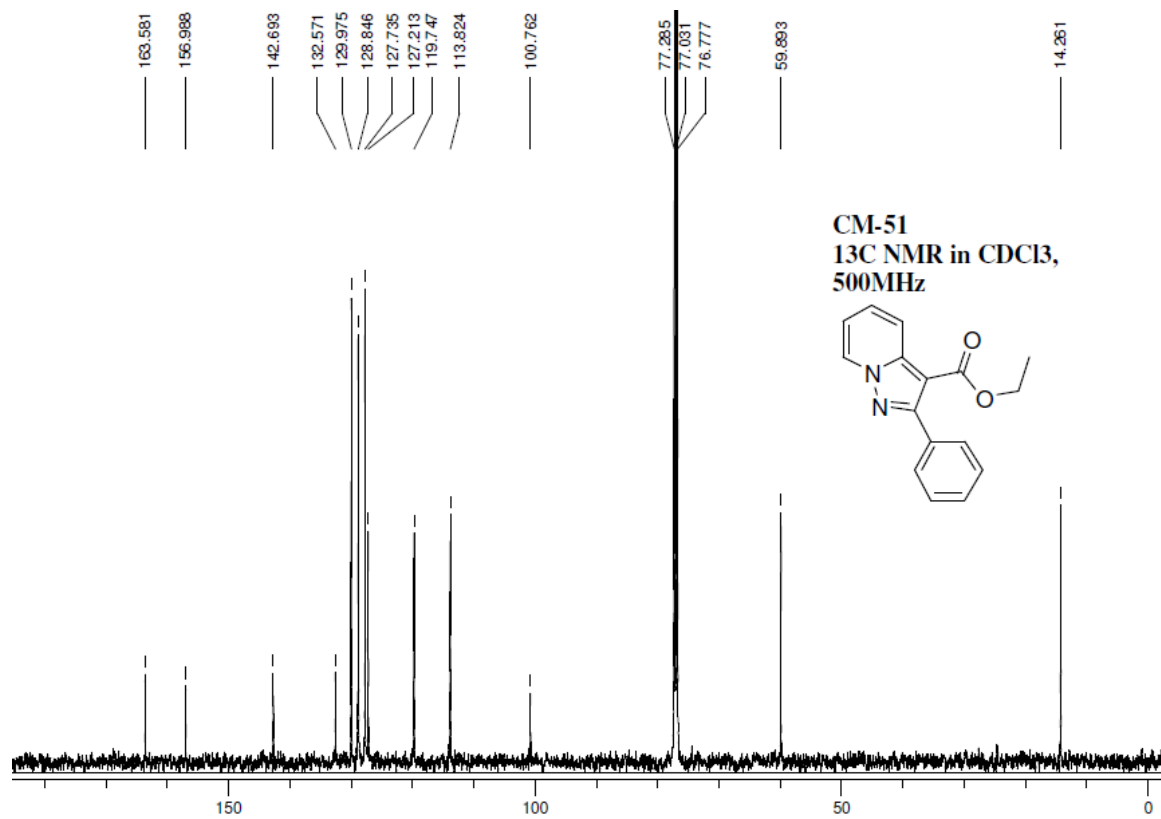

<sup>13</sup>C NMR of **3a**

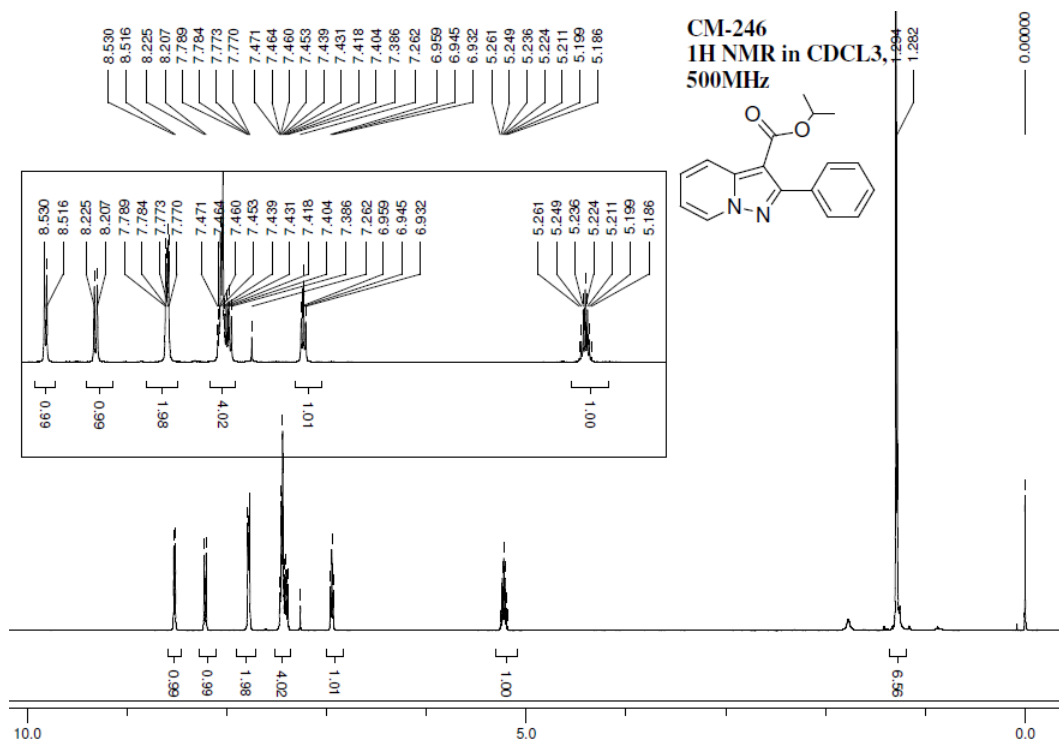

<sup>1</sup>H NMR of **3b**

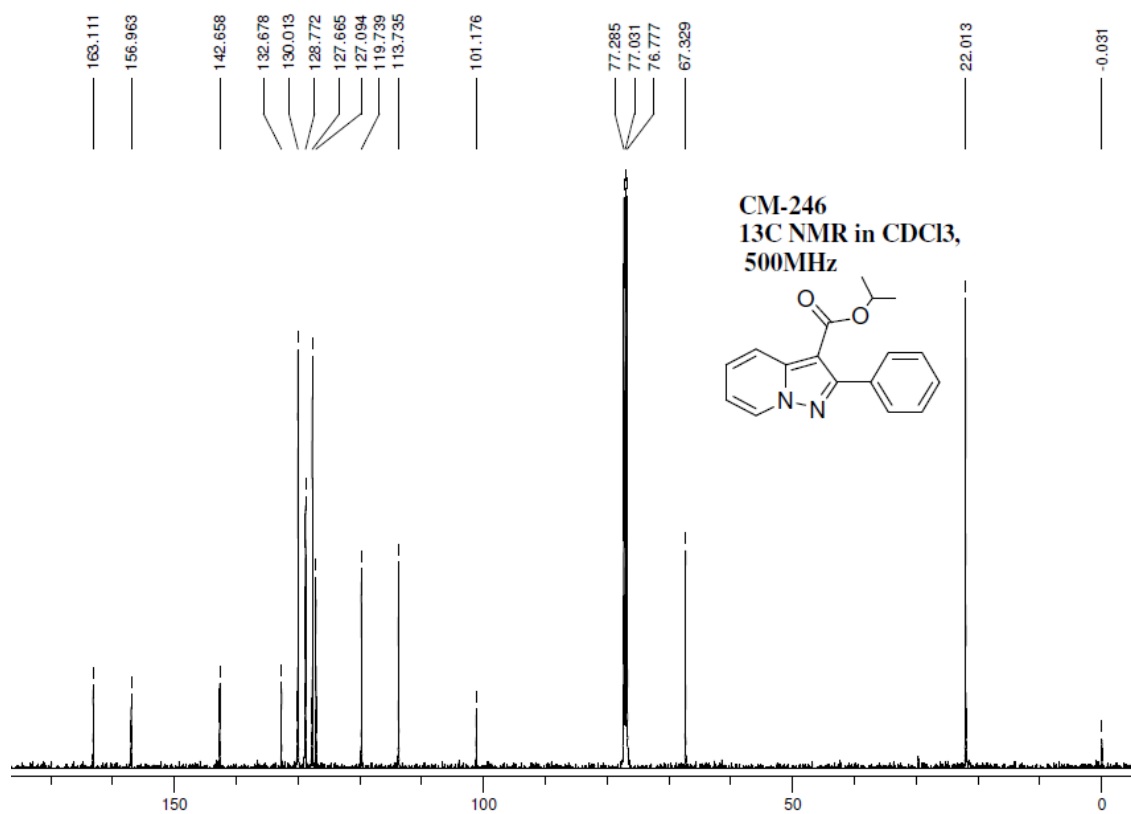

<sup>13</sup>C NMR of **3b**

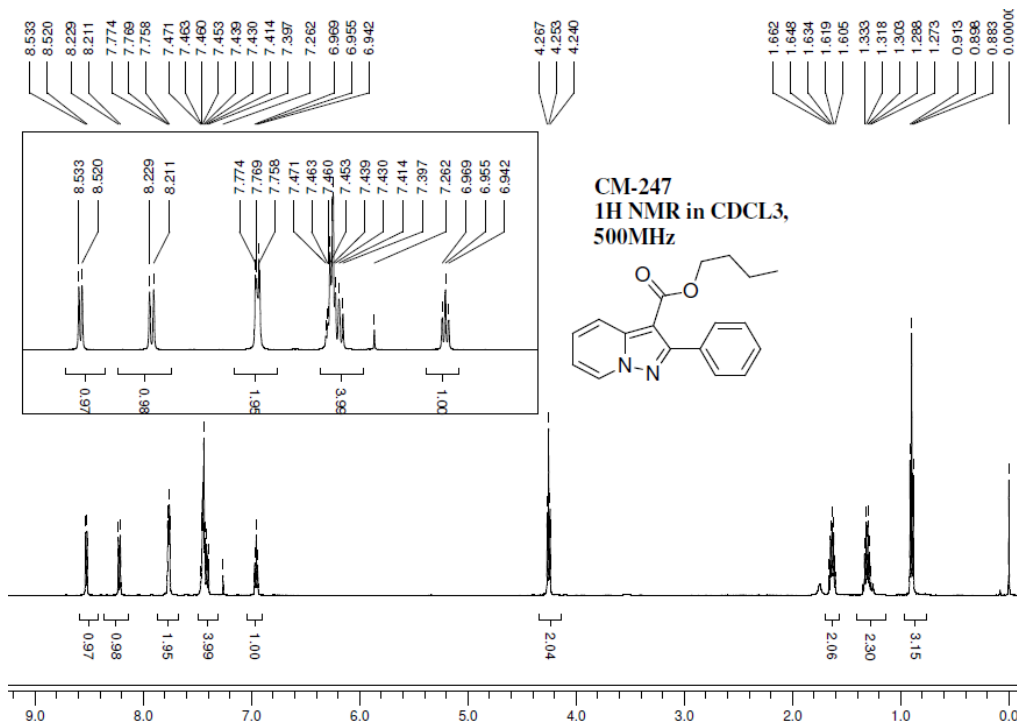

<sup>1</sup>H NMR of **3c**

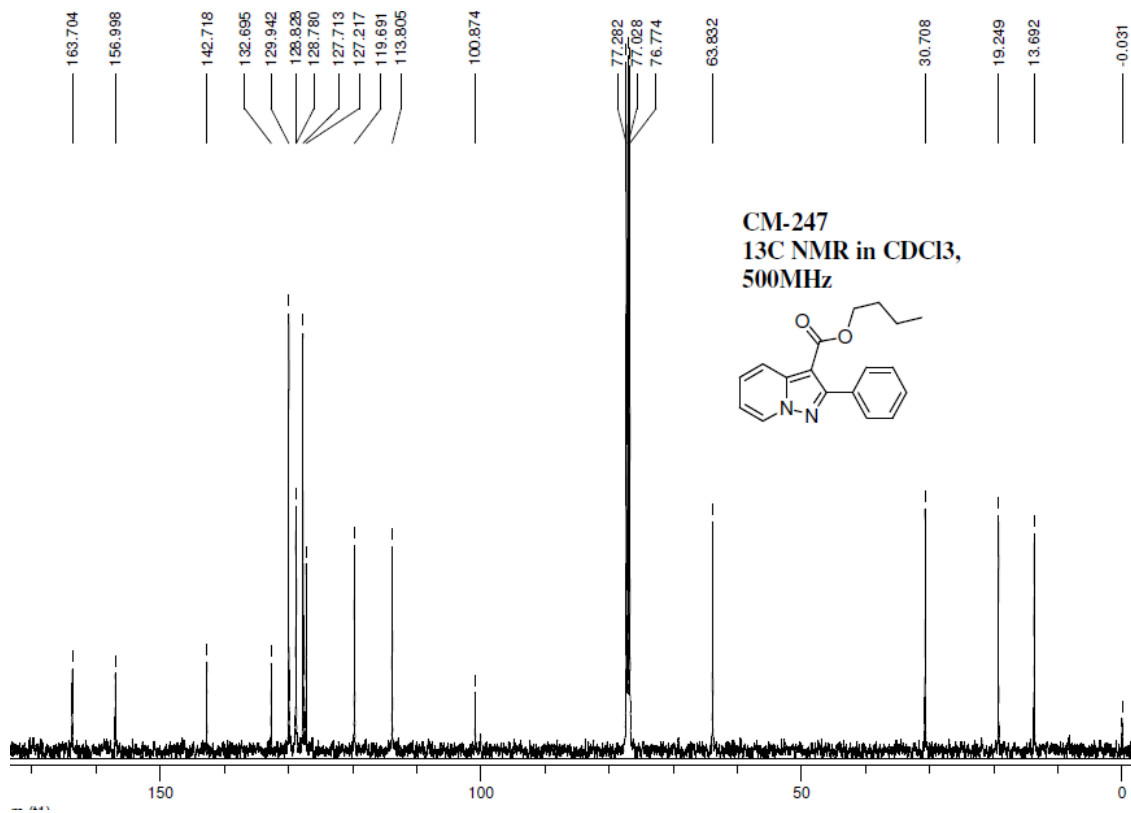

<sup>13</sup>C NMR of **3c**

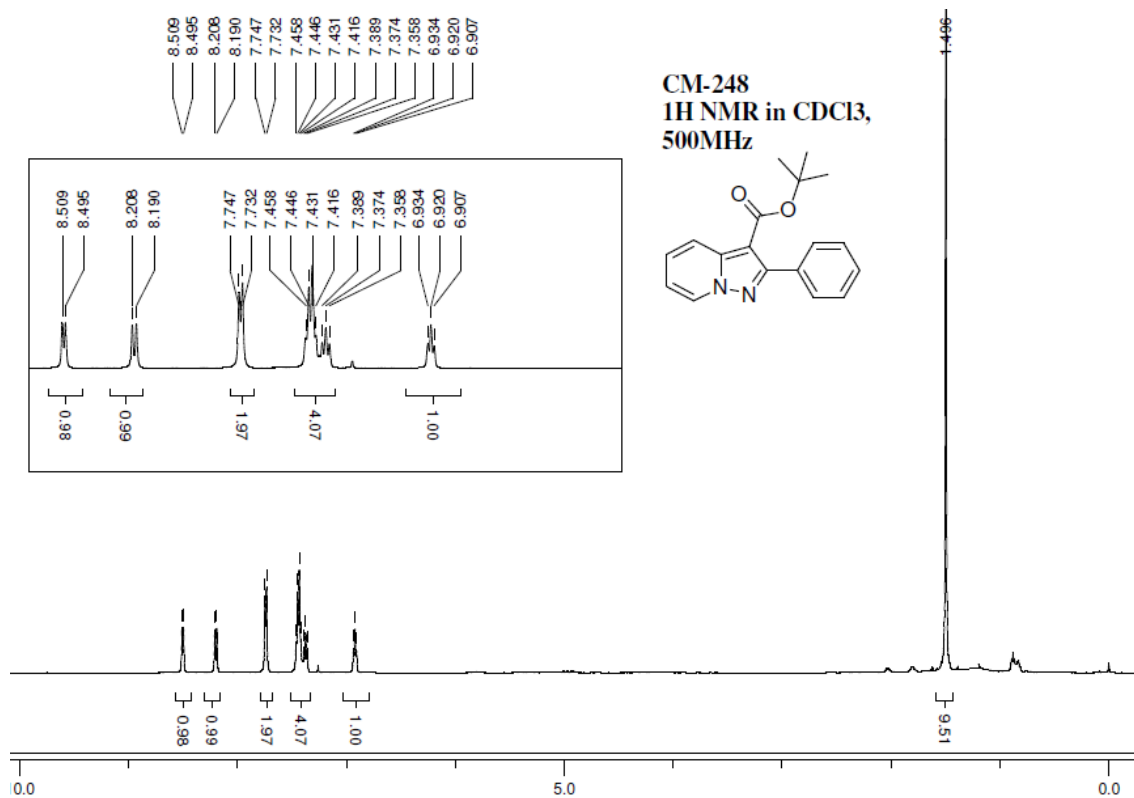

<sup>1</sup>H NMR of 3d

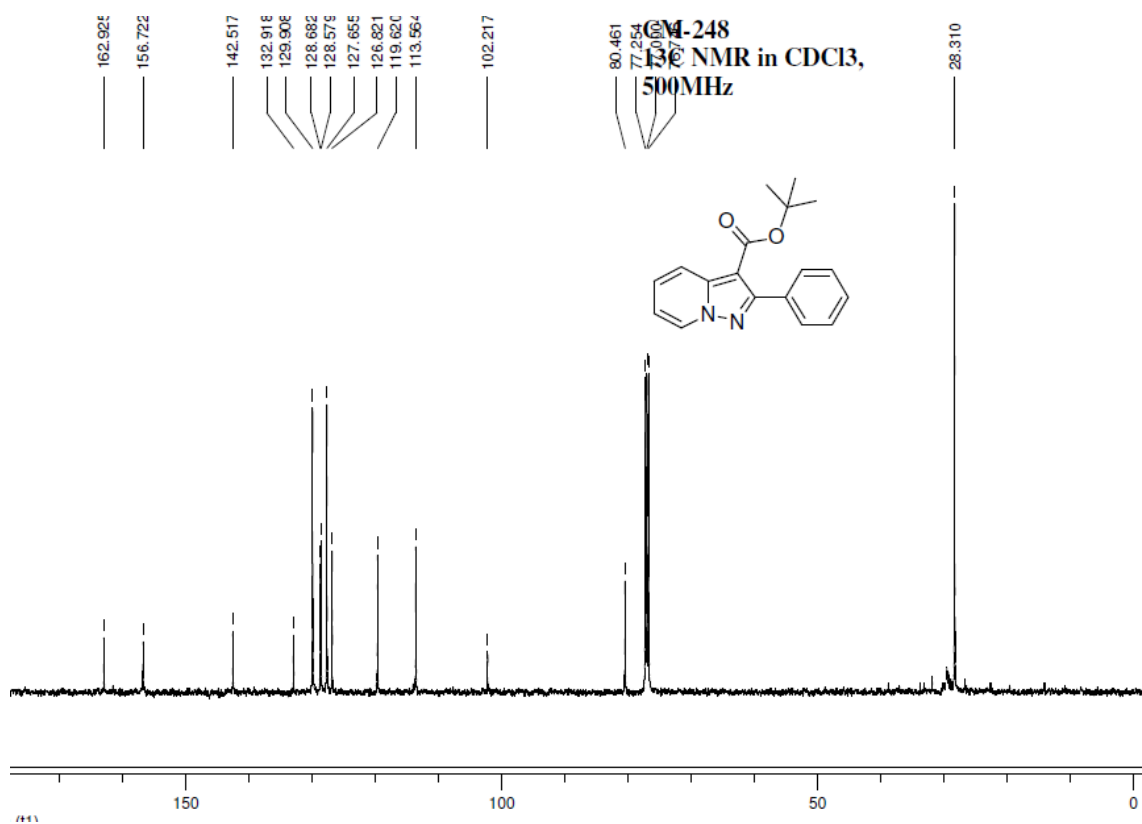

<sup>13</sup>C NMR of 3d

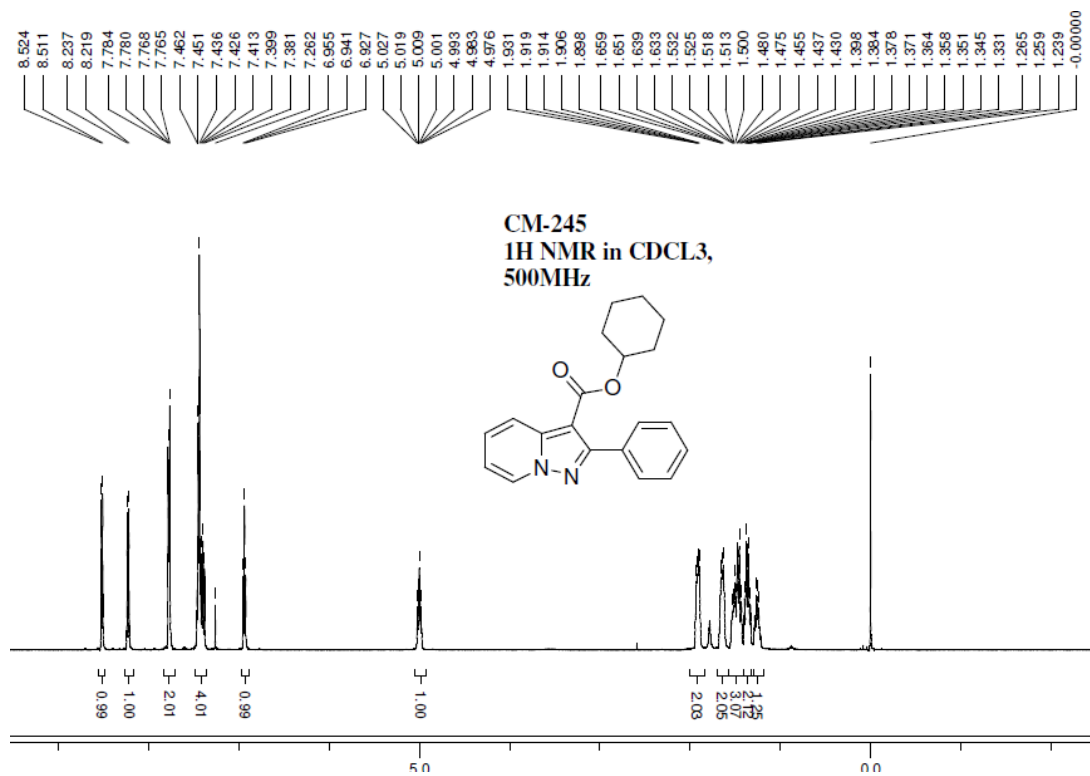

<sup>1</sup>H NMR of 3e

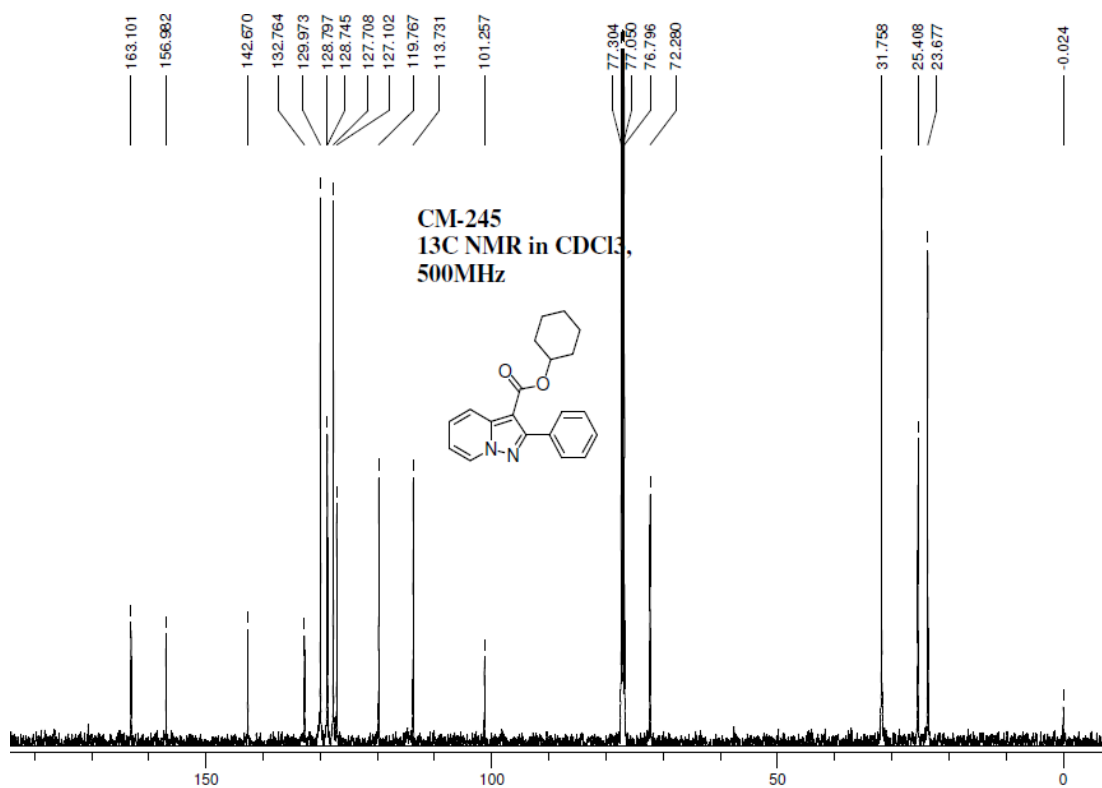

<sup>13</sup>C NMR of 3e

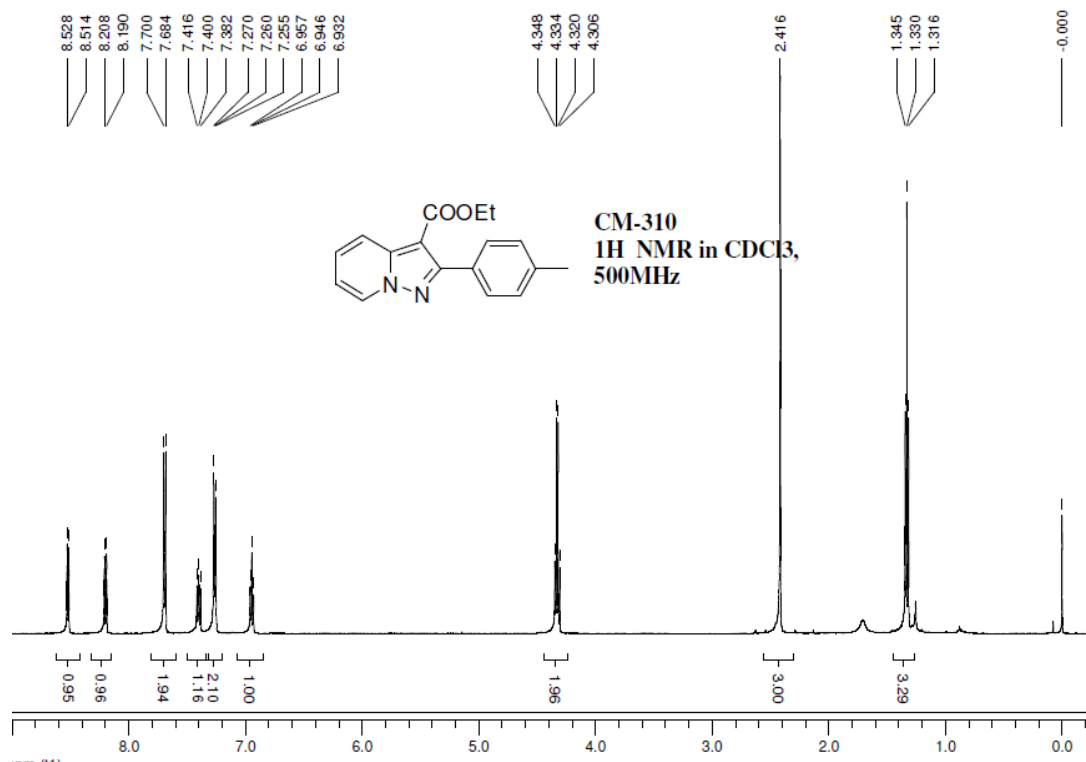

<sup>1</sup>H NMR of **4a**

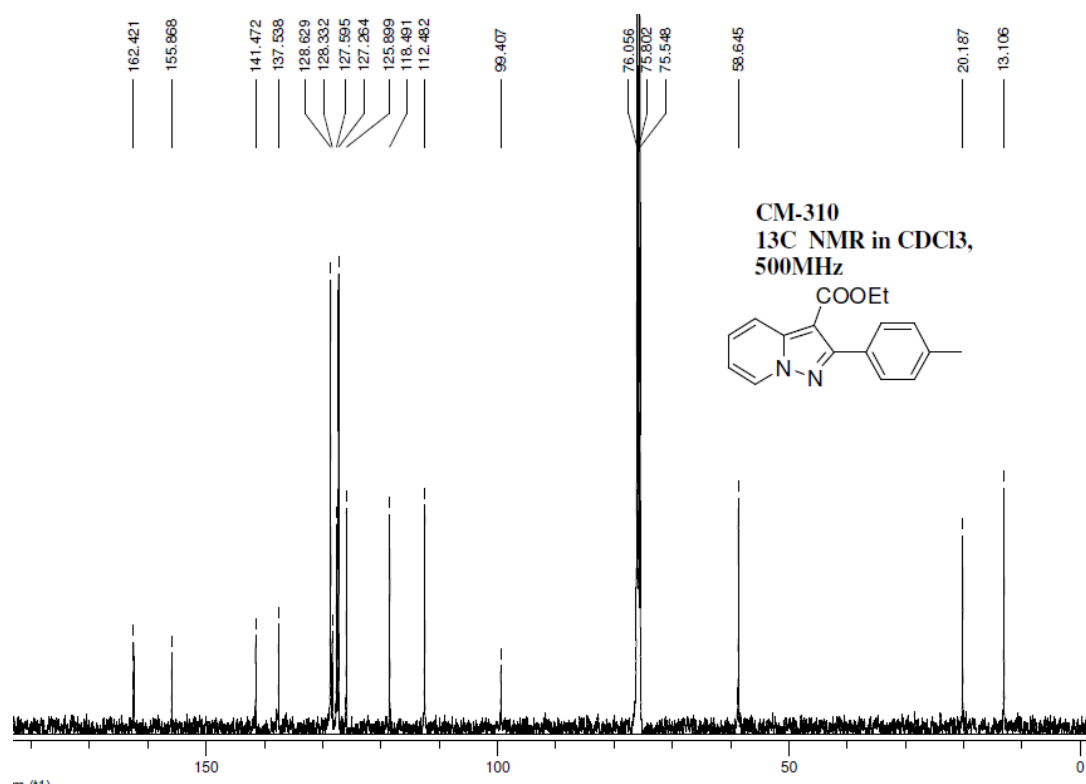

<sup>13</sup>C NMR of **4a**

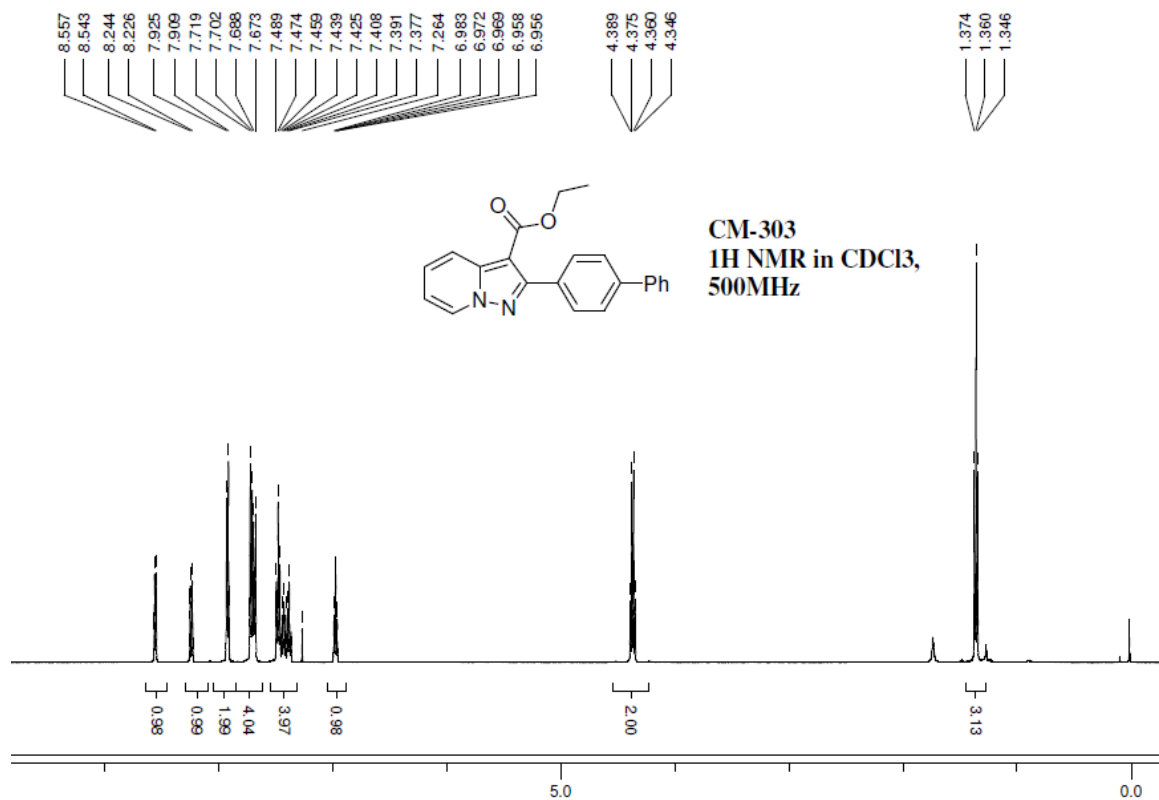

<sup>1</sup>H NMR of **4b**

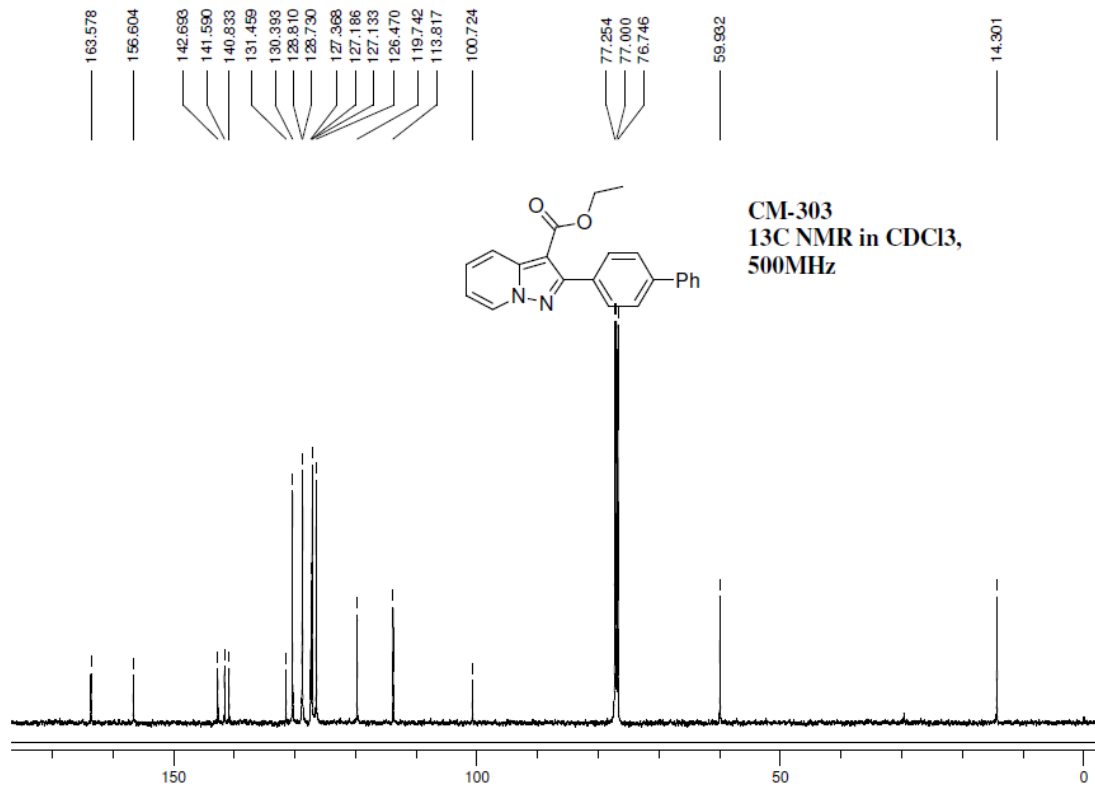

<sup>13</sup>C NMR of **4b**



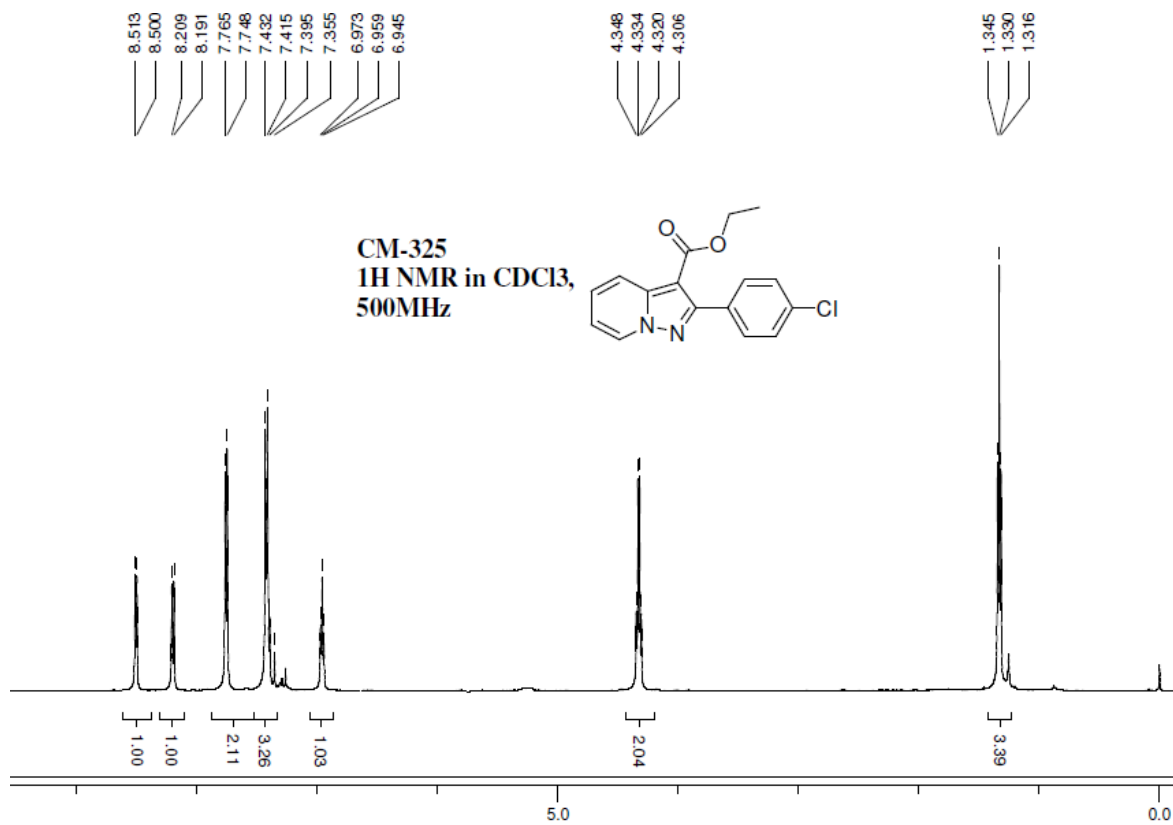

<sup>1</sup>H NMR of **4c**

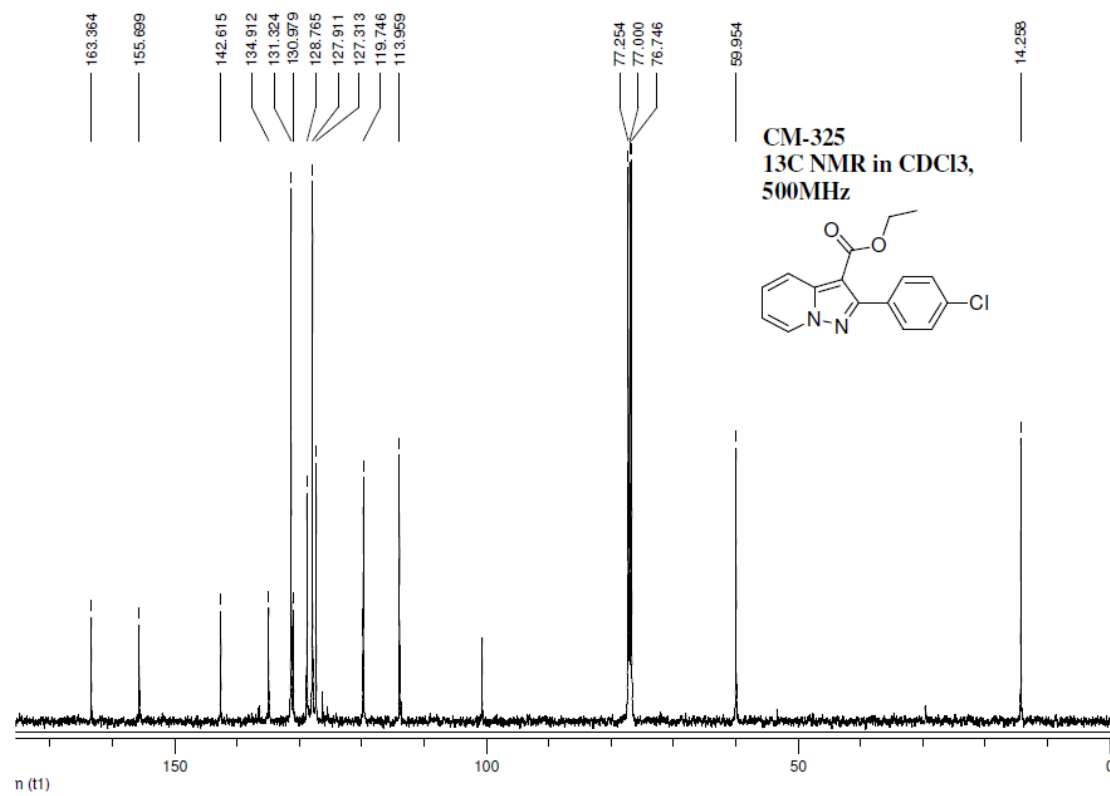

<sup>13</sup>C NMR of **4c**

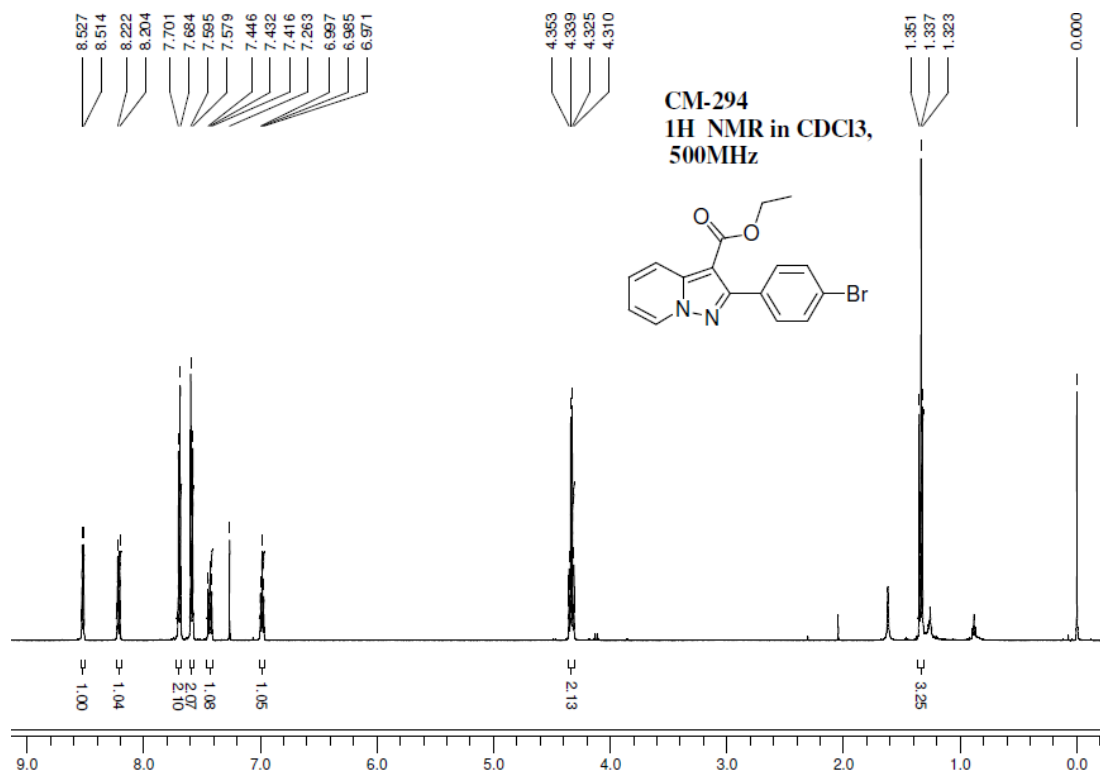

<sup>1</sup>H NMR of **4d**

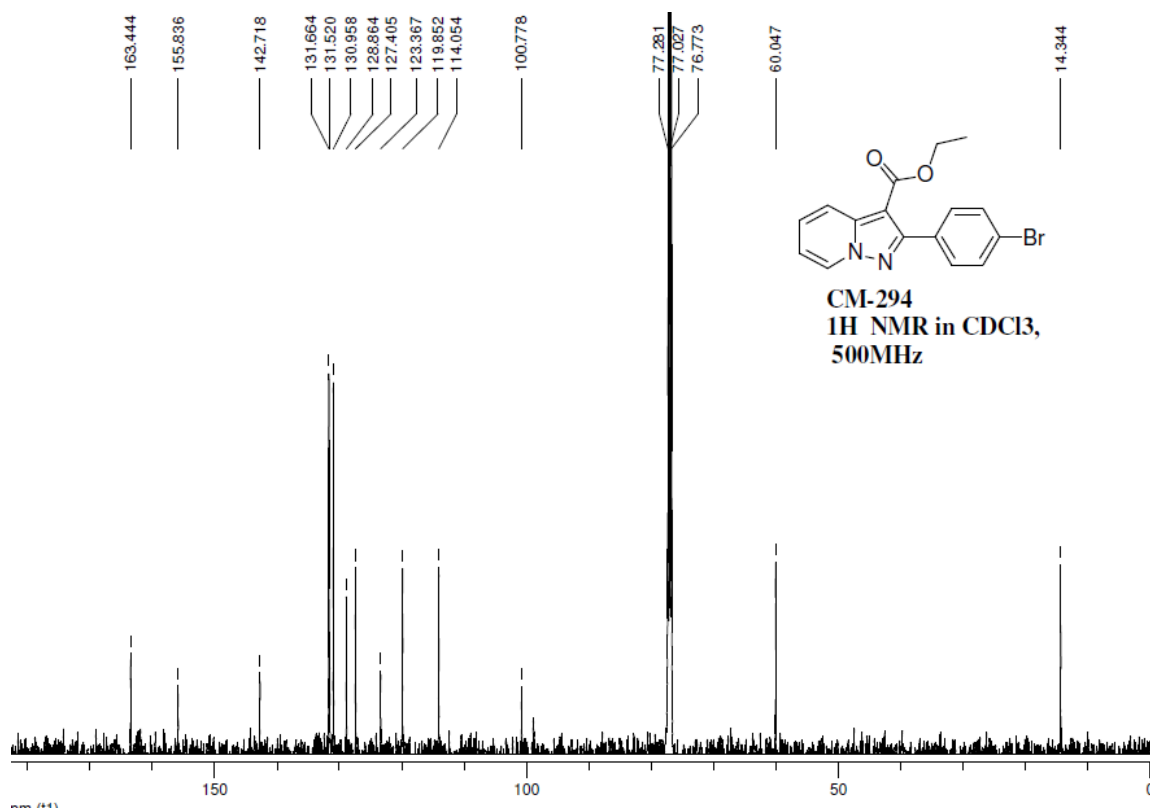

<sup>13</sup>C NMR of **4d**

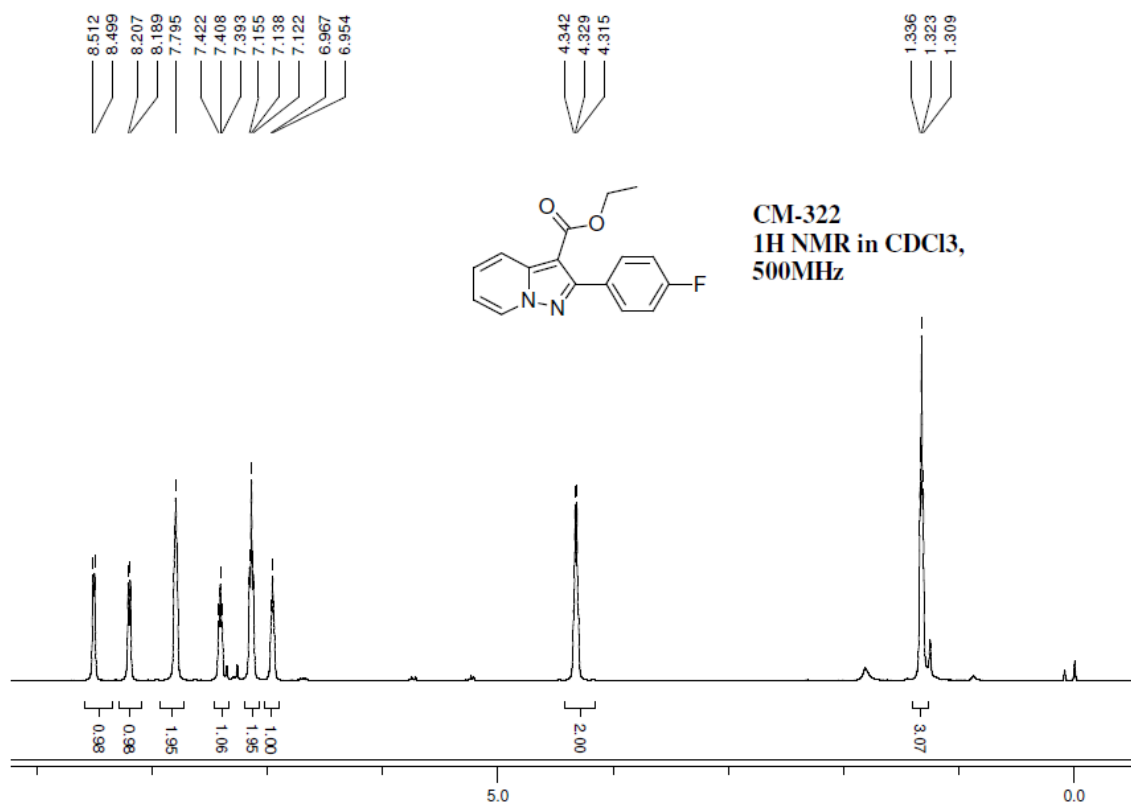

<sup>1</sup>H NMR of 4e

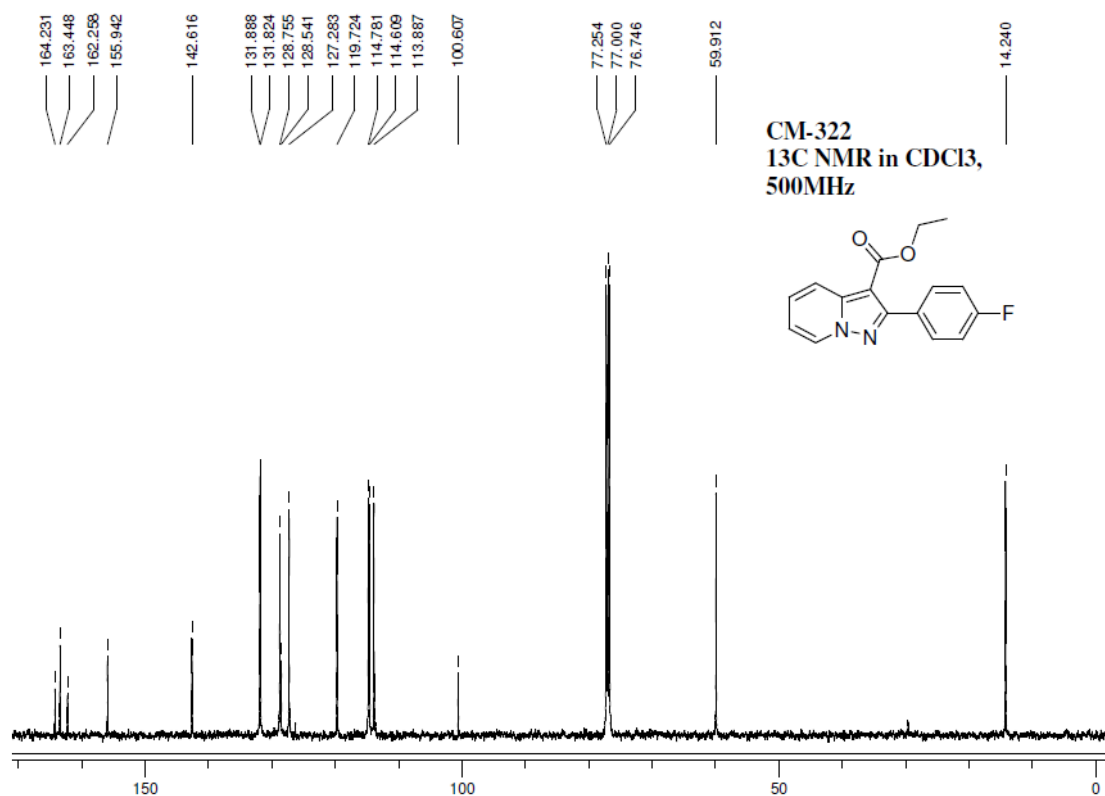

<sup>13</sup>C NMR of 4e

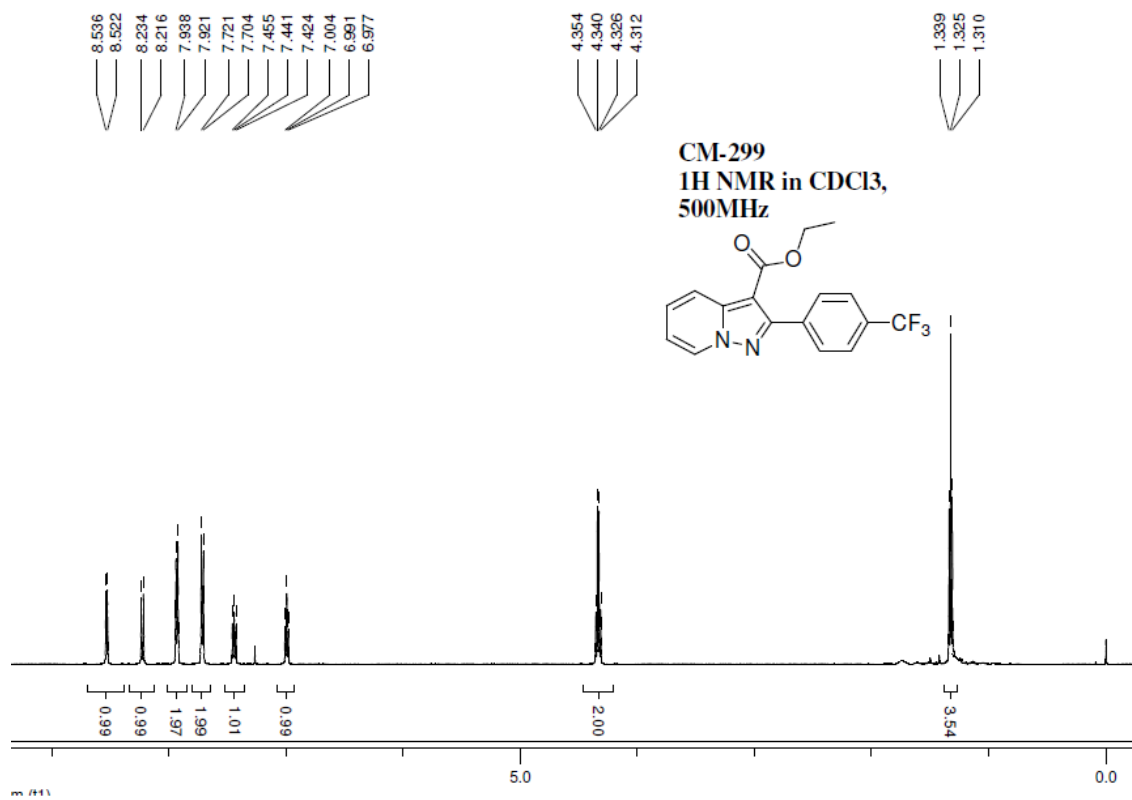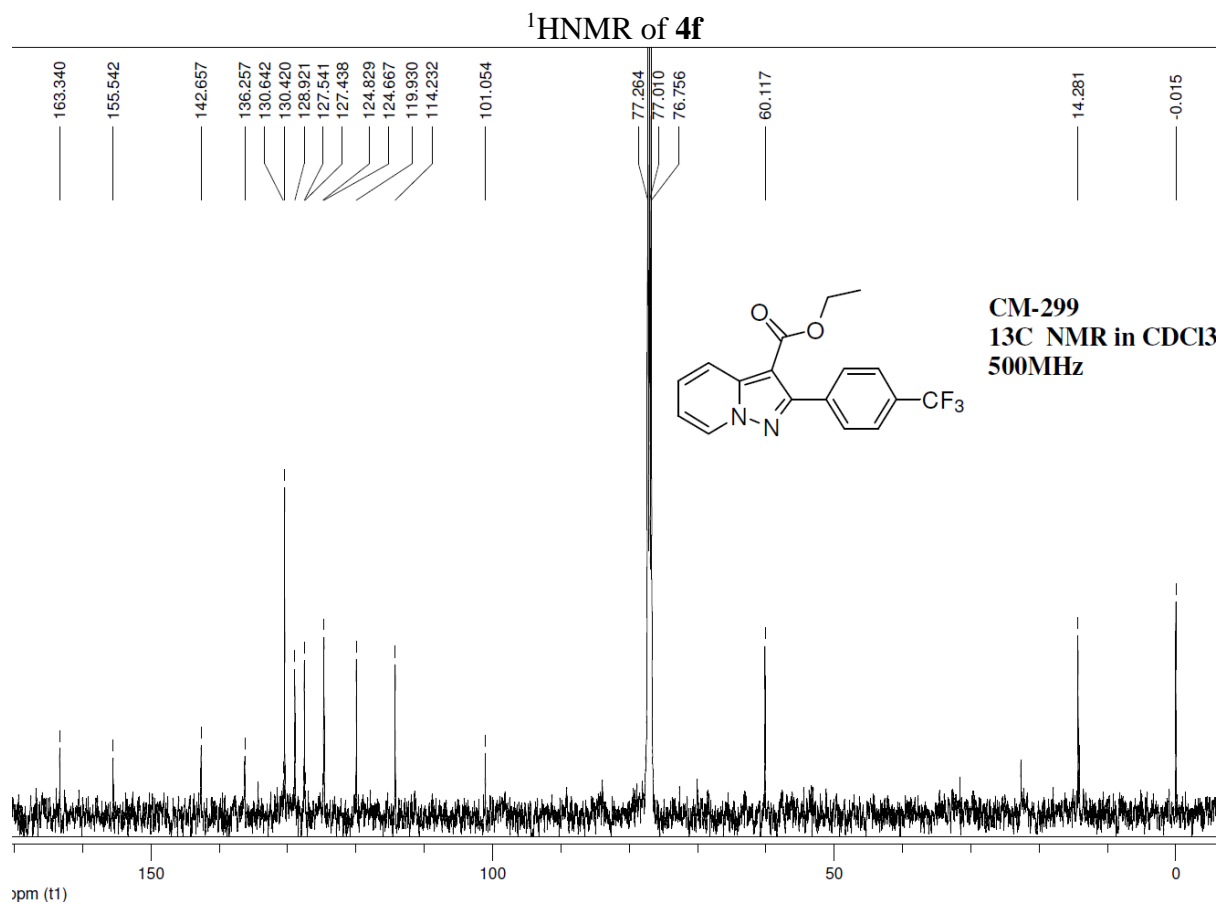

<sup>13</sup>C NMR of **4f**

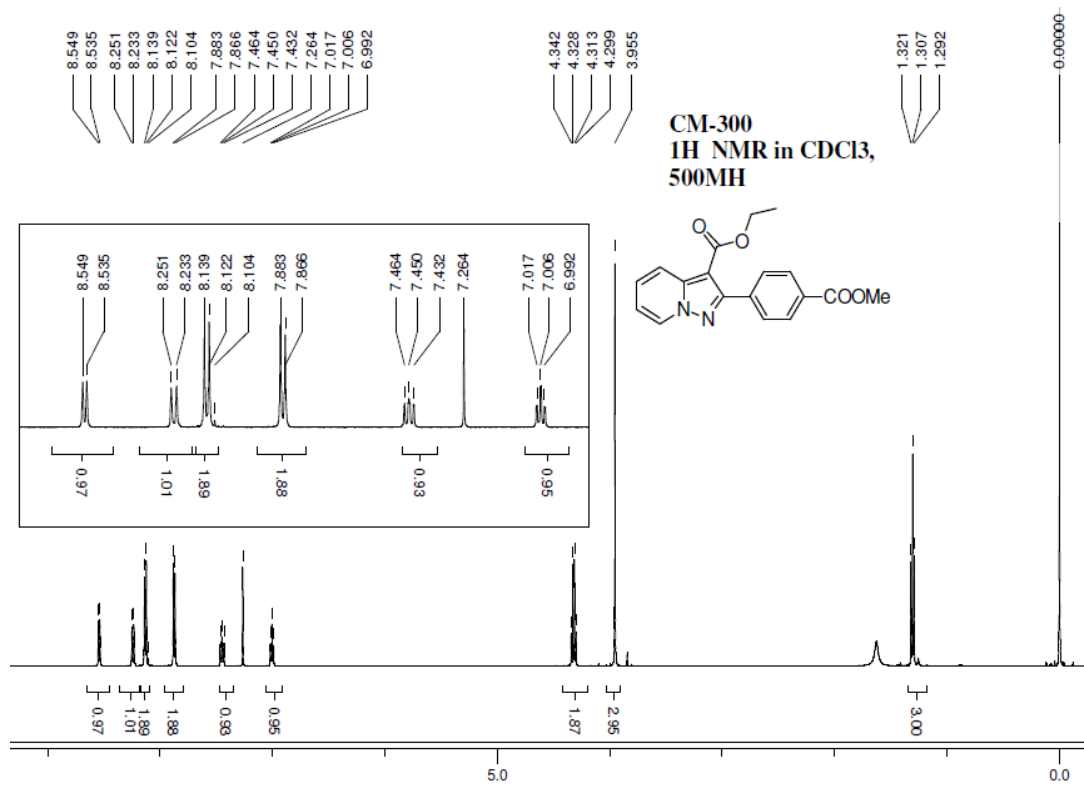

<sup>1</sup>H NMR of 4g

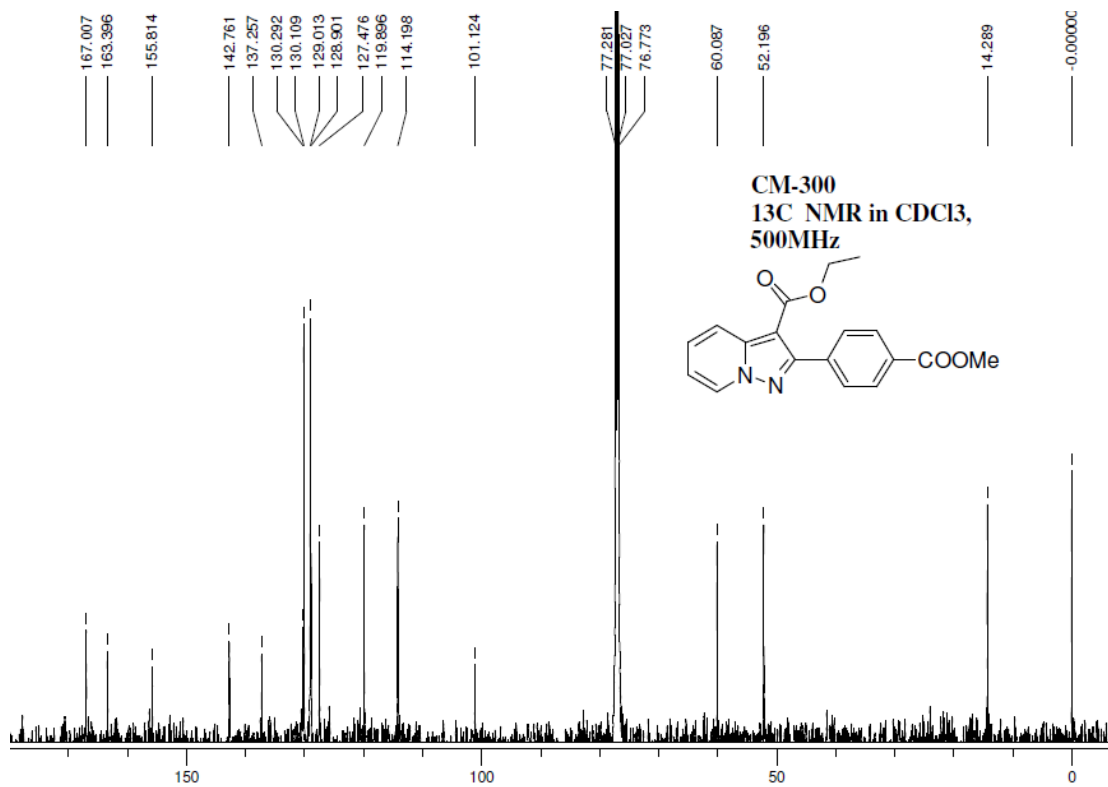

<sup>13</sup>C NMR of 4g

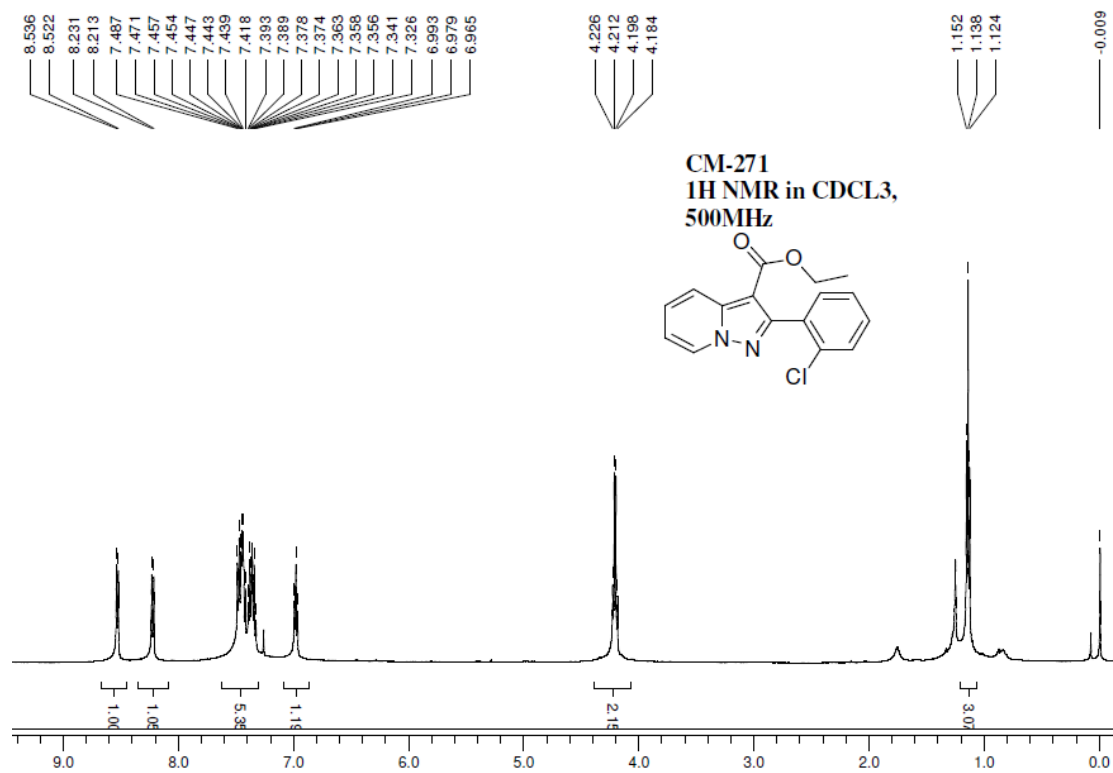

<sup>1</sup>H NMR of **4j**

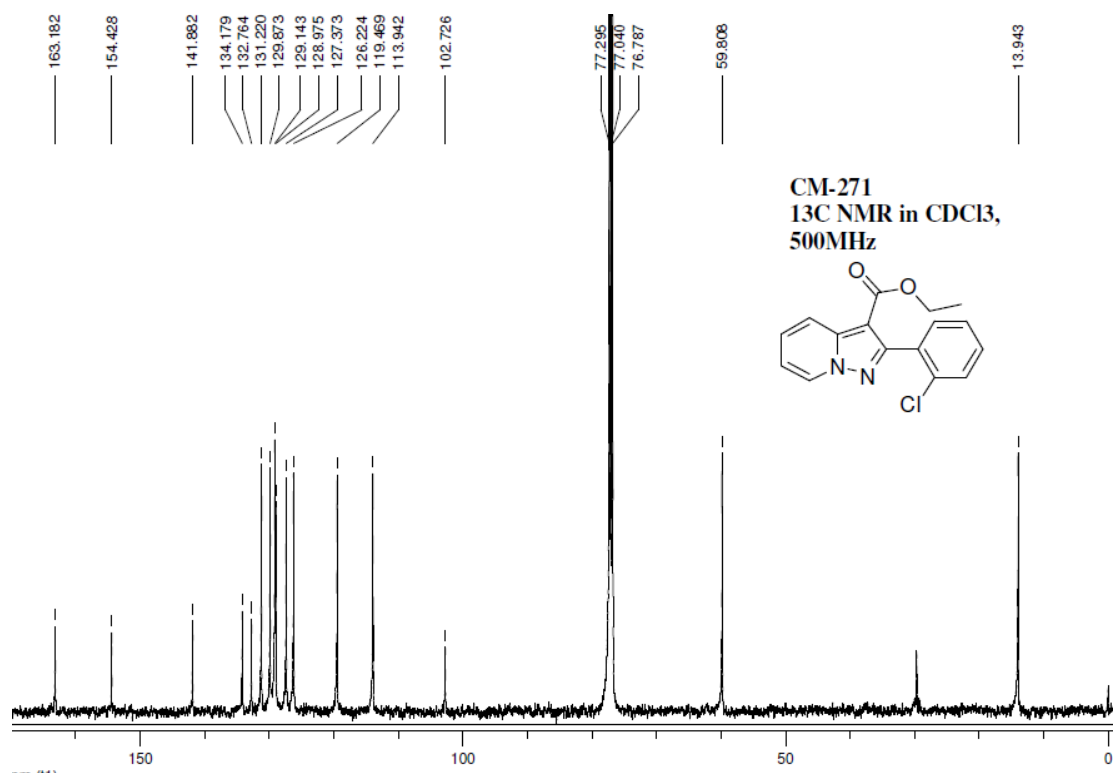

<sup>13</sup>C NMR of **4j**

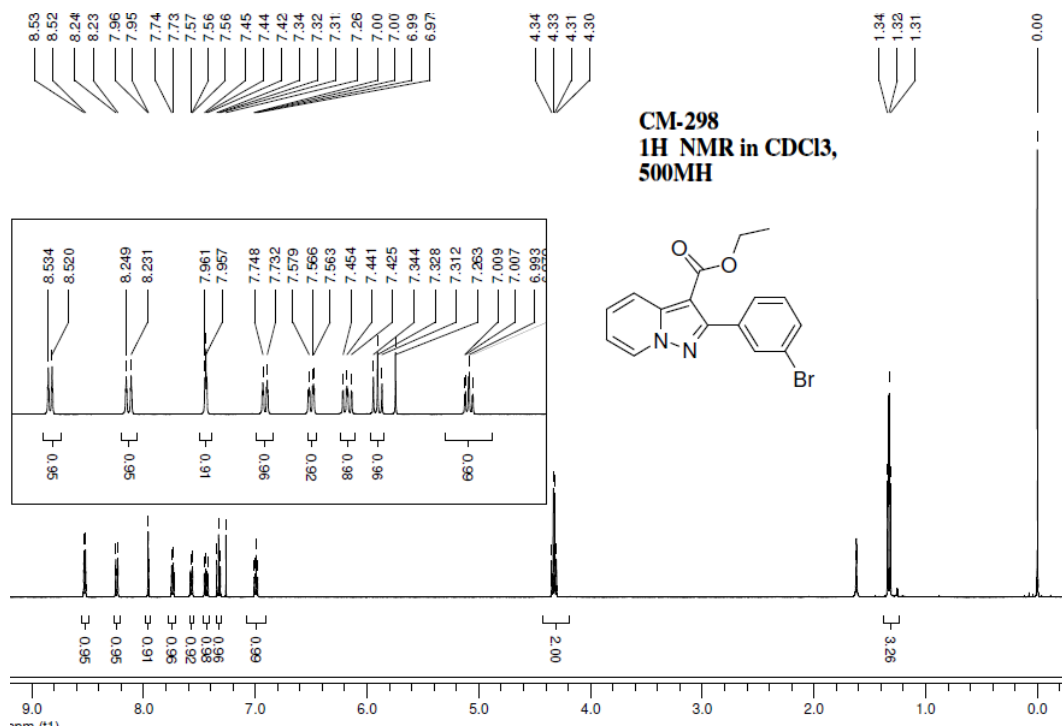

<sup>1</sup>H NMR of **4k**

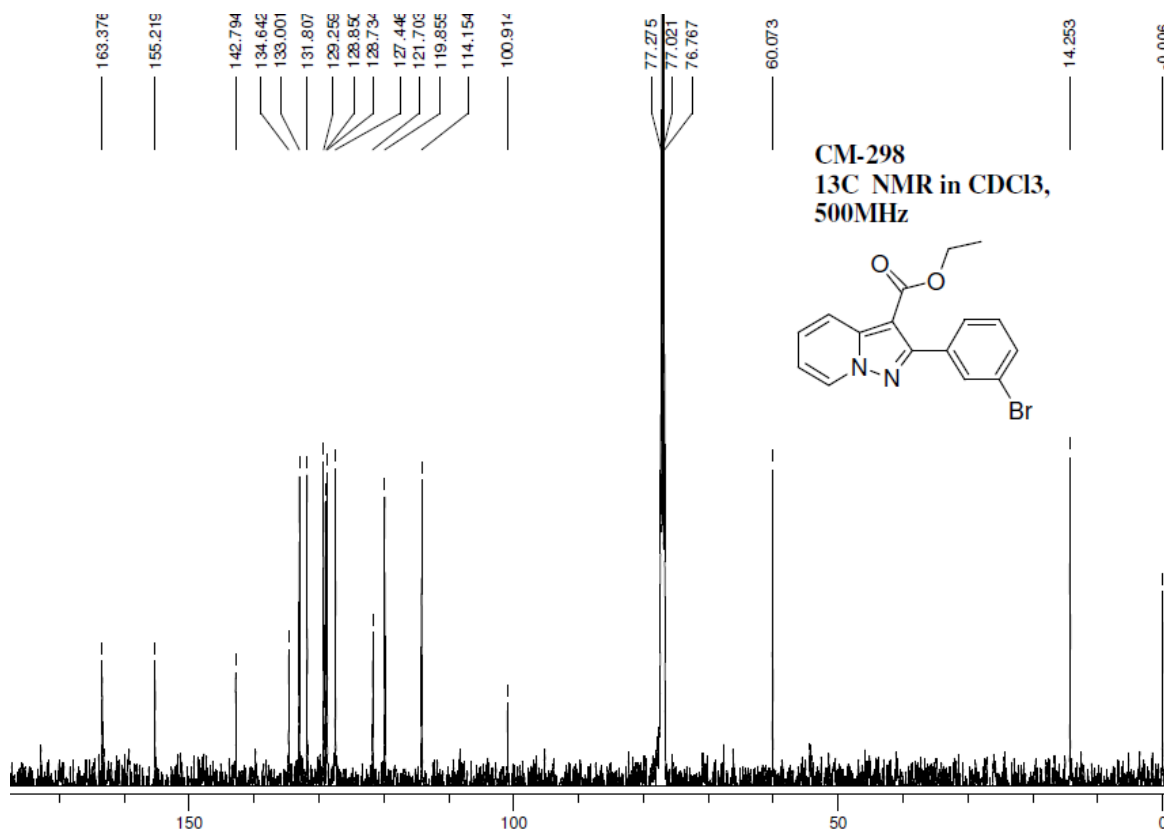

<sup>13</sup>C NMR of **4k**

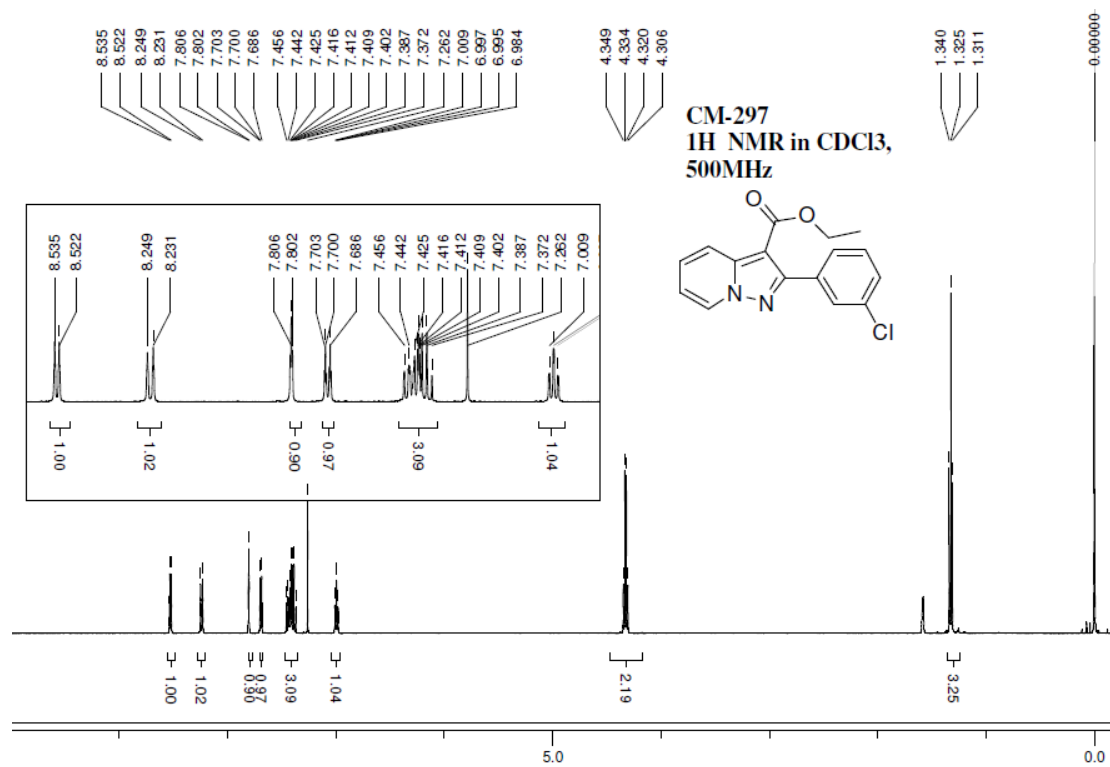

<sup>1</sup>H NMR of 41

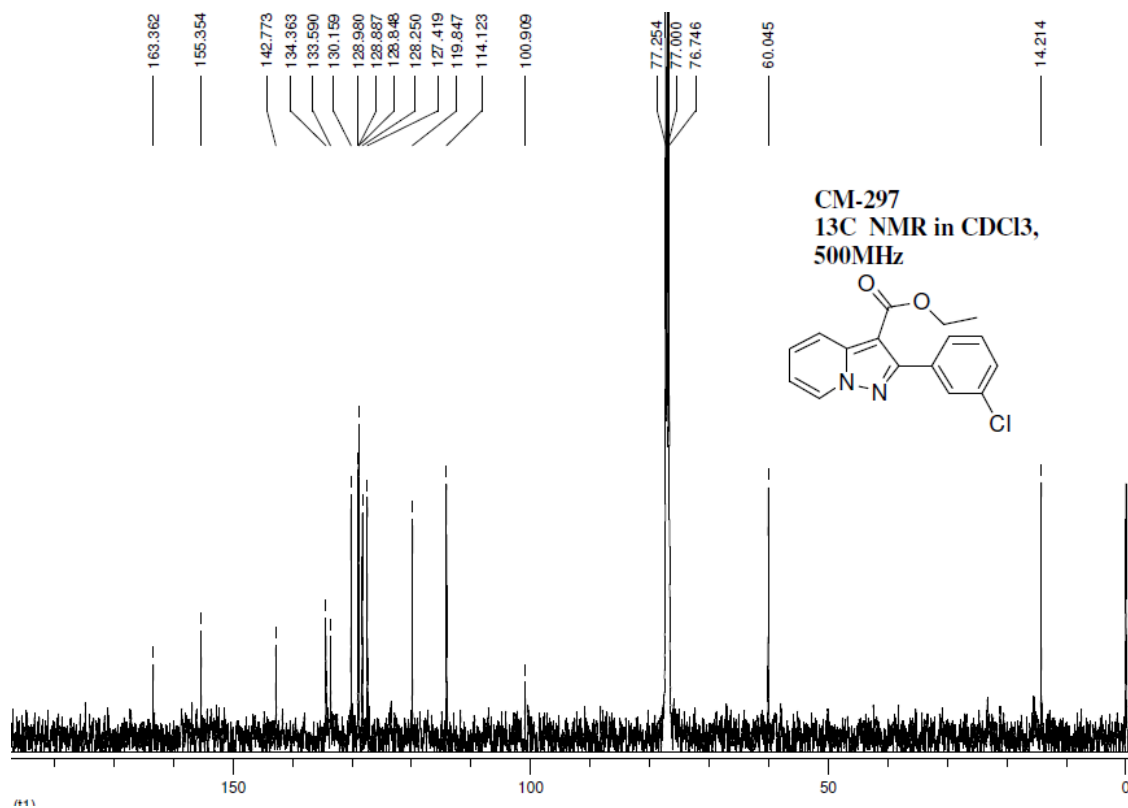

<sup>13</sup>C NMR of 41



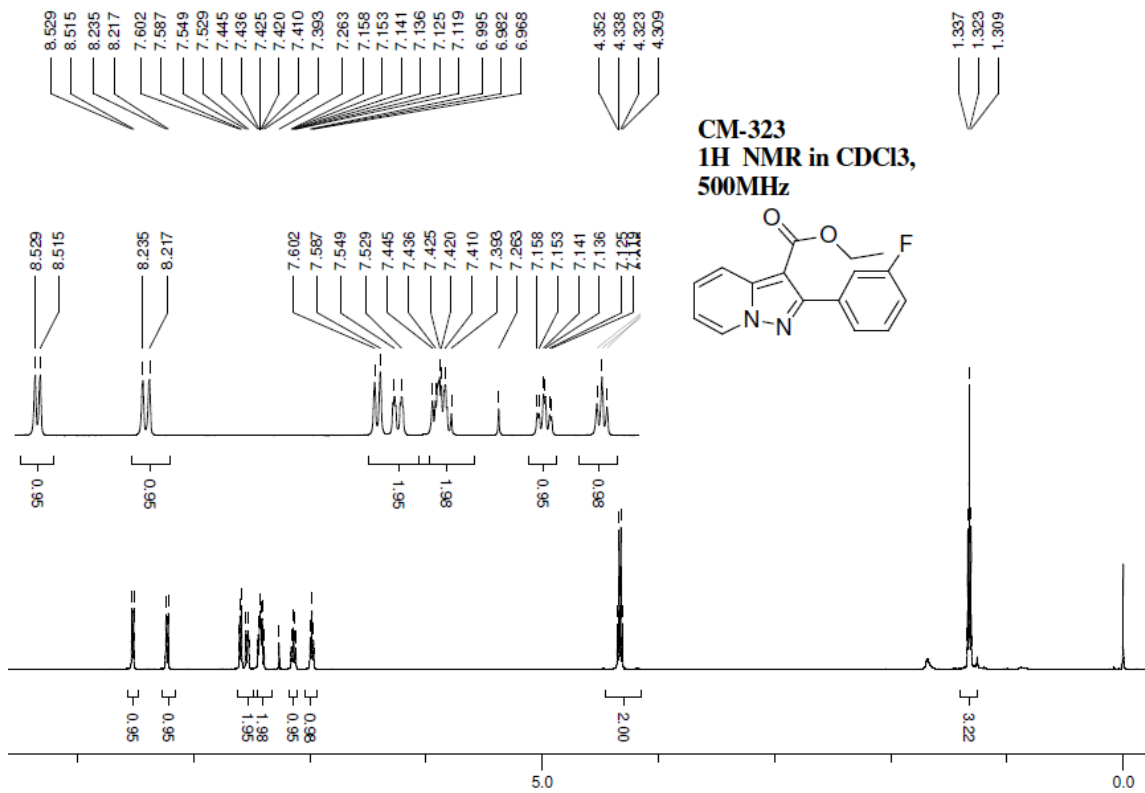

<sup>1</sup>H NMR of **4m**

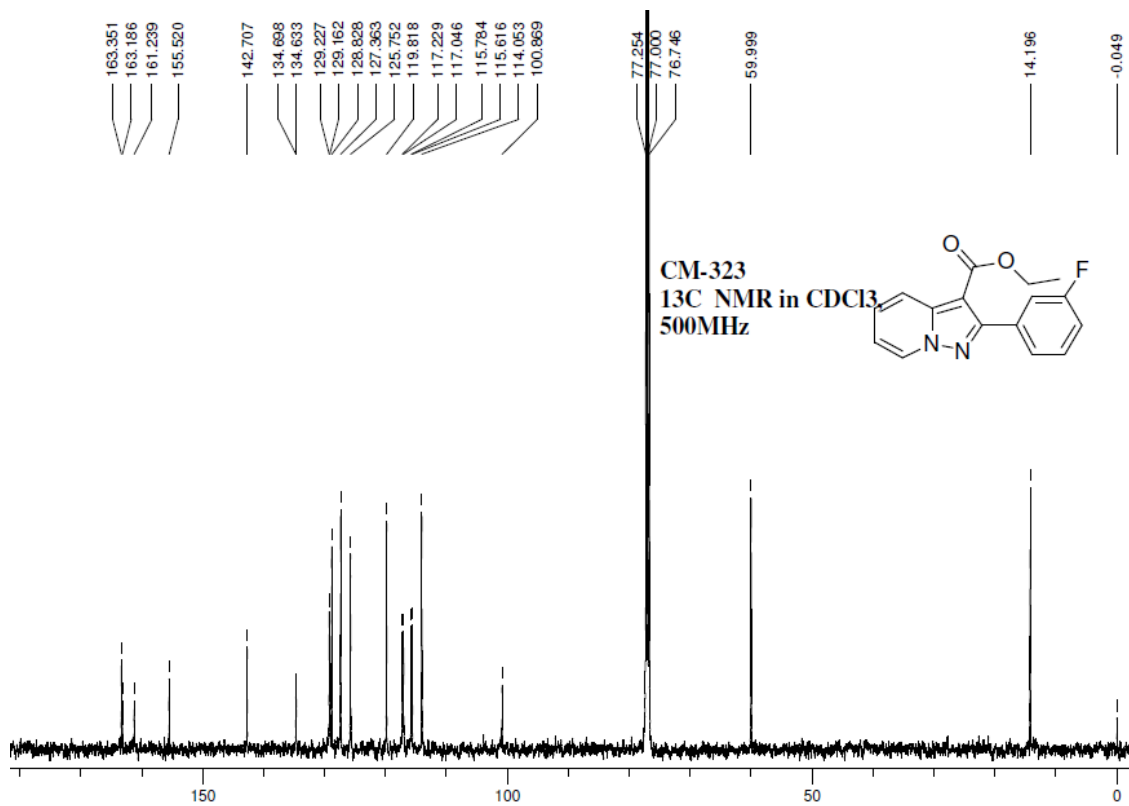

<sup>13</sup>C NMR of **4m**

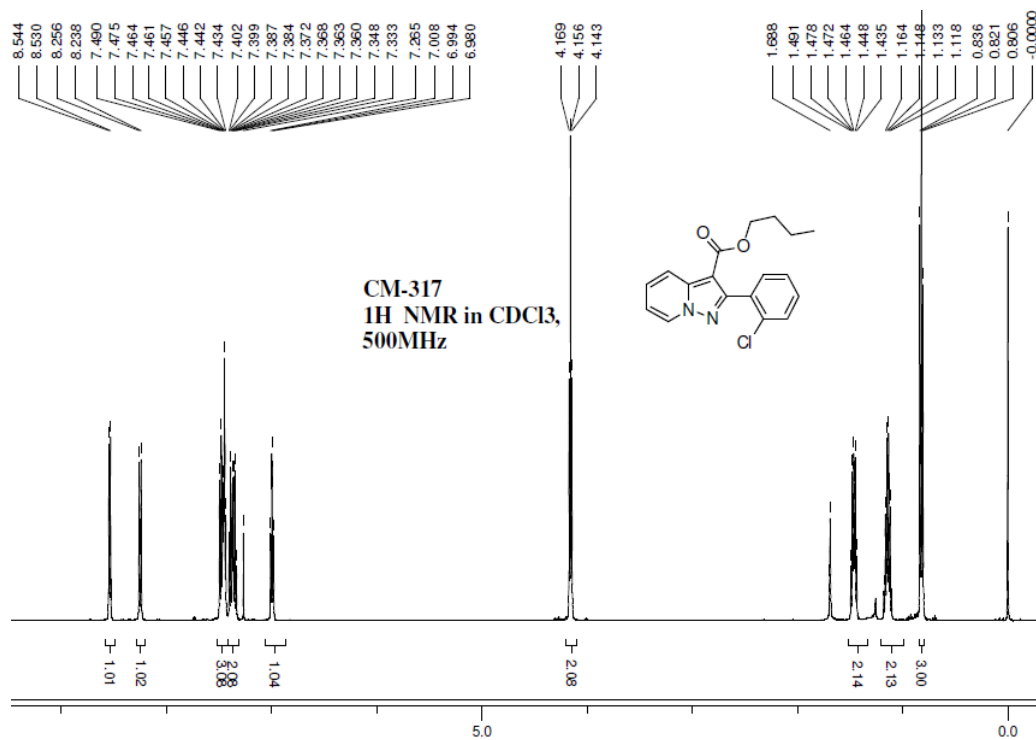

<sup>1</sup>H NMR of 4n

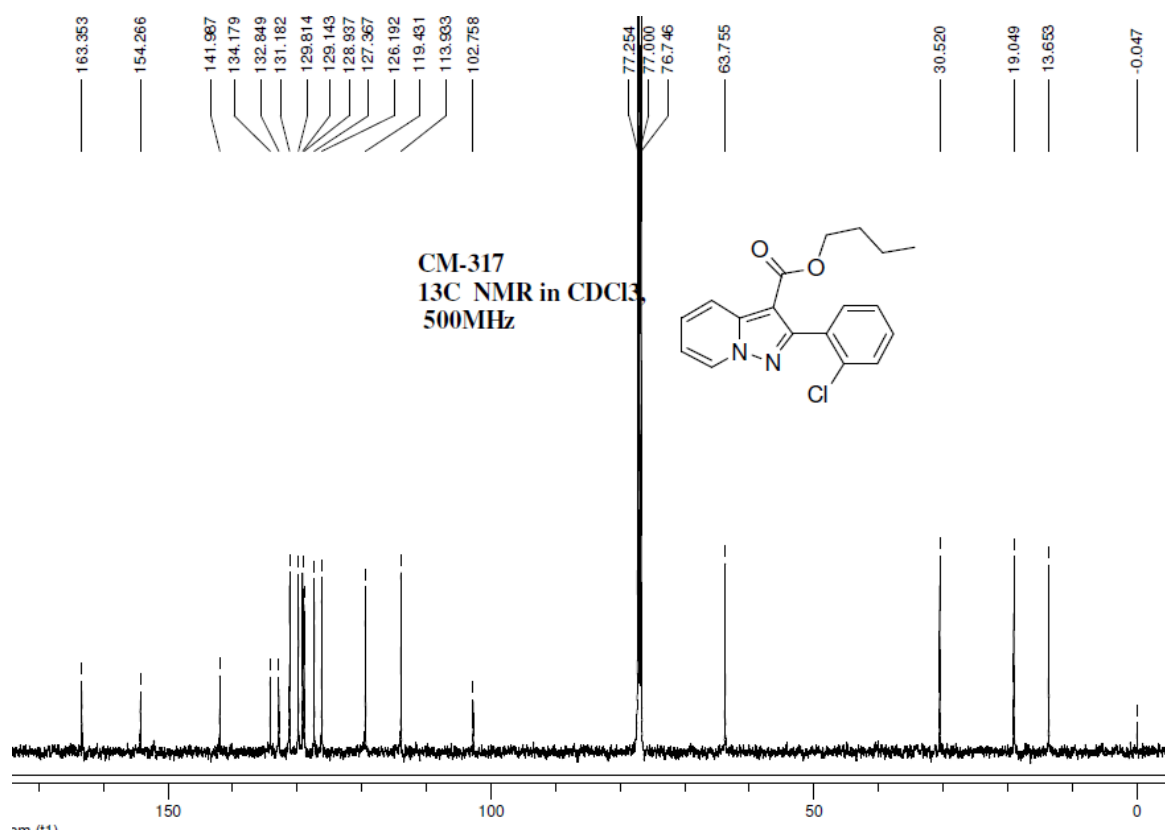

<sup>13</sup>C NMR of 4n

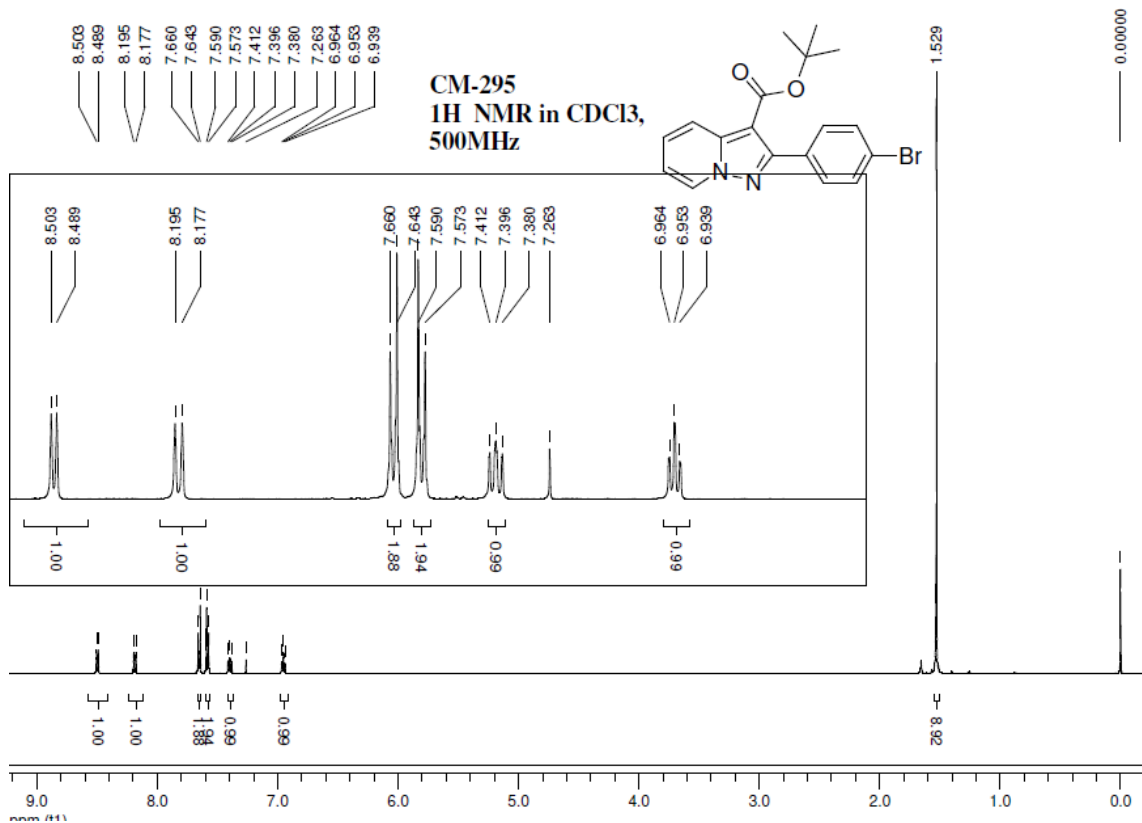

<sup>1</sup>H NMR of **4o**

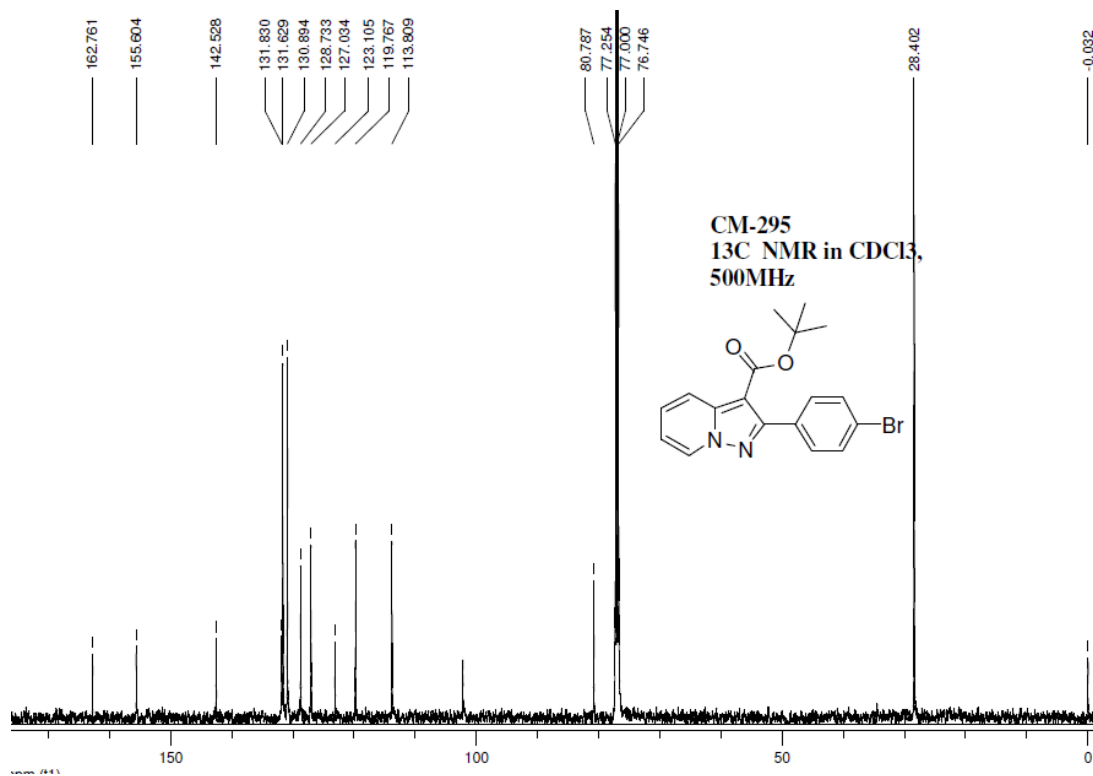

<sup>13</sup>C NMR of **4o**

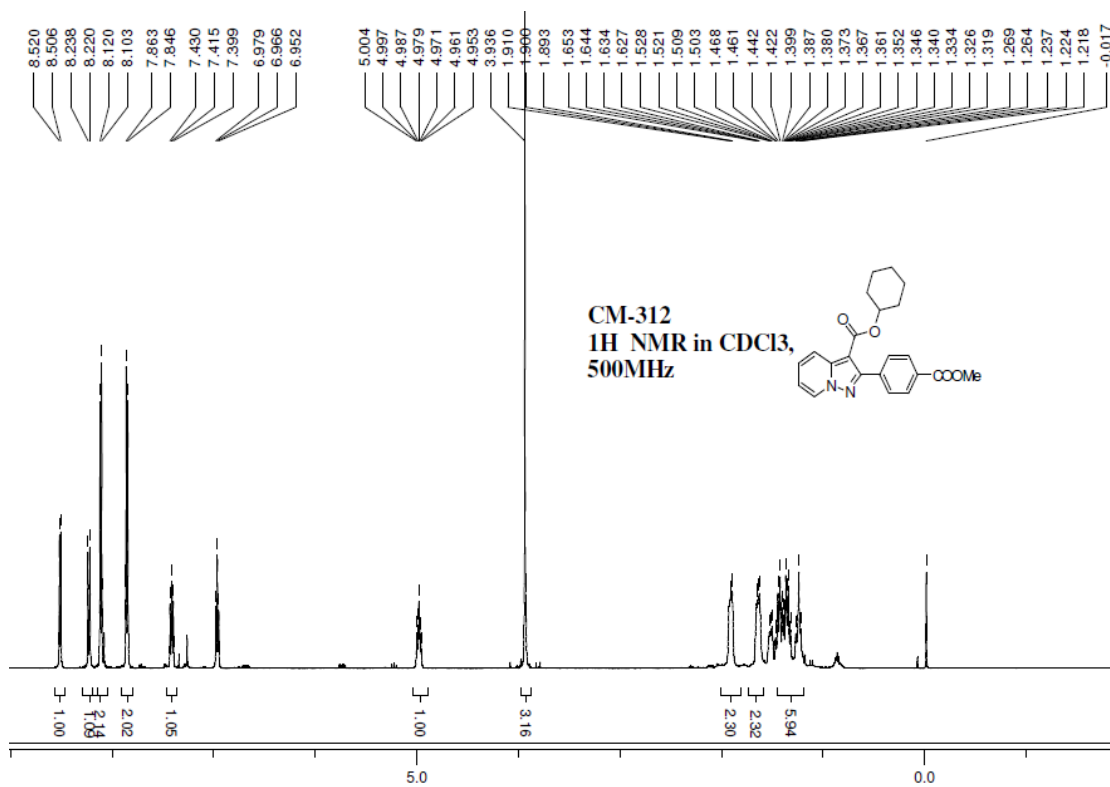

<sup>1</sup>H NMR of **4p**

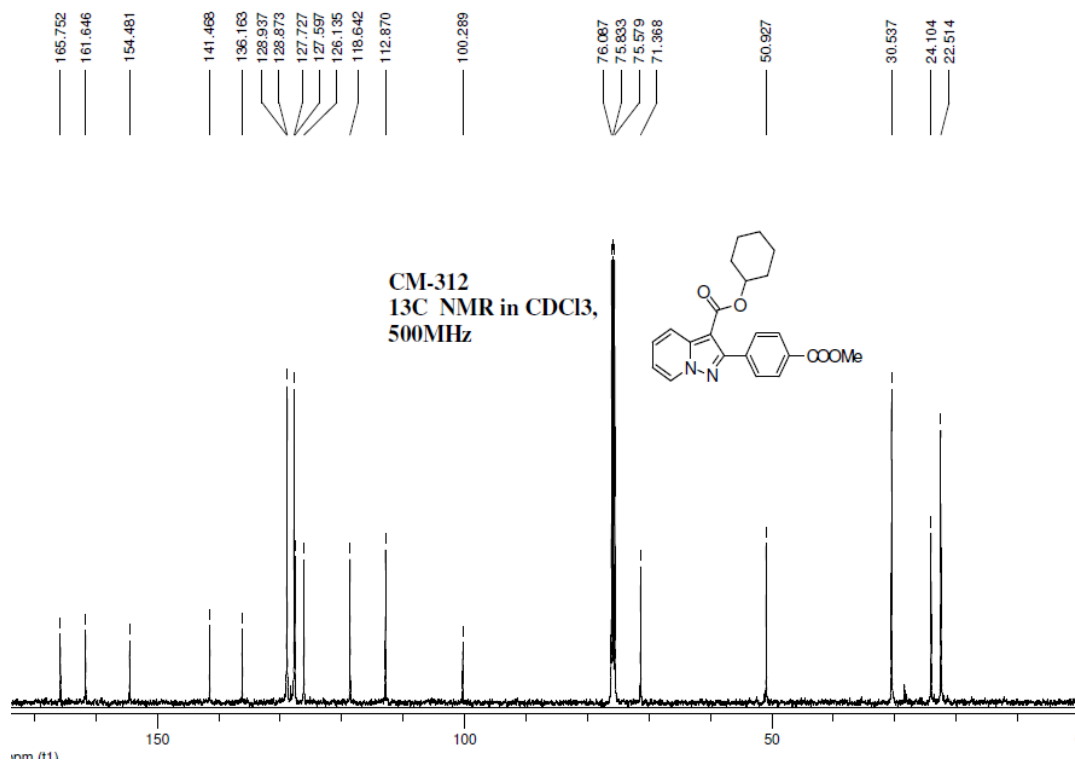

<sup>13</sup>C NMR of **4p**

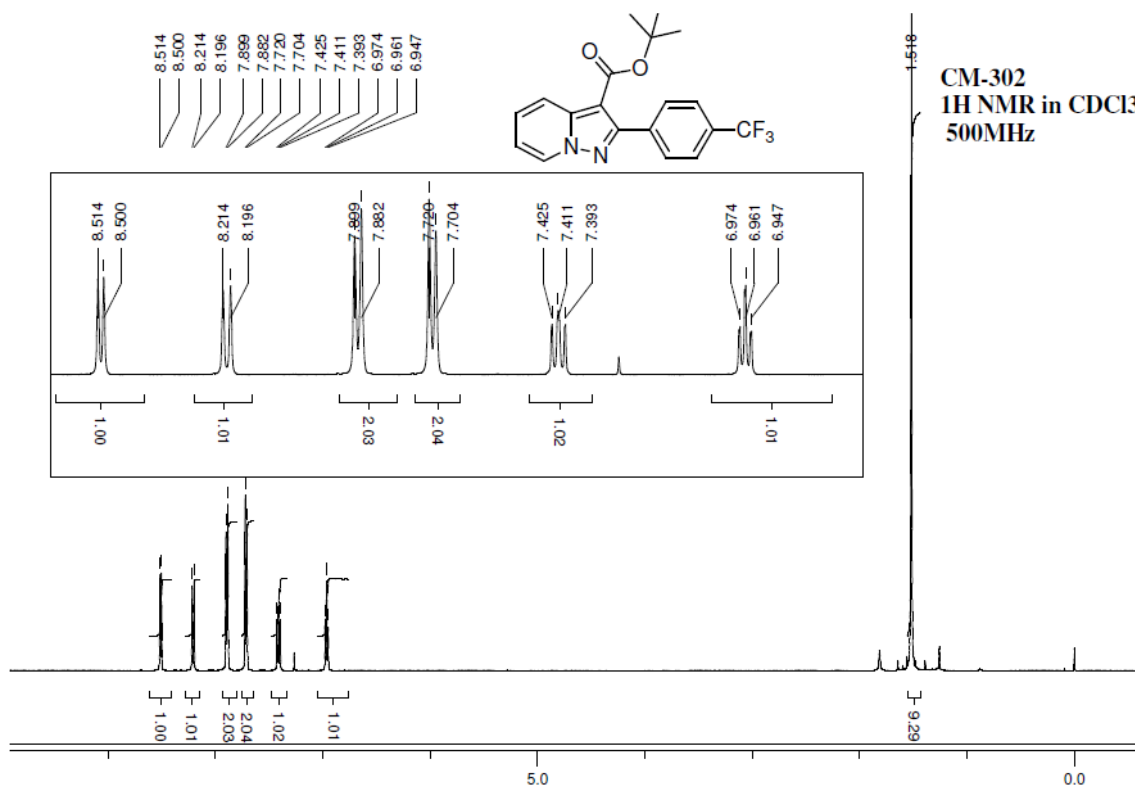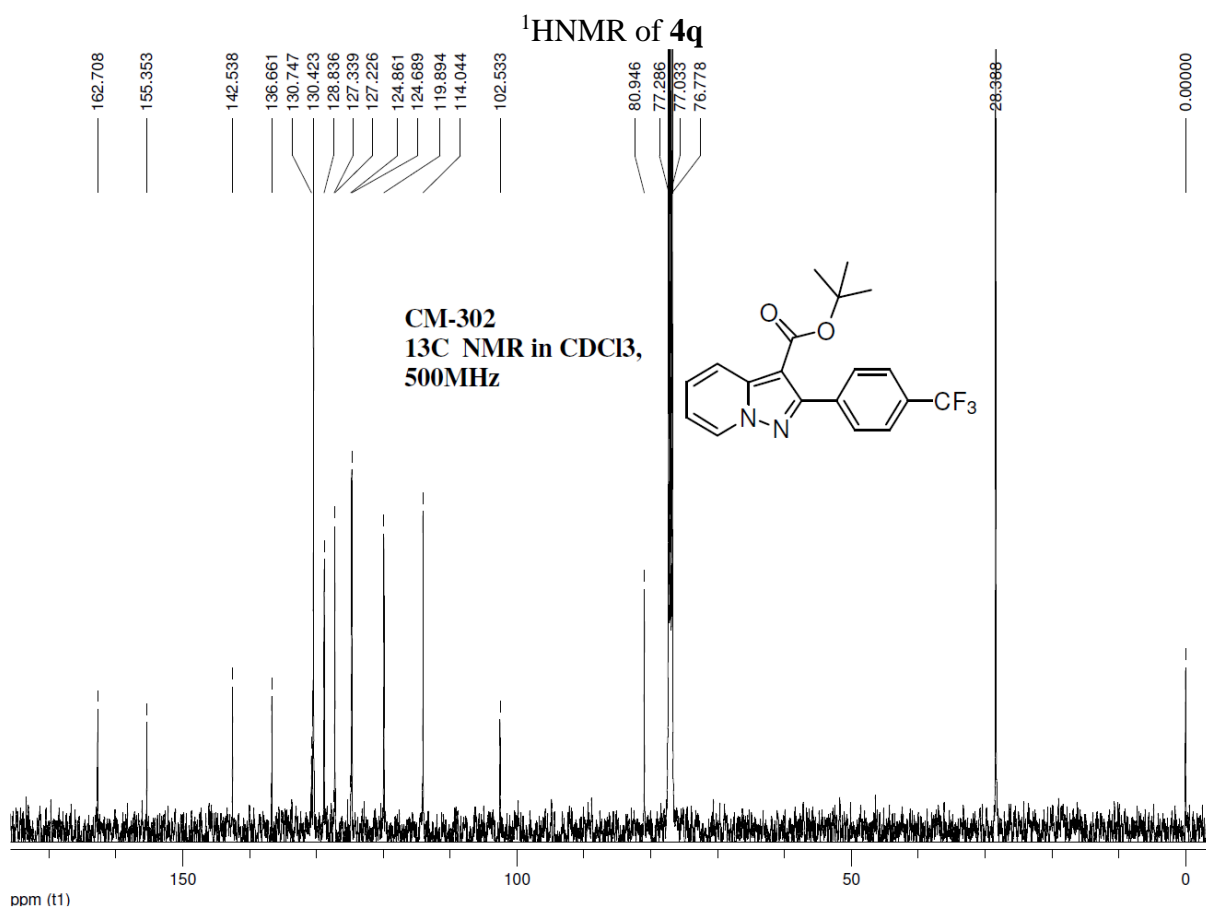

<sup>13</sup>C NMR of **4q**

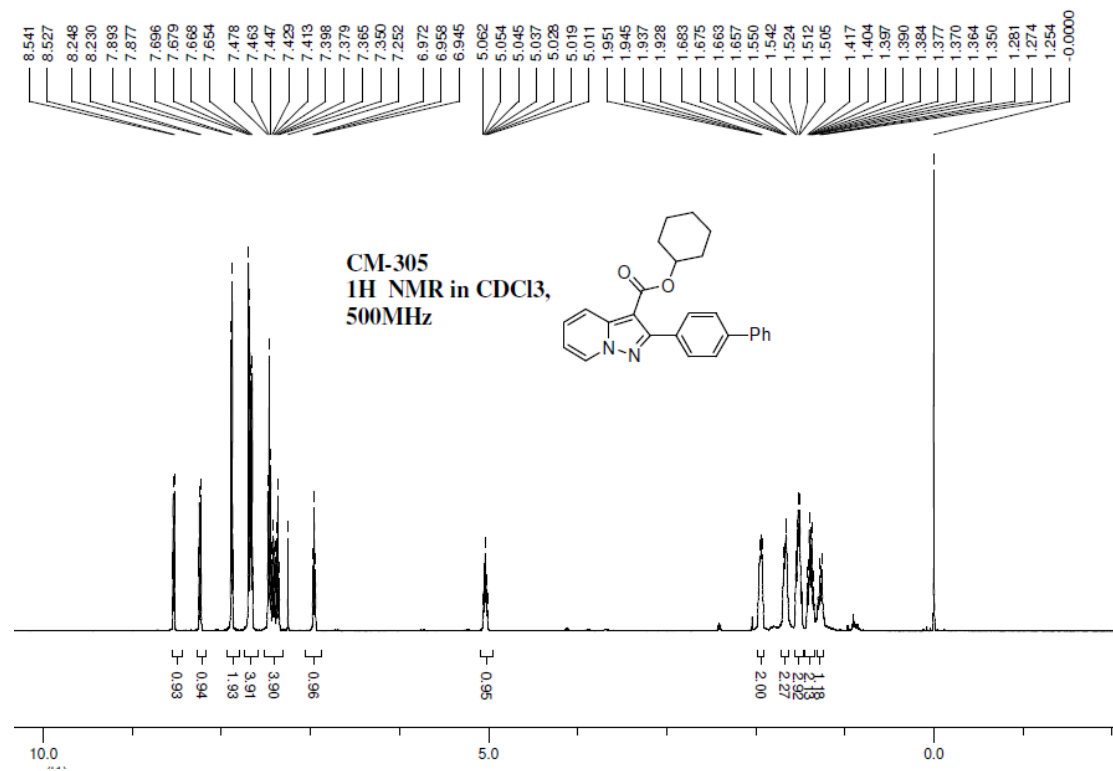

<sup>1</sup>H NMR of **4r**

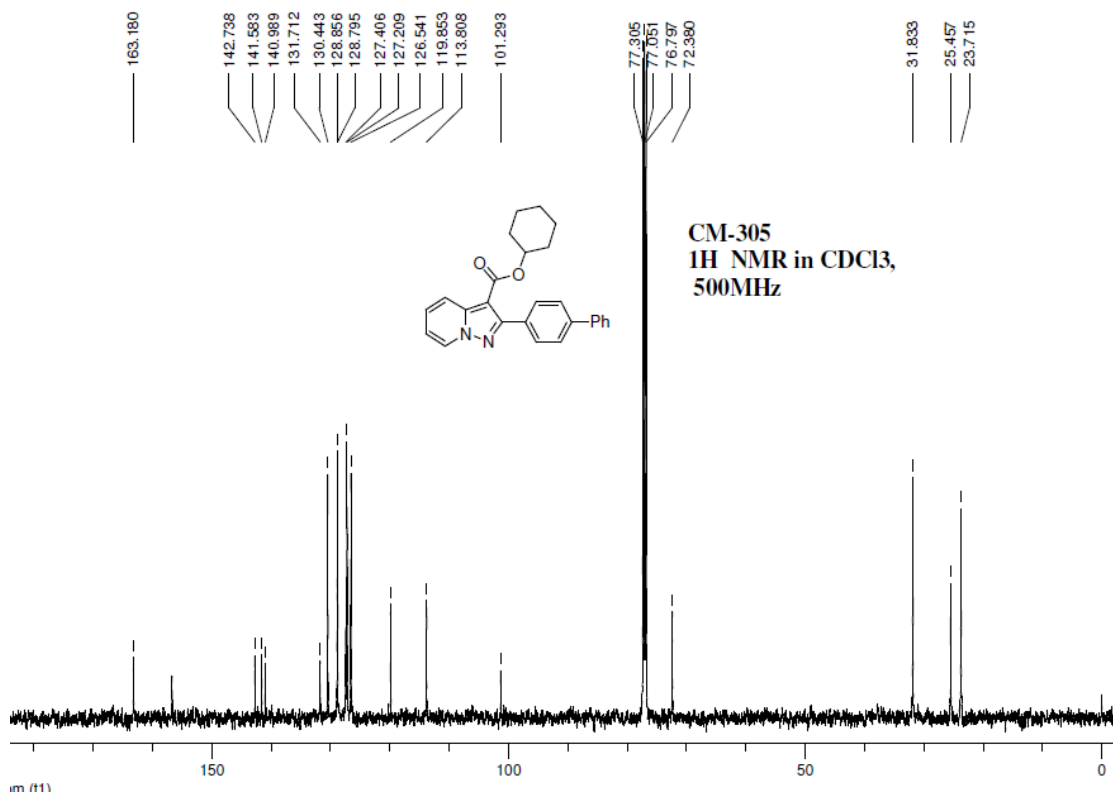

<sup>13</sup>C NMR of **4r**

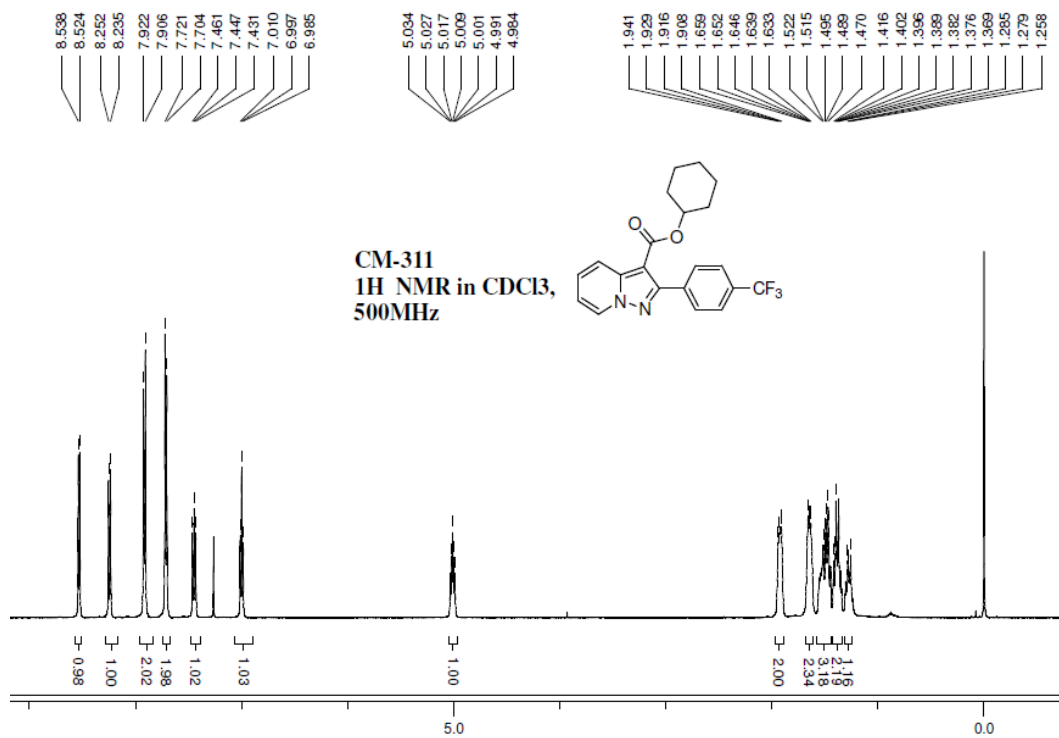

<sup>1</sup>H NMR of **4s**

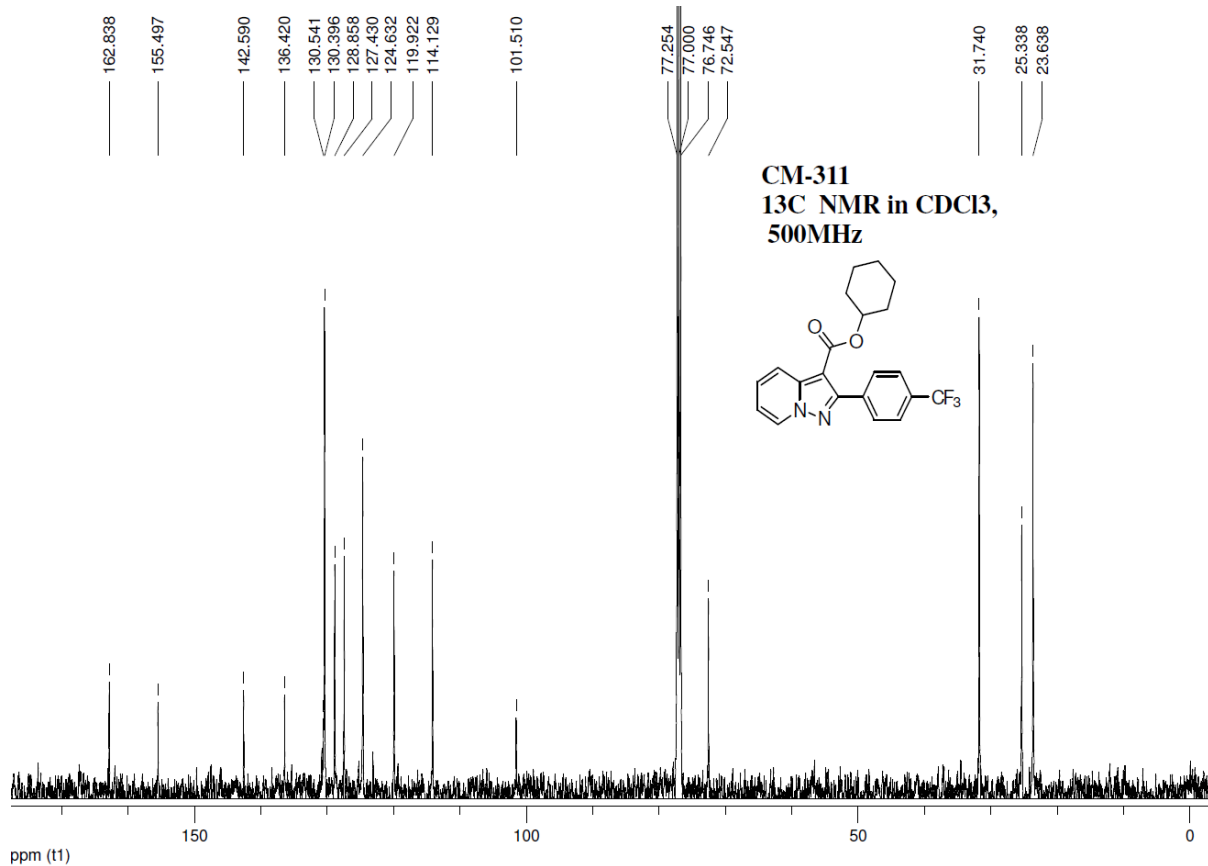

<sup>13</sup>C NMR of **4s**

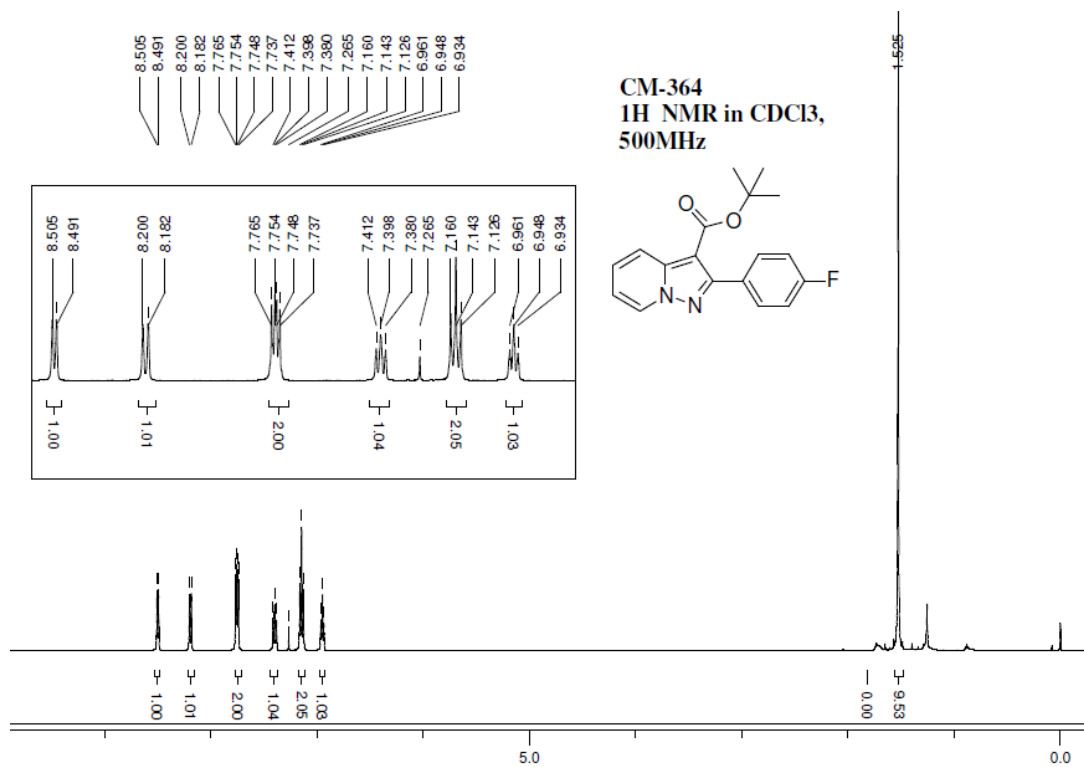

<sup>1</sup>H NMR of 4t

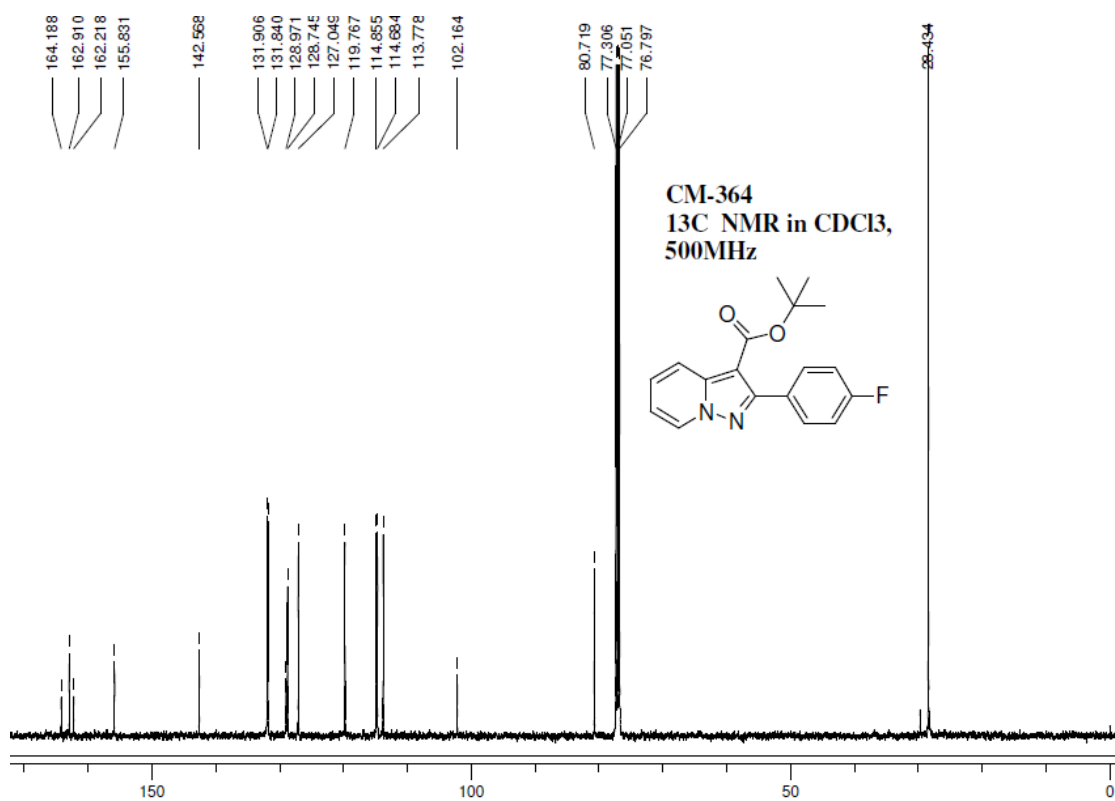

<sup>13</sup>C NMR of 4t



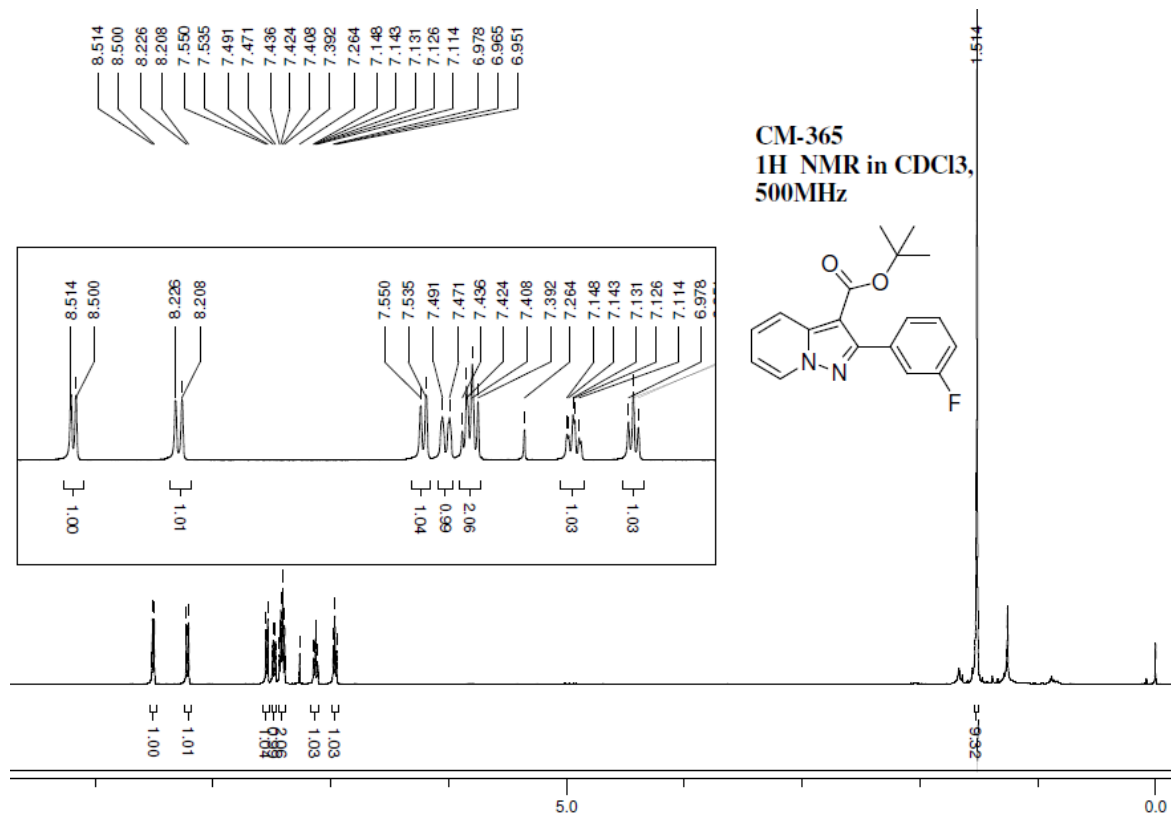

<sup>1</sup>H NMR of **4u**

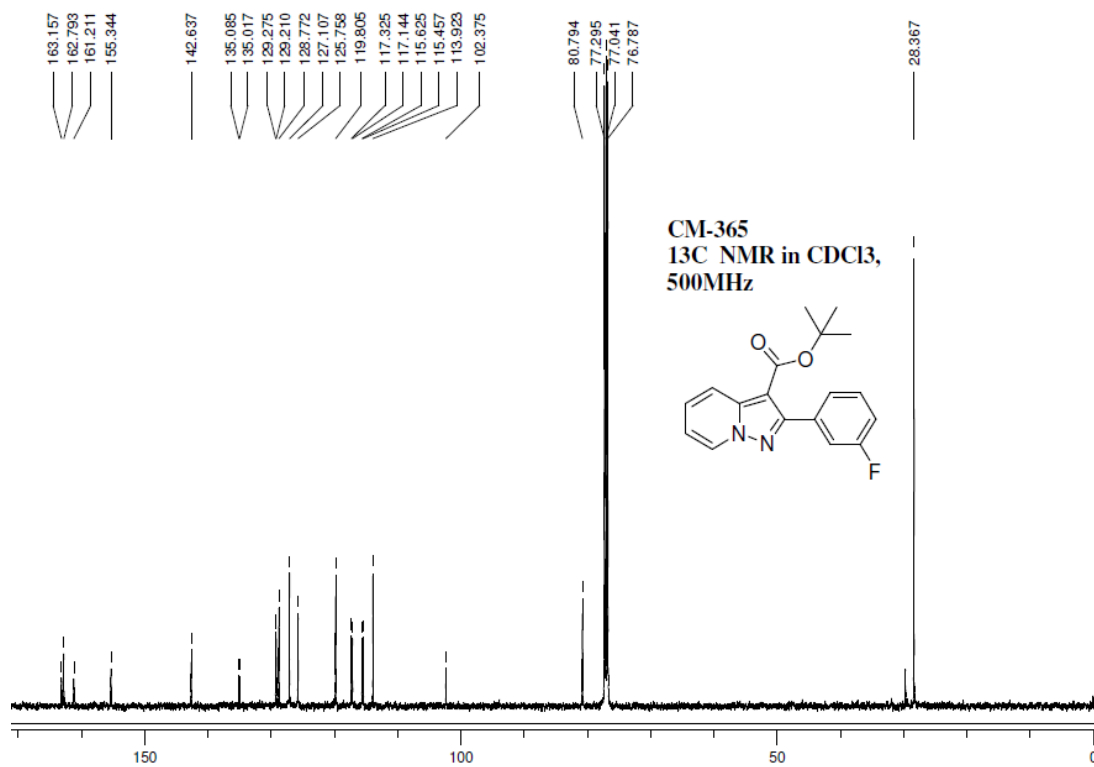

<sup>13</sup>C NMR of **4u**

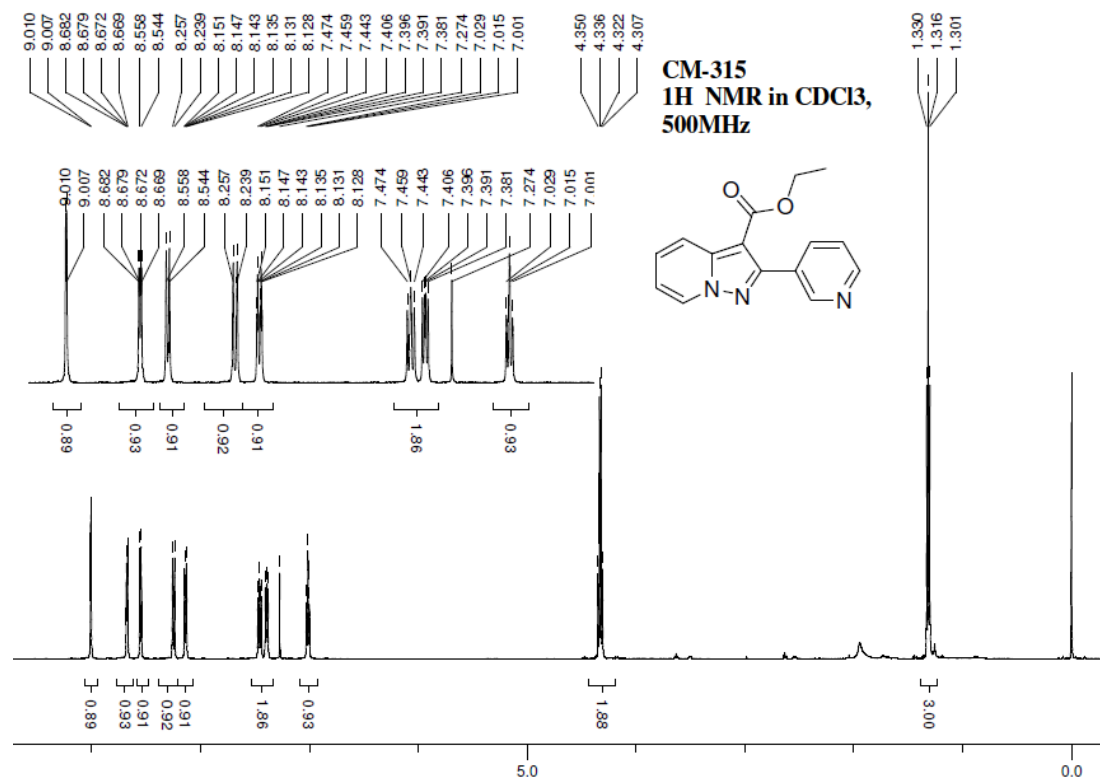

<sup>1</sup>H NMR of **4v**

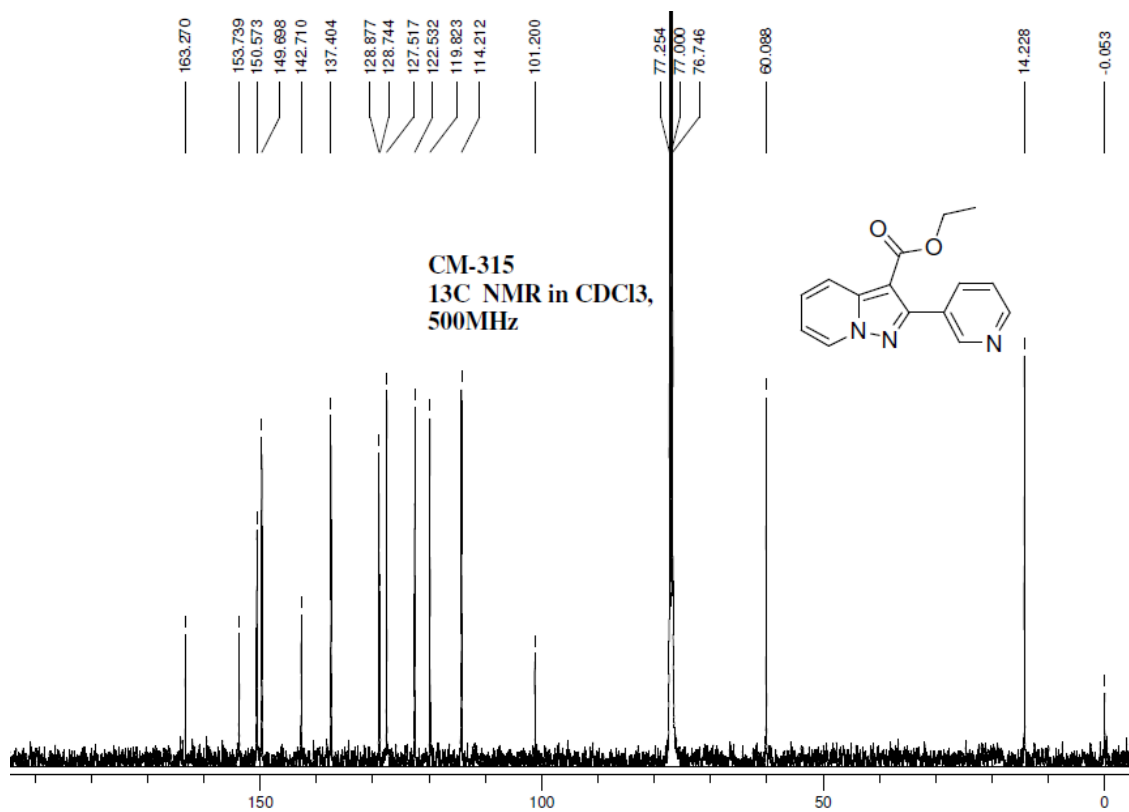

<sup>13</sup>C NMR of **4v**

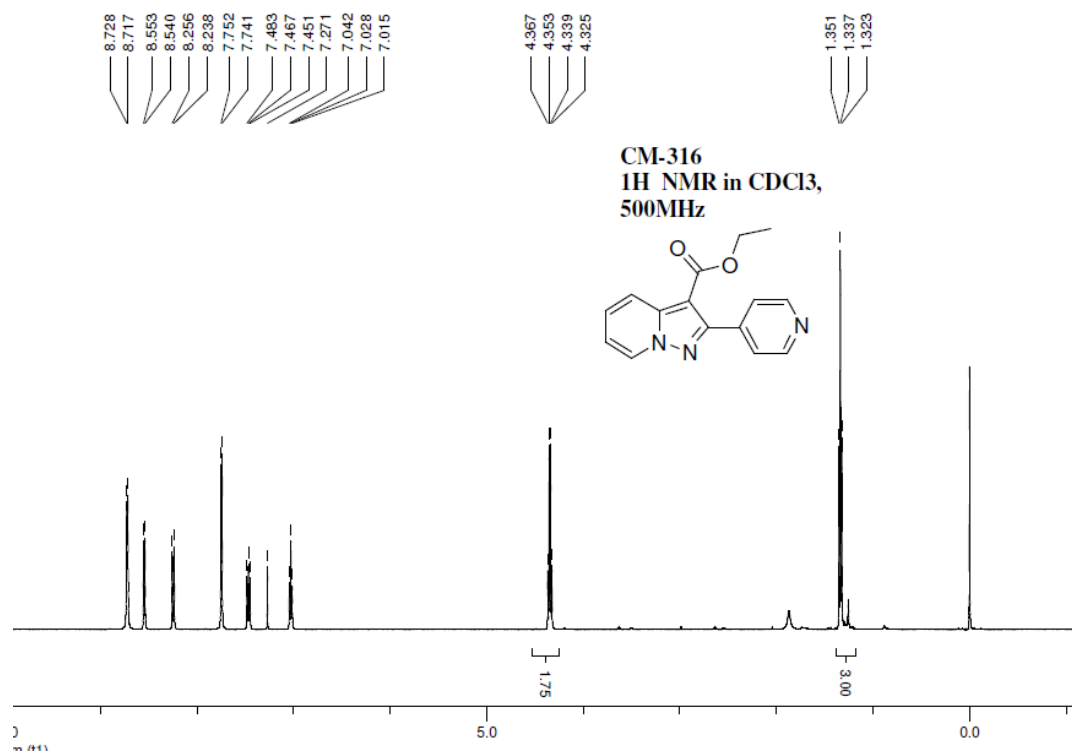

<sup>1</sup>H NMR of **4w**

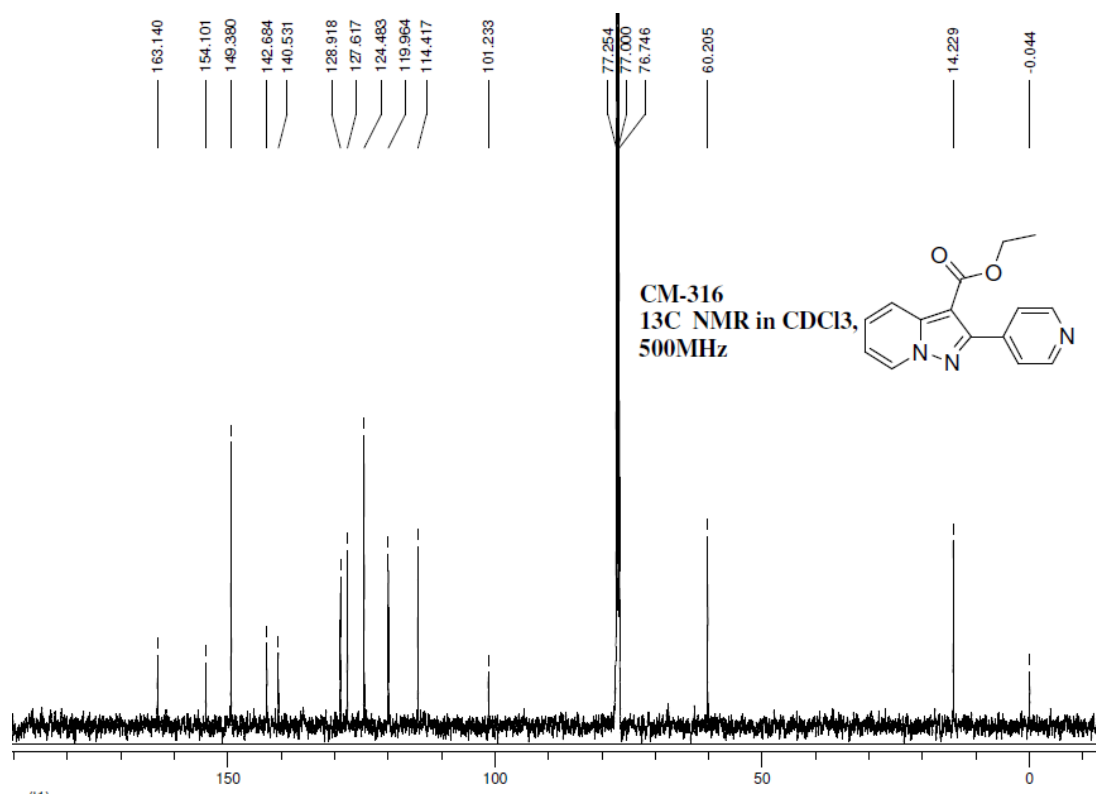

<sup>13</sup>C NMR of **4w**

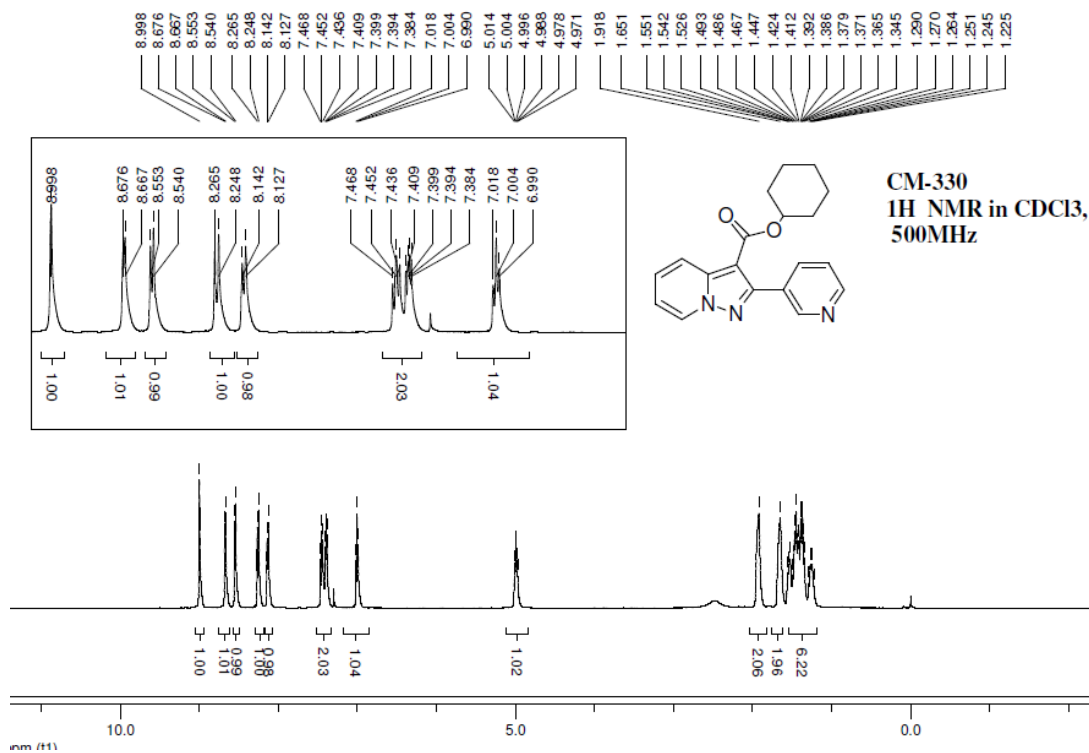

<sup>1</sup>H NMR of **4x**

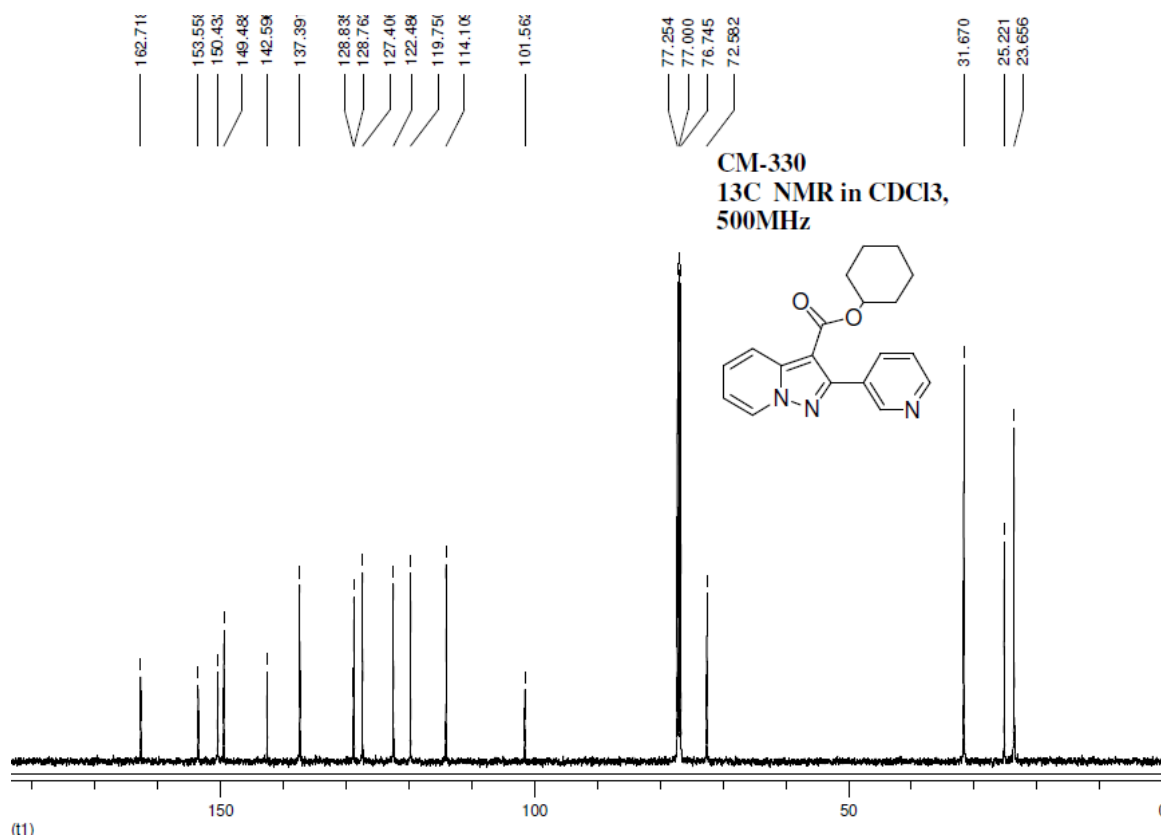

<sup>13</sup>C NMR of **4x**

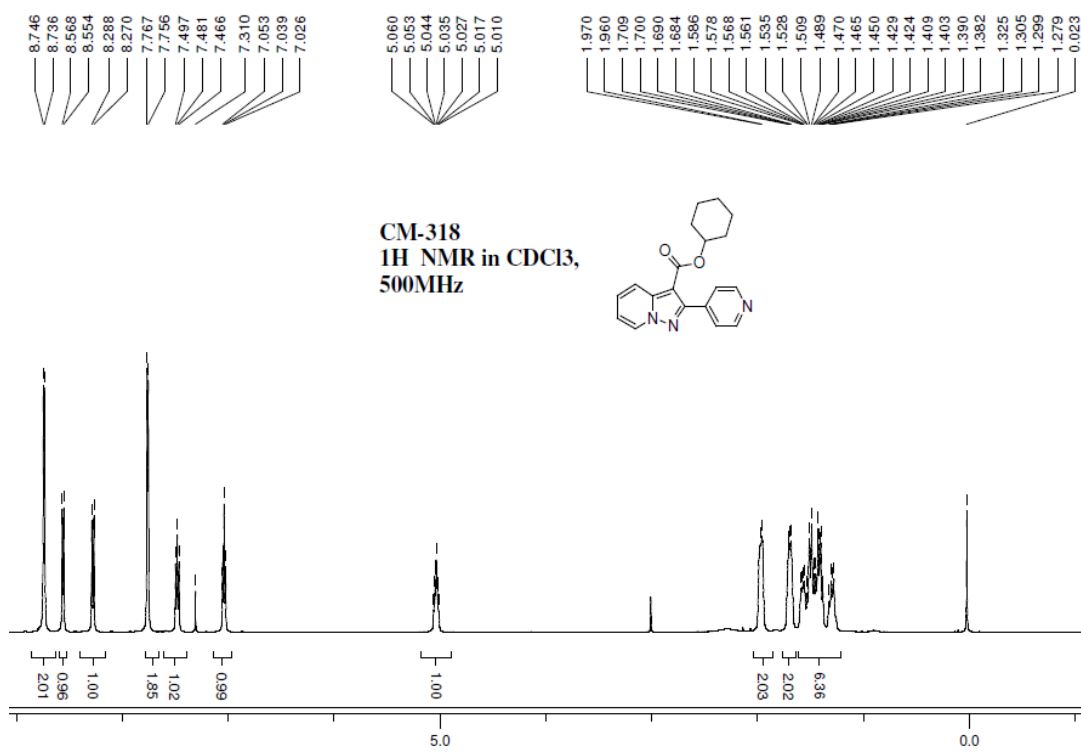

<sup>1</sup>H NMR of **4y**

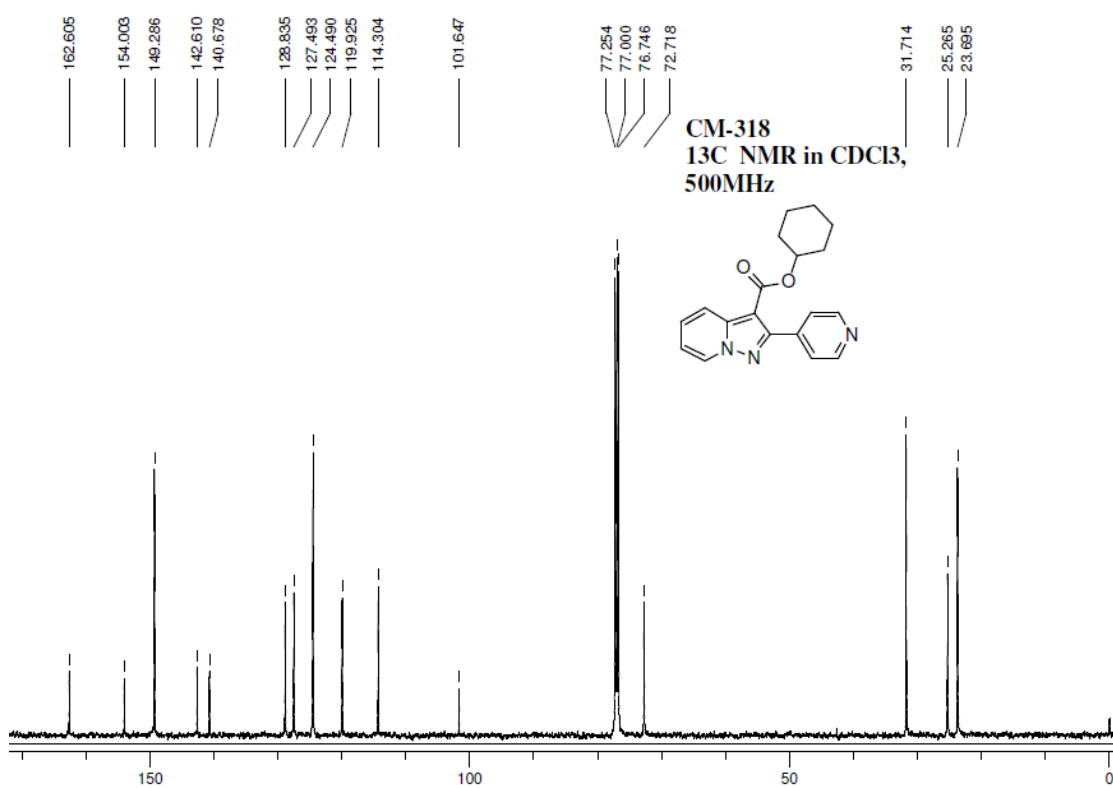

<sup>13</sup>C NMR of **4y**

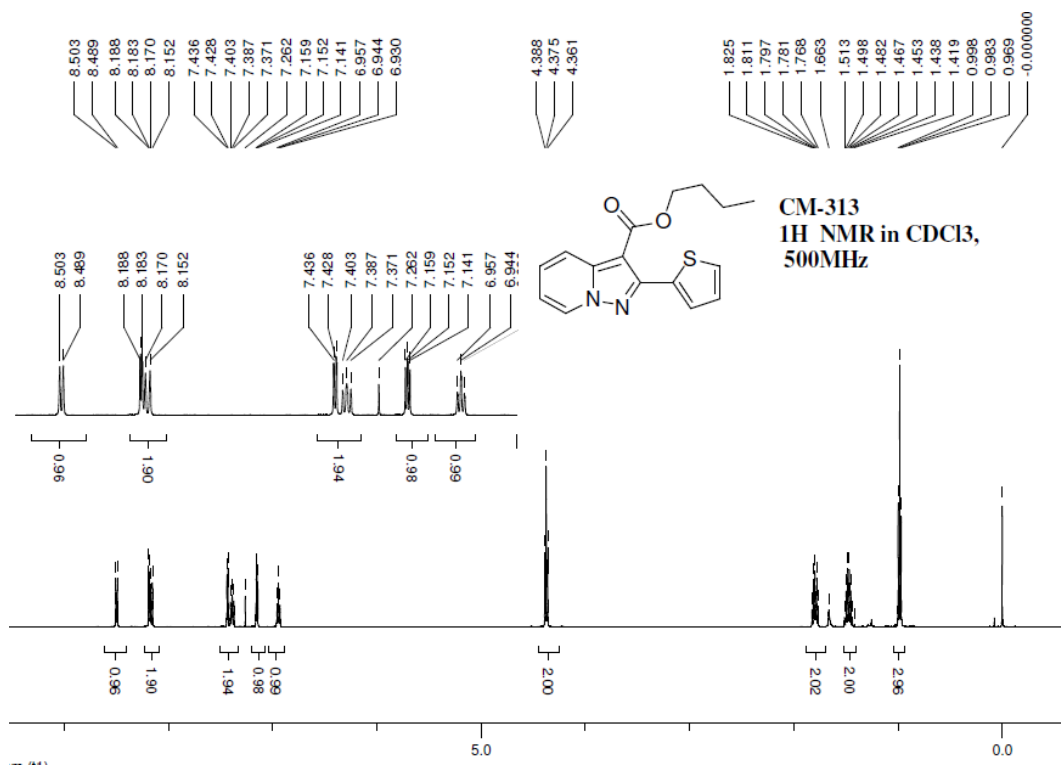

<sup>1</sup>H NMR of **4z**

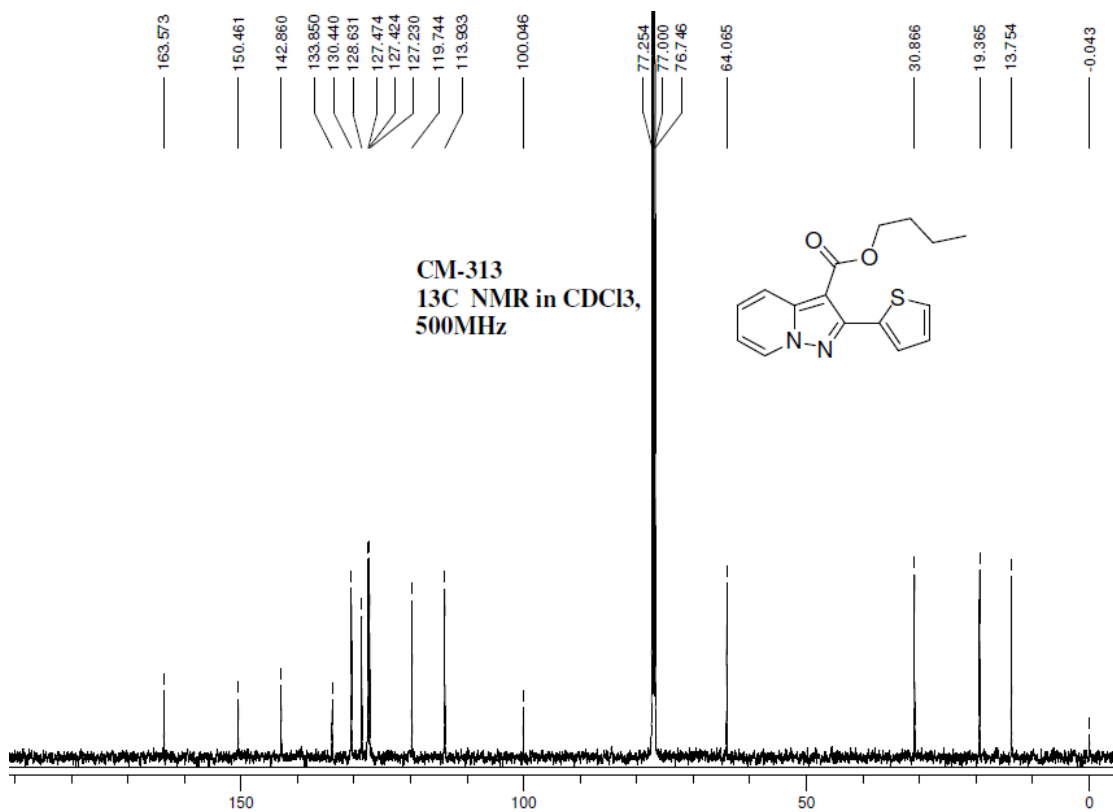

<sup>13</sup>C NMR of **4z**

# HRMS SPECTRA

2C-51-A #77 RT: 1.14 AV: 1 NL: 9.79E7  
F: FTMS (1,1) + p ESI Full ms [100.00-1500.00]

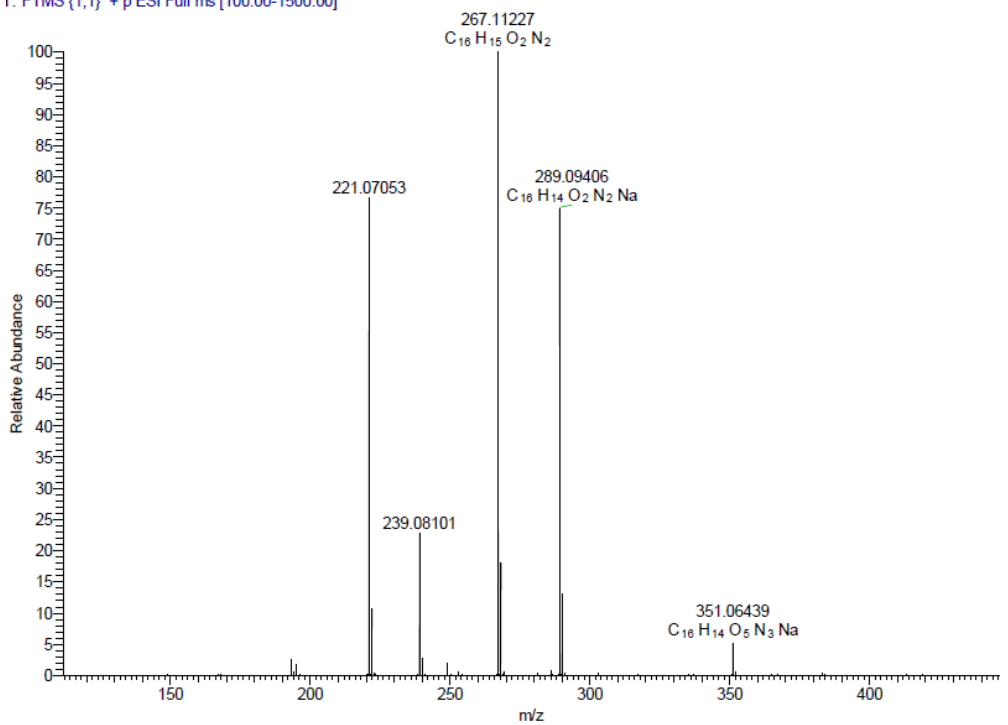

HRMS of 3a

2C-246 #77 RT: 1.14 AV: 1 NL: 1.60E8  
F: FTMS (1,1) + p ESI Full ms [100.00-1500.00]

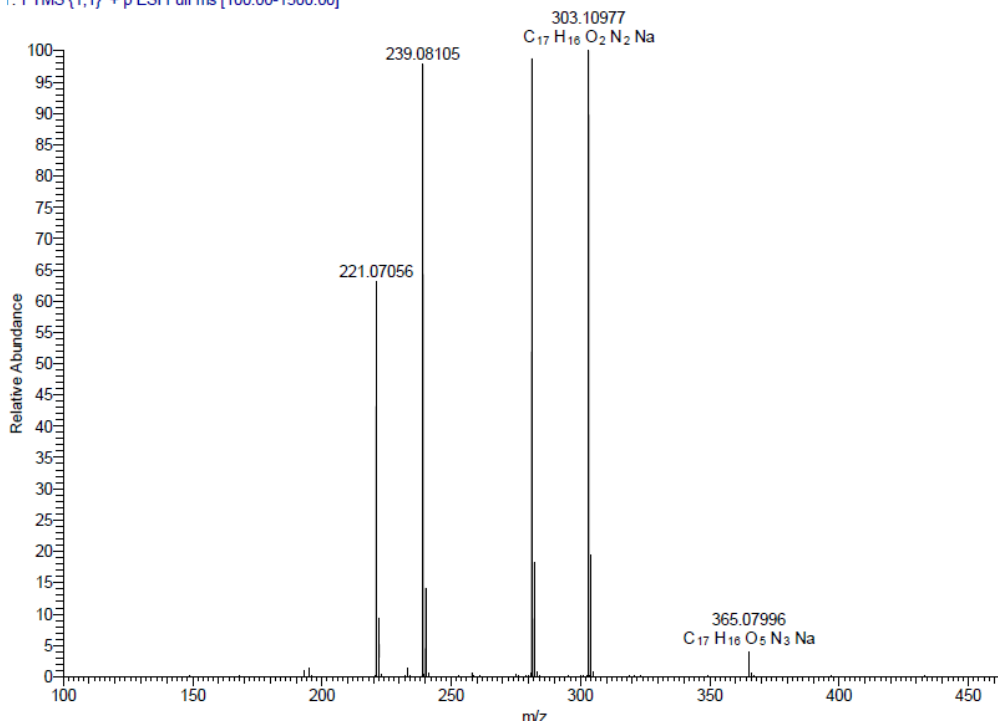

HRMS of 3b



247 #85 RT: 1.20 AV: 1 NL: 9.24E7  
FTMS (1,1) + p ESI Full ms [100.00-1500.00]

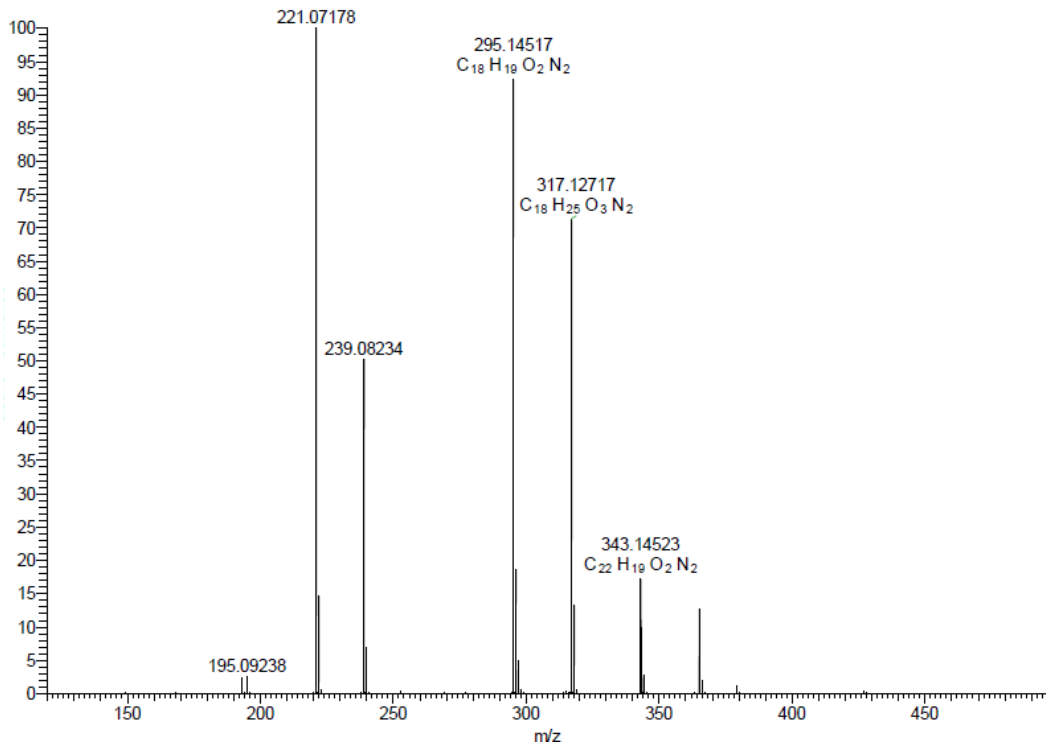

HRMS of 3c

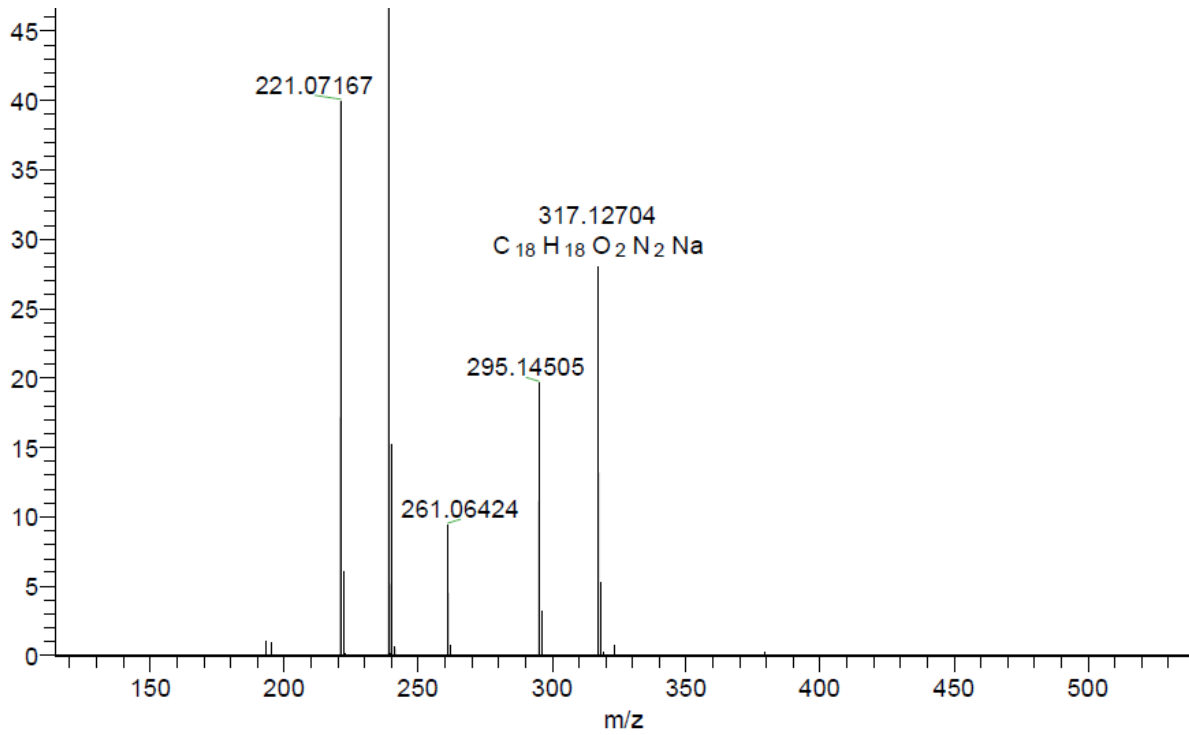

HRMS of 3d

2-245 #87 RT: 1.28 AV: 1 NL: 1.06E8  
FTMS (1,1) + p ESI Full ms [100.00-1500.00]

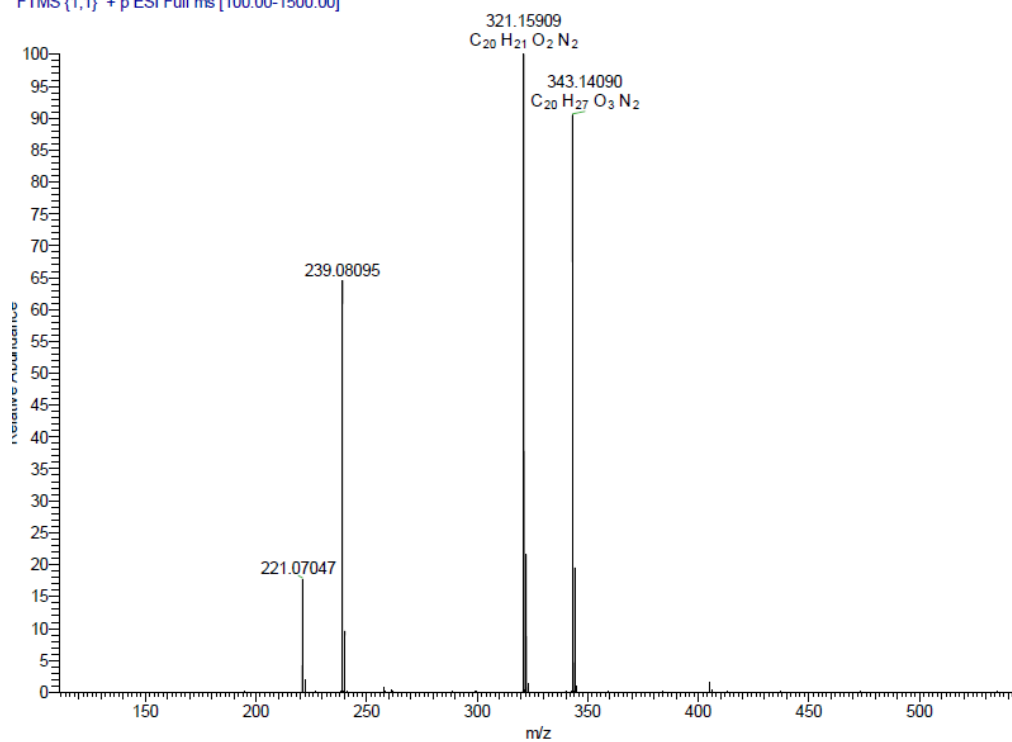

HRMS of 3e

1-1-310 #77 RT: 1.14 AV: 1 NL: 1.21E8  
FTMS (1,1) + p ESI Full ms [100.00-2000.00]

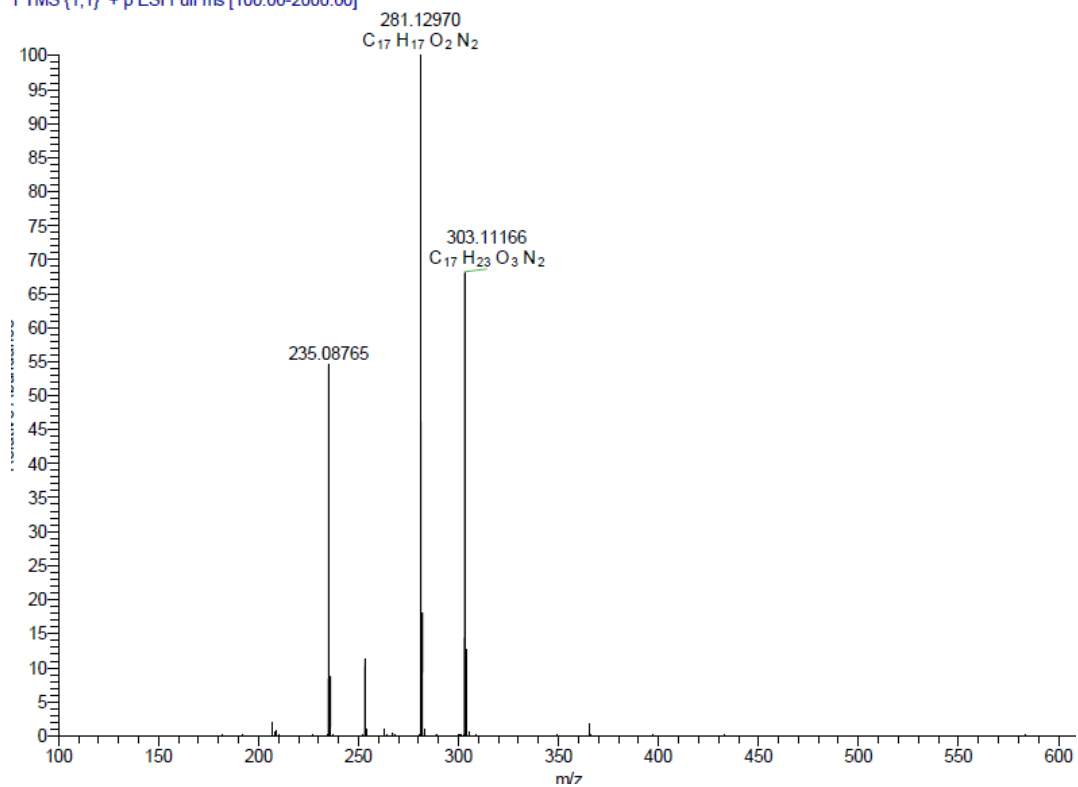

HRMS of 4a

303 #89 RT: 1.25 AV: 1 NL: 9.87E7  
FTMS (1,1) + p ESI Full ms [100.00-1500.00]

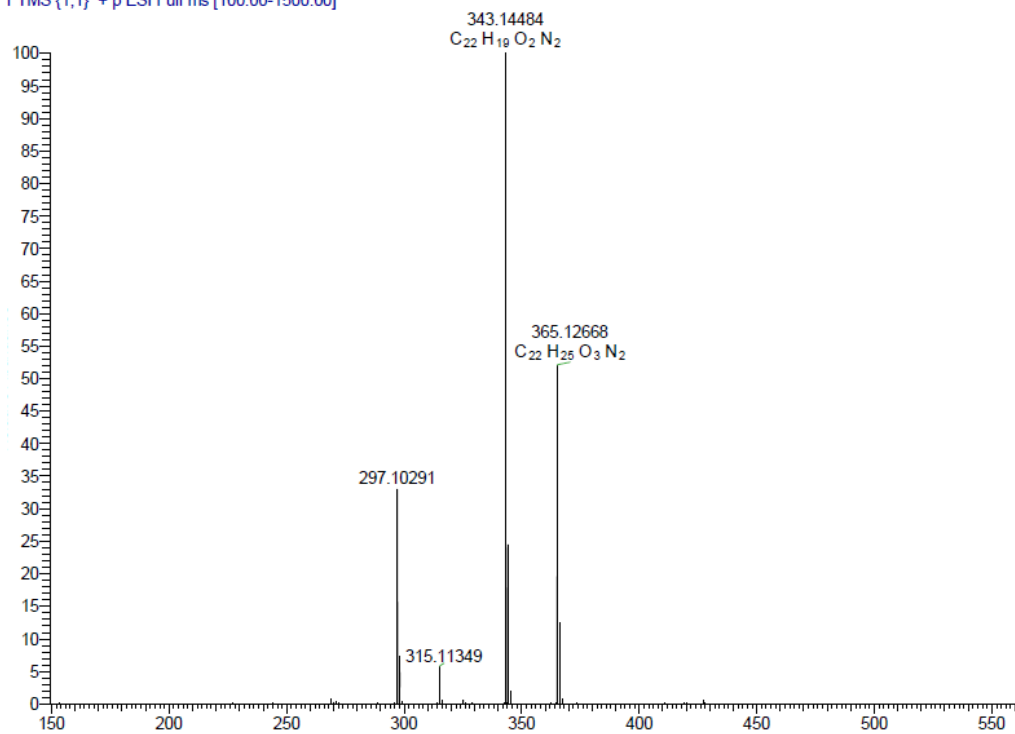

HRMS of 4b

296-A #83 RT: 1.17 AV: 1 NL: 4.68E7  
FTMS (1,1) + p ESI Full ms [100.00-2000.00]

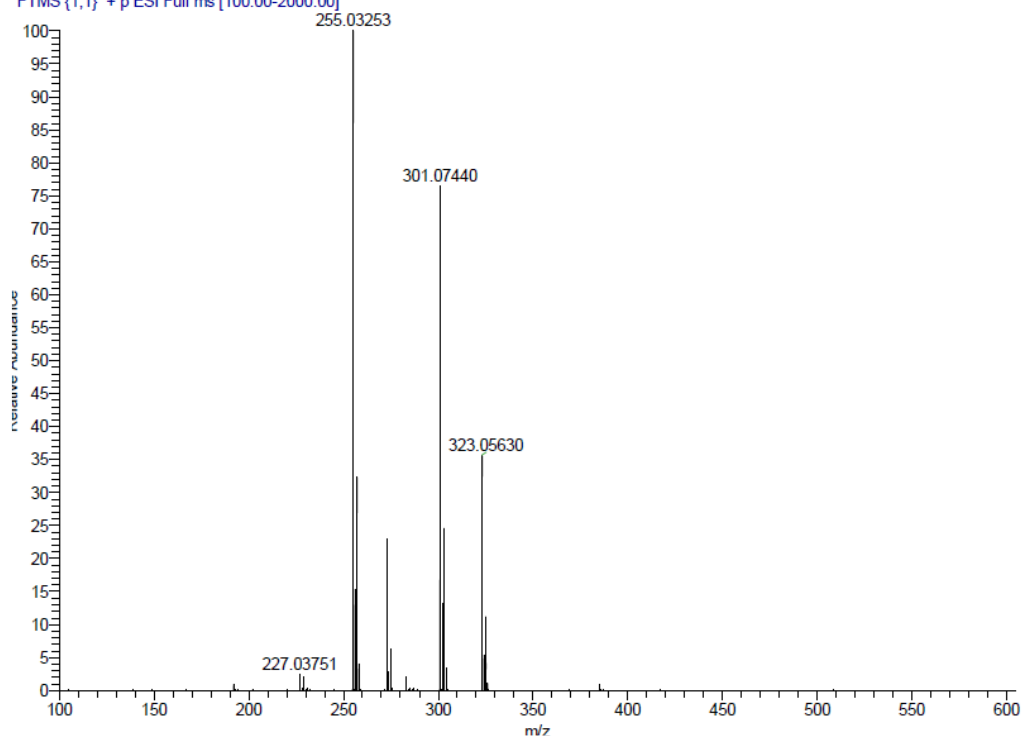

HRMS of 4c

-294 #87 RT: 1.23 AV: 1 NL: 2.62E7  
 TMS (1,1) + p ESI Full ms [100.00-1500.00]

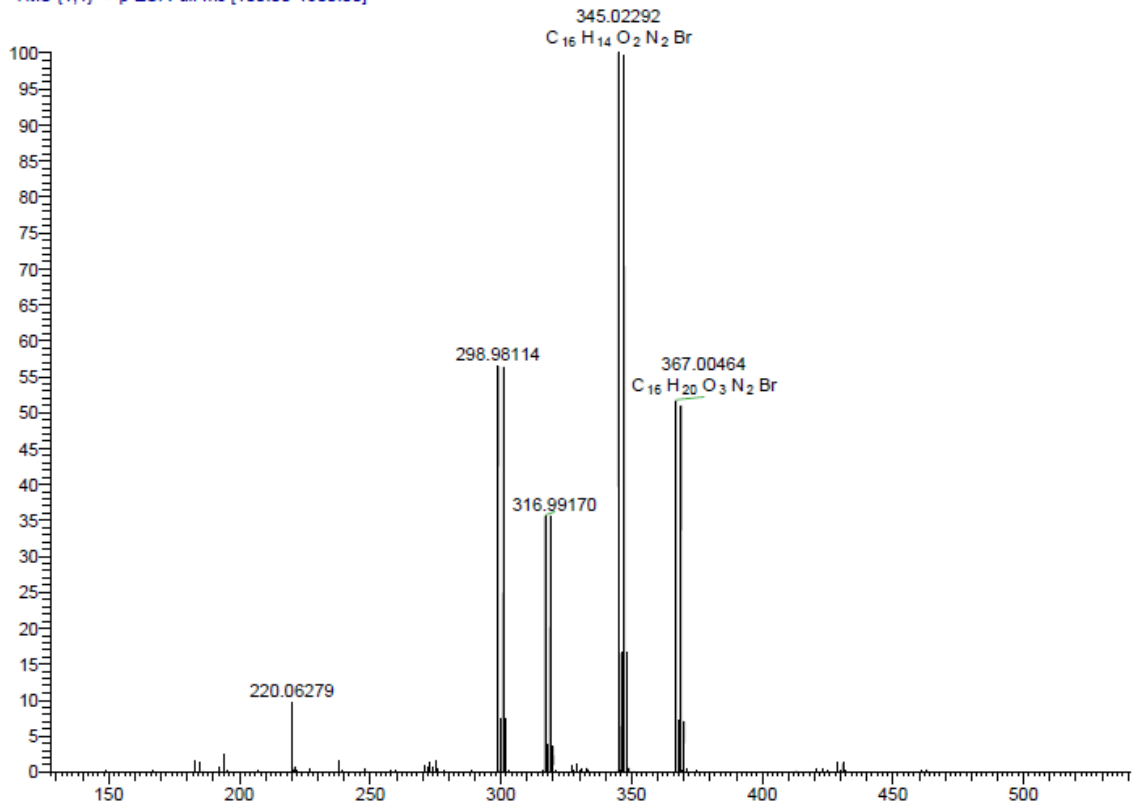

HRMS of 4d

Elemental Composition Report

Single Mass Analysis

Tolerance = 50.0 PPM / DBE: min = -1.5, max = 50.0  
 Element prediction: Off  
 Number of isotope peaks used for i-FIT = 3

Monoisotopic Mass, Even Electron Ions

11 formula(e) evaluated with 1 results within limits (up to 50 closest results for each mass)

Elements Used:

C: 0-17 H: 0-14 N: 0-2 O: 0-2 F: 0-1

CM323 9 (0.125)

1: TOF MS ES+

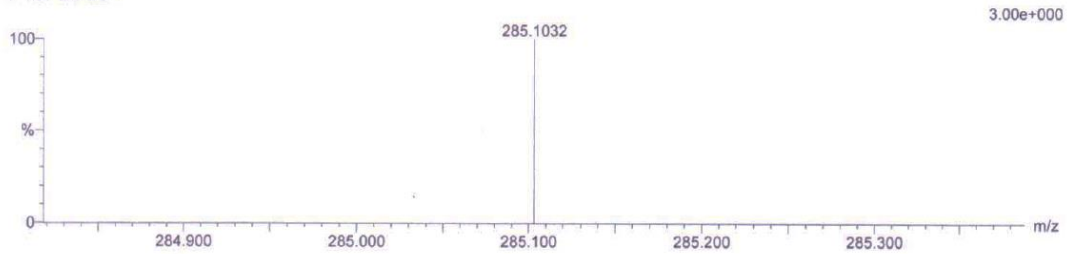

| Mass     | Calc. Mass | mDa  | PPM  | DBE  | i-FIT | Formula                                                         |
|----------|------------|------|------|------|-------|-----------------------------------------------------------------|
| 285.1032 | 285.1039   | -0.7 | -2.5 | 10.5 | n/a   | C <sub>16</sub> H <sub>14</sub> N <sub>2</sub> O <sub>2</sub> F |

HRMS of 4e

1-299 #78 RT: 1.16 AV: 1 NL: 1.01E8

FTMS (1,1) + p ESI Full lock ms [100.00-2000.00]

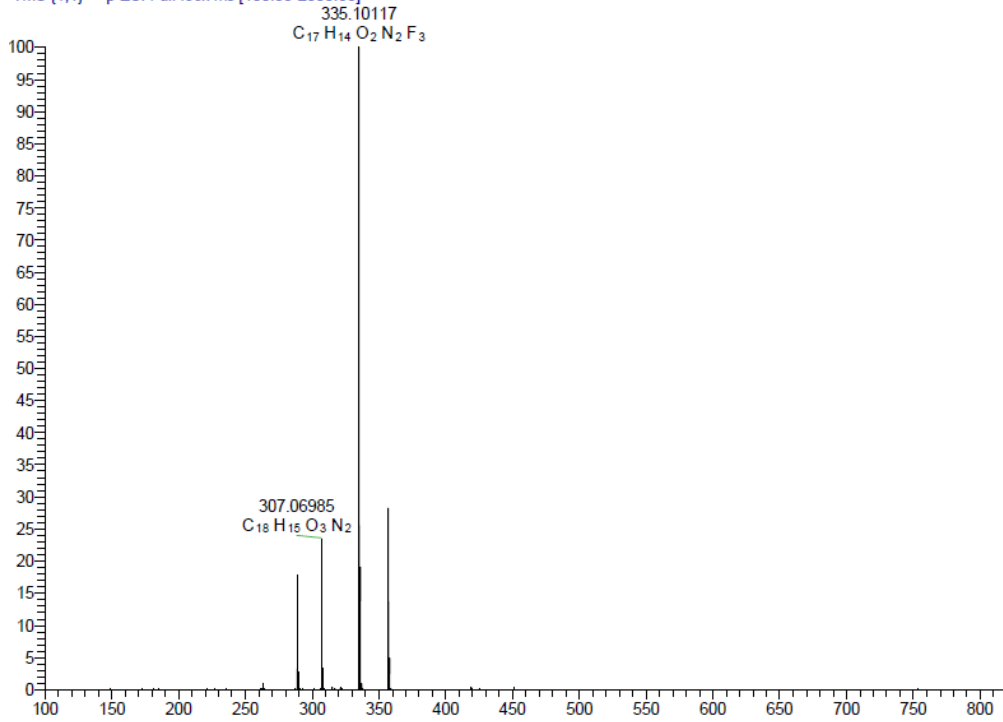

HRMS of 4f

>300 #81 RT: 1.14 AV: 1 NL: 1.05E8

FTMS (1,1) + p ESI Full ms [100.00-1500.00]

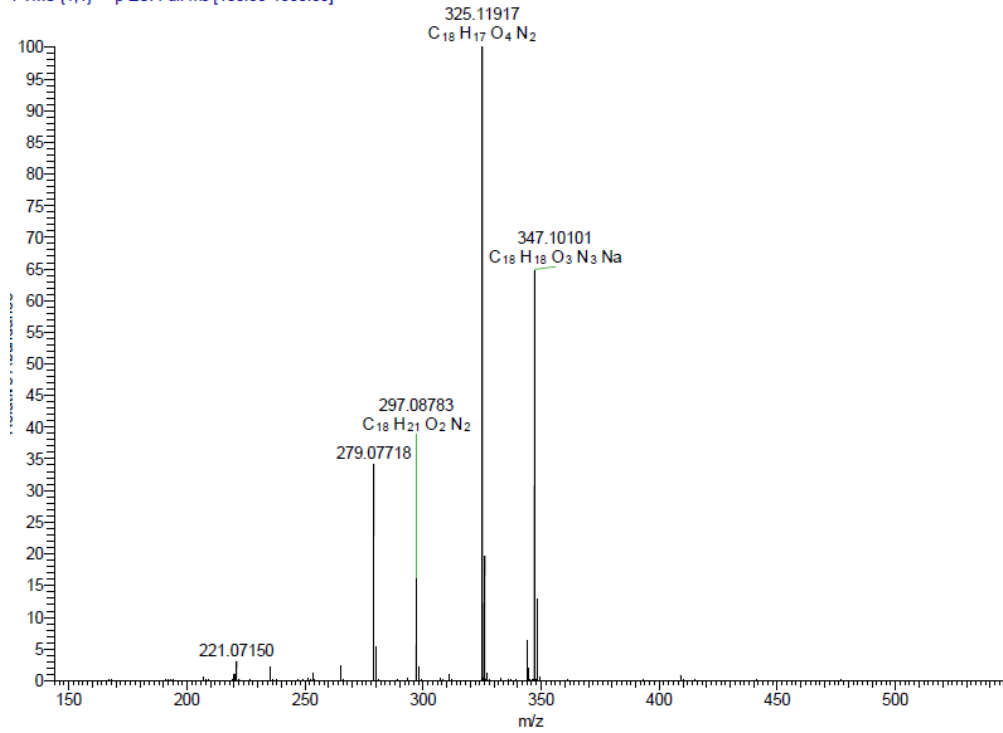

HRMS of 4g

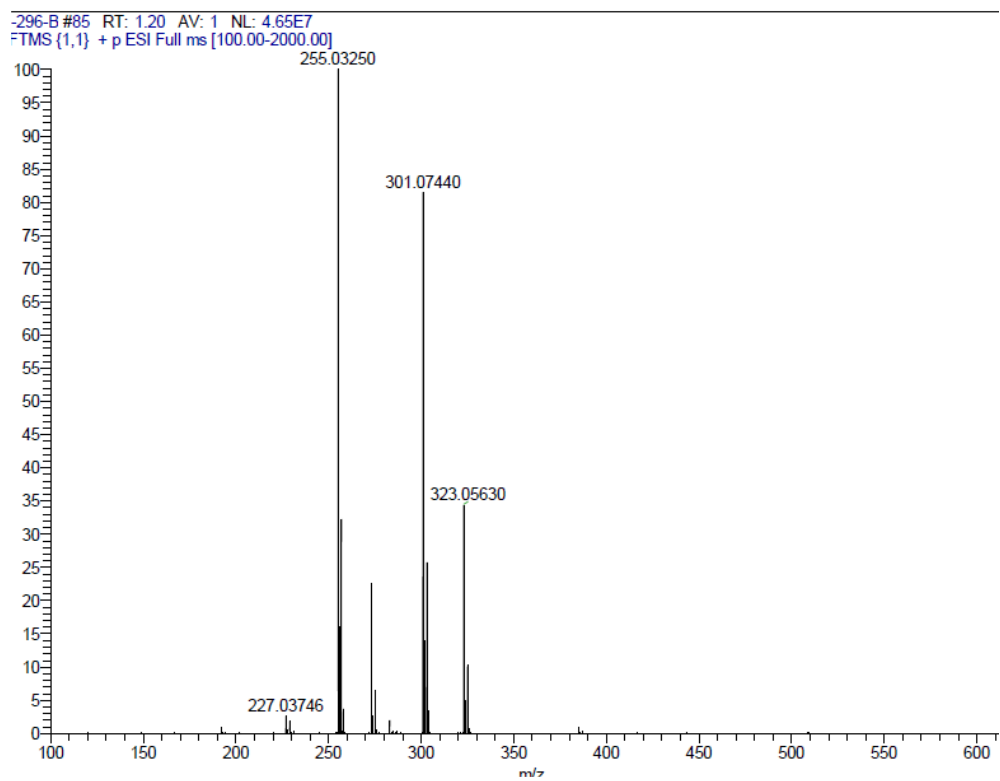

HRMS of 4j

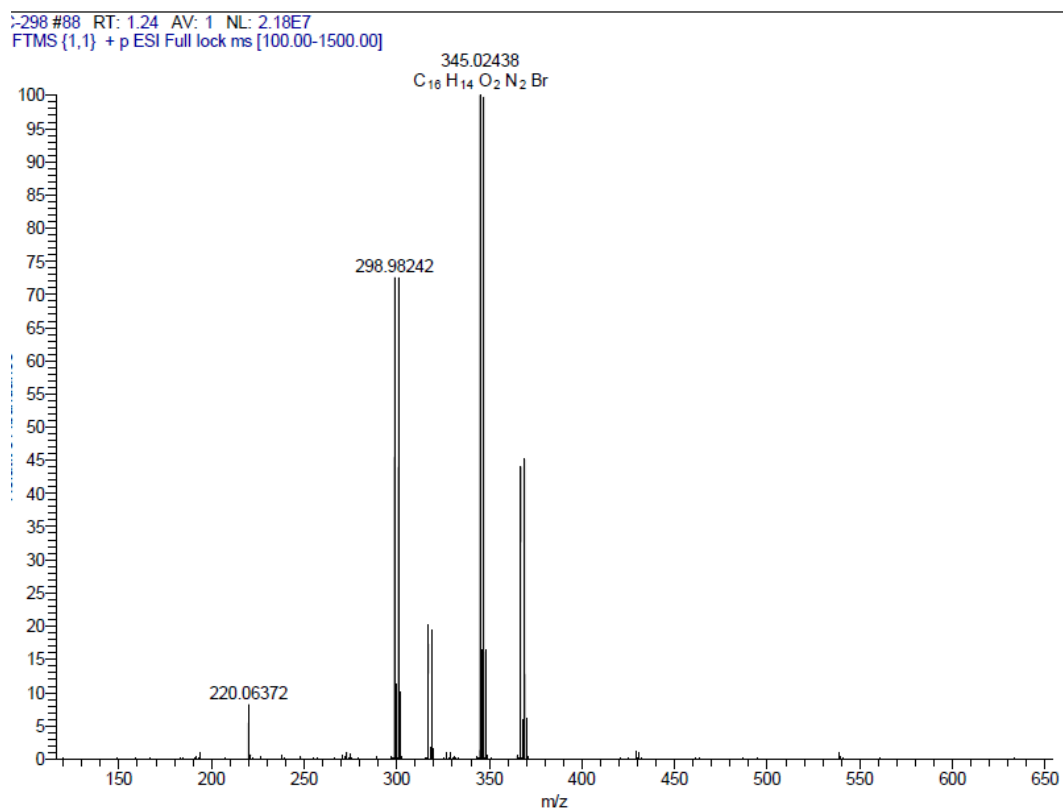

HRMS of 4k

-296-C #85 RT: 1.20 AV: 1 NL: 5.31E7  
 TMS (1,1) + p ESI Full ms [100.00-2000.00]

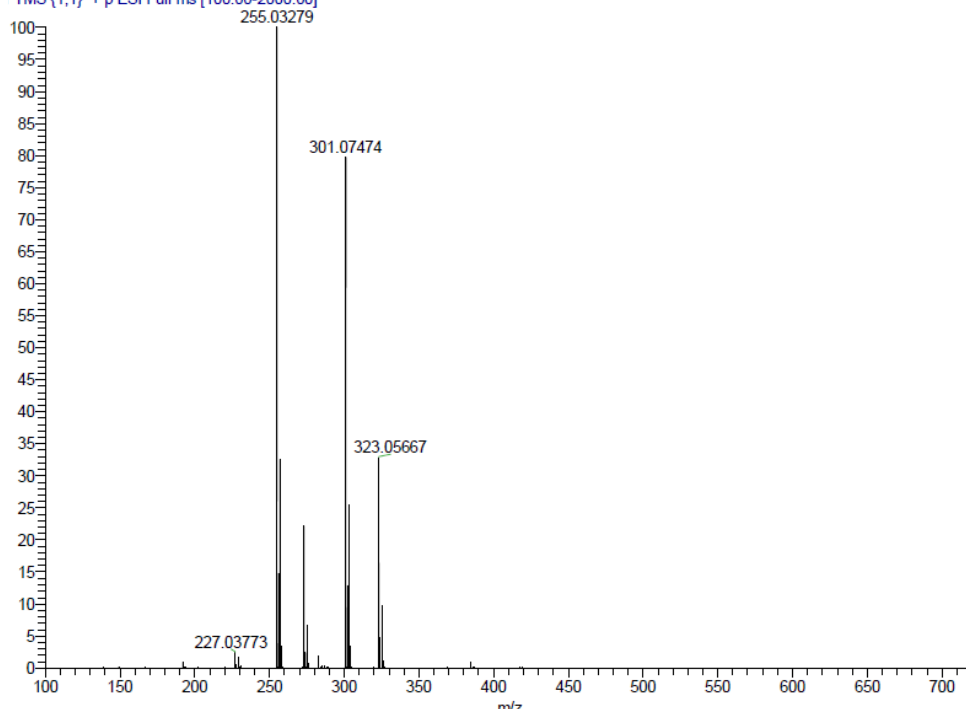

### HRMS of 4l

#### Elemental Composition Report

#### Single Mass Analysis

Tolerance = 50.0 PPM / DBE: min = -1.5, max = 50.0  
 Element prediction: Off  
 Number of isotope peaks used for i-FIT = 3

Monoisotopic Mass, Even Electron Ions

11 formula(e) evaluated with 1 results within limits (up to 50 closest results for each mass)

Elements Used:

C: 0-17 H: 0-14 N: 0-2 O: 0-2 F: 0-1

CM322 10 (0.139)

1: TOF MS ES+

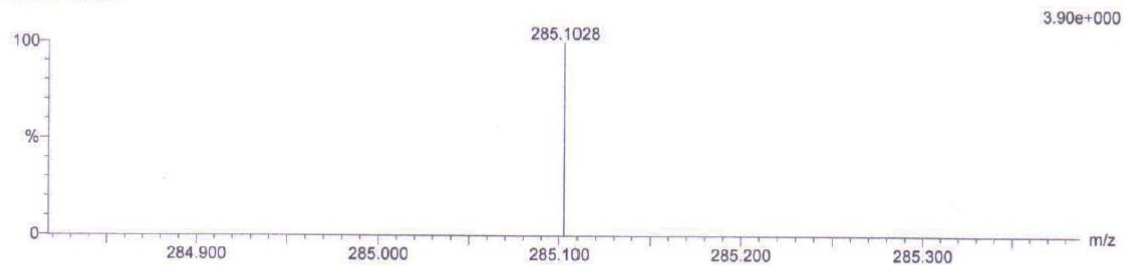

Minimum:  
 Maximum:

5.0 50.0 -1.5  
 50.0 50.0

| Mass     | Calc. Mass | mDa  | PPM  | DBE  | i-FIT | Formula         |
|----------|------------|------|------|------|-------|-----------------|
| 285.1028 | 285.1039   | -1.1 | -3.9 | 10.5 | n/a   | C16 H14 N2 O2 F |

### HRMS of 4m

317 #84 RT: 1.24 AV: 1 NL: 2.14E7  
TMS {1,1} + p ESI Full lock ms [100.00-2000.00]

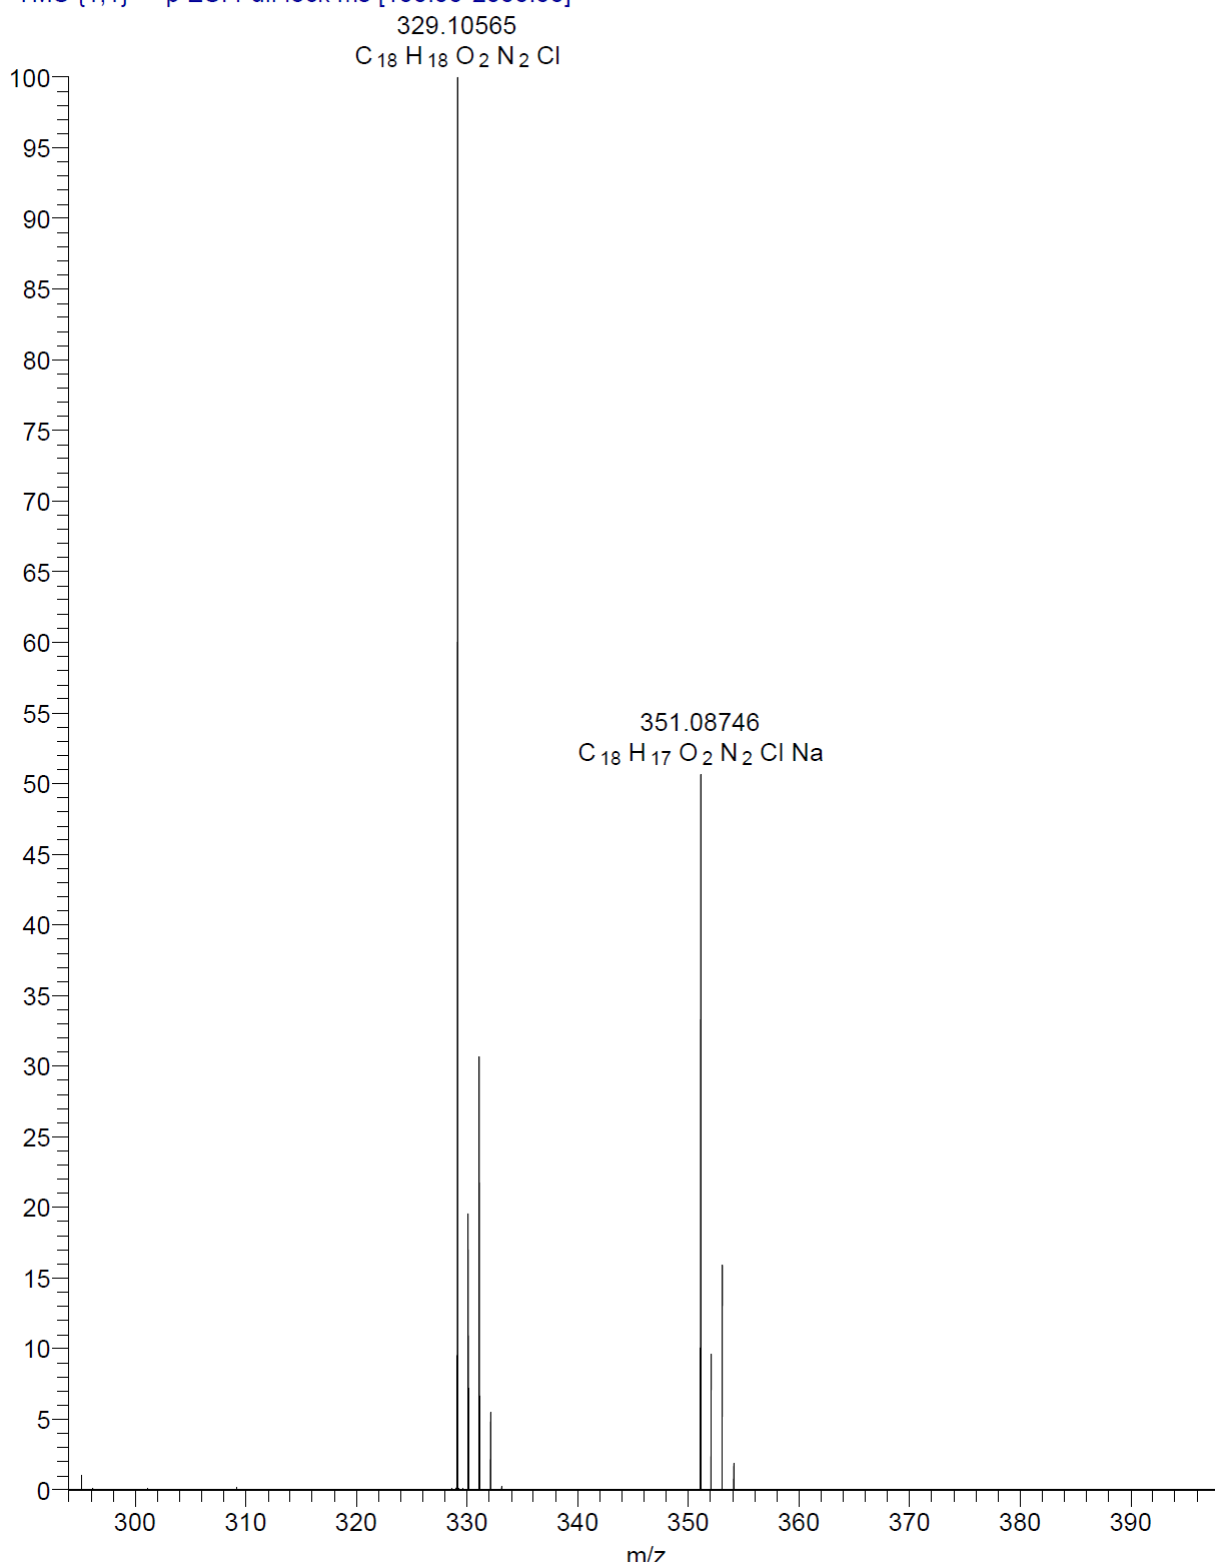

HRMS of 4n



-1-295 #86 RT: 1.27 AV: 1 NL: 5.19E7  
FTMS (1,1) + p ESI Full lock ms [100.00-2000.00]

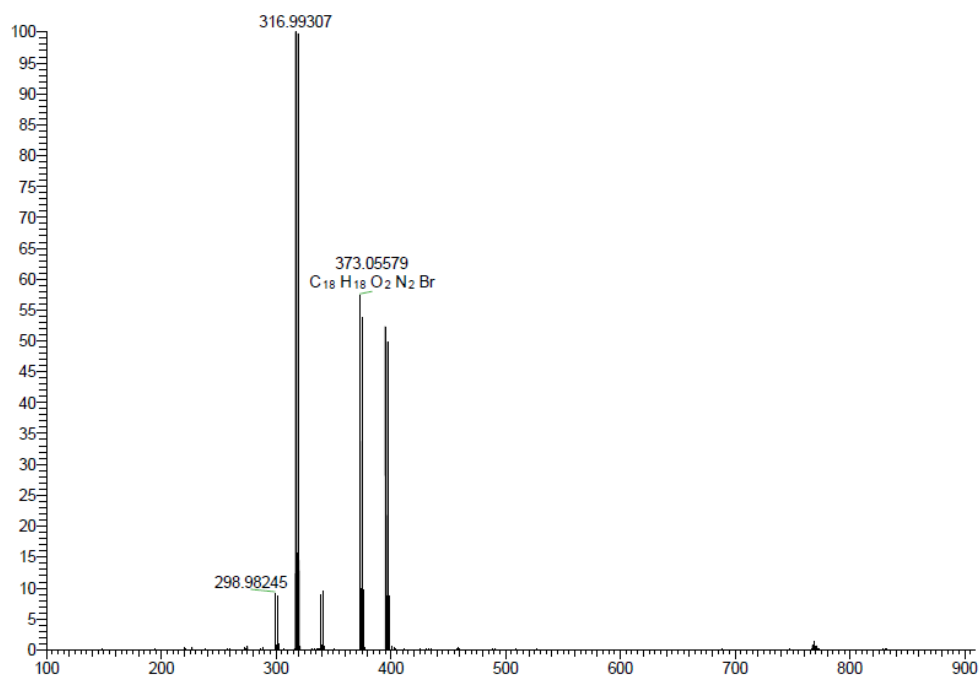

HRMS of 4o

✓VK-122 #86 RT: 1.28 AV: 1 NL: 3.30E7  
FTMS (1,1) + p ESI Full lock ms [200.00-4000.00]

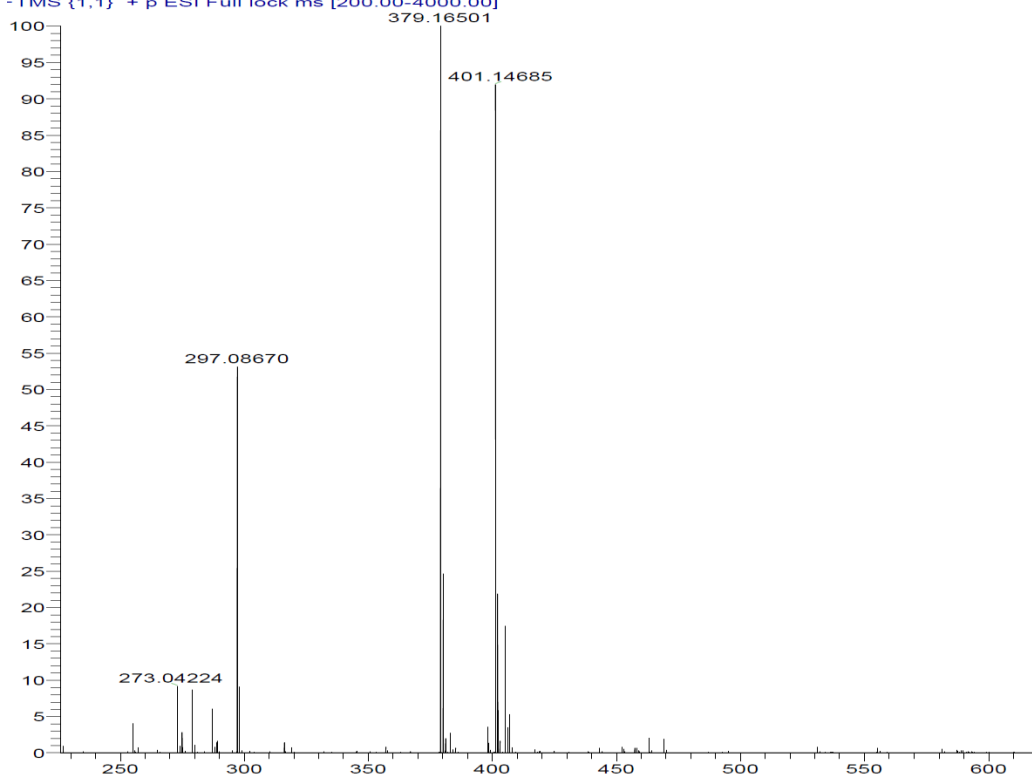

HRMS of 4p

1-302 #80 RT: 1.19 AV: 1 NL: 1.16E8  
FTMS (1,1) + p ESI Full ms [100.00-2000.00]

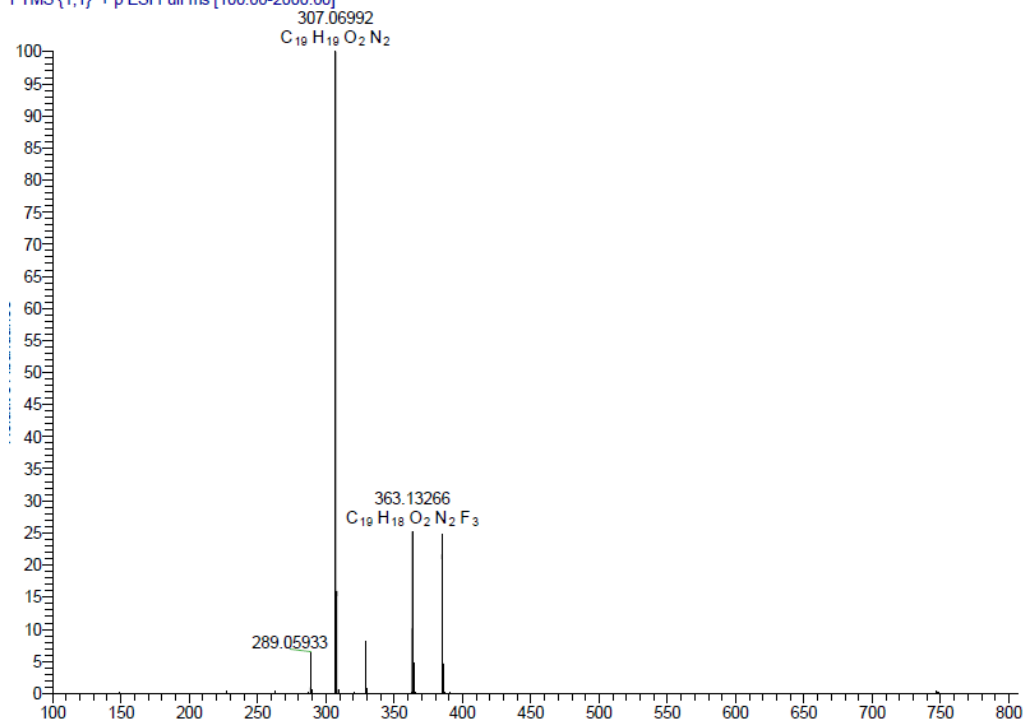

HRMS of 4q

305 #99 RT: 1.47 AV: 1 NL: 2.14E7  
TMS (1,1) + p ESI Full lock ms [100.00-2000.00]

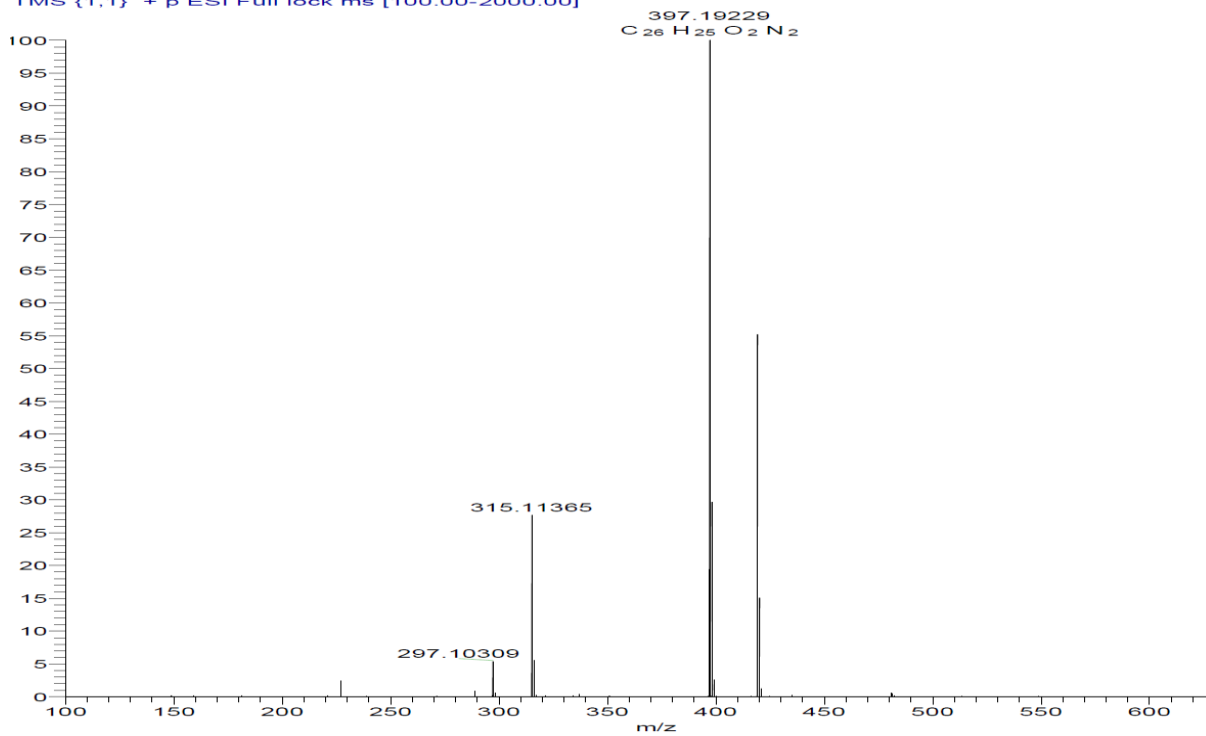

HRMS of 4r

1-311 #86 RT: 1.28 AV: 1 NL: 5.87E7  
 TMS (1,1) + p ESI Full lock ms [100.00-2000.00]

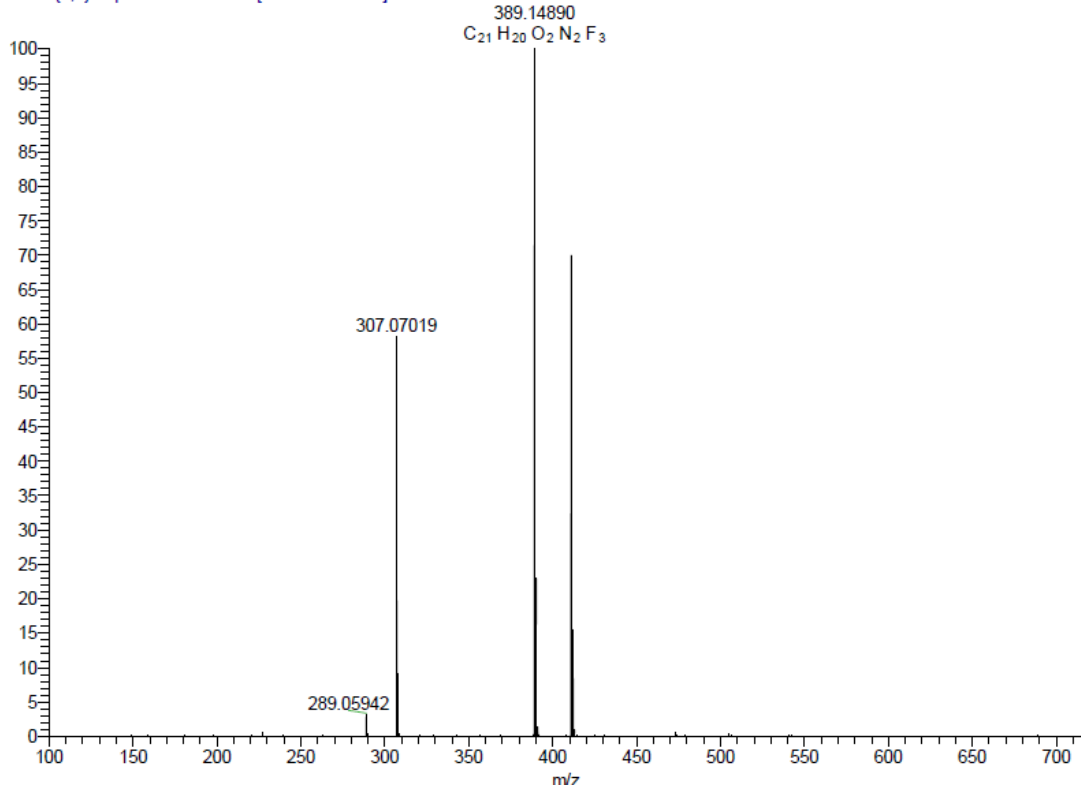

HRMS of 4s

Elemental Composition Report

Single Mass Analysis

Tolerance = 50.0 PPM / DBE: min = -1.5, max = 50.0

Element prediction: Off

Number of isotope peaks used for i-FIT = 3

Monoisotopic Mass, Even Electron Ions

11 formula(e) evaluated with 1 results within limits (up to 50 closest results for each mass)

Elements Used:

C: 0-19 H: 0-18 N: 0-2 O: 0-2 F: 0-1

CM364 9 (0.125)

1: TOF MS ES+

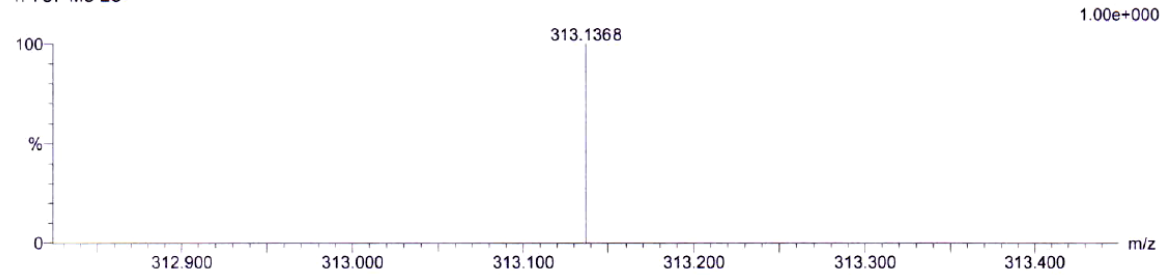

| Mass     | Calc. Mass | mDa | PPM | DBE  | i-FIT | Formula         |
|----------|------------|-----|-----|------|-------|-----------------|
| 313.1368 | 313.1352   | 1.6 | 5.1 | 10.5 | n/a   | C18 H18 N2 O2 F |

HRMS of 4t

### Elemental Composition Report

Page 1

#### Single Mass Analysis

Tolerance = 50.0 PPM / DBE: min = -1.5, max = 50.0

Element prediction: Off

Number of isotope peaks used for i-FIT = 3

Monoisotopic Mass, Even Electron Ions

11 formula(e) evaluated with 1 results within limits (up to 50 closest results for each mass)

Elements Used:

C: 0-19 H: 0-18 N: 0-2 O: 0-2 F: 0-1

CM365 7 (0.097)

1: TOF MS ES+

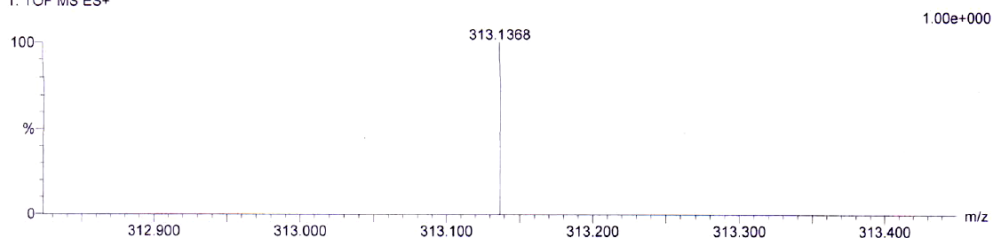

|          |            |      |     |      |       |                 |  |
|----------|------------|------|-----|------|-------|-----------------|--|
| Minimum: |            |      |     | -1.5 |       |                 |  |
| Maximum: | 5.0        | 50.0 |     | 50.0 |       |                 |  |
| Mass     | Calc. Mass | mDa  | PPM | DBE  | i-FIT | Formula         |  |
| 313.1368 | 313.1352   | 1.6  | 5.1 | 10.5 | n/a   | C18 H18 N2 O2 F |  |

### HRMS of 4u

IV-VK-127 #68-76 RT: 1.01-1.12 AV: 9 NL: 1.41E8  
FTMS (1,1) + p ESI Full lock MS [200.00-4000.00]

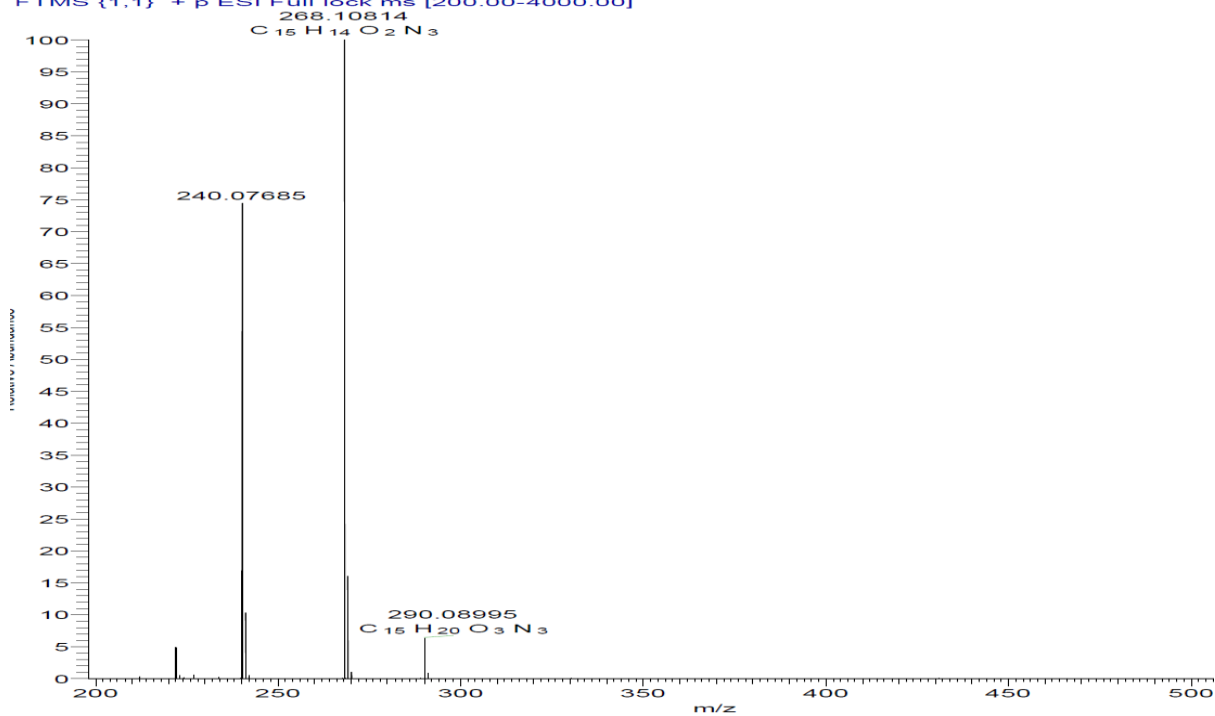

### HRMS of 4v

D-316 #72 RT: 1.07 AV: 1 NL: 1.90E8  
 FTMS (1,1) + p ESI Full ms [100.00-1500.00]

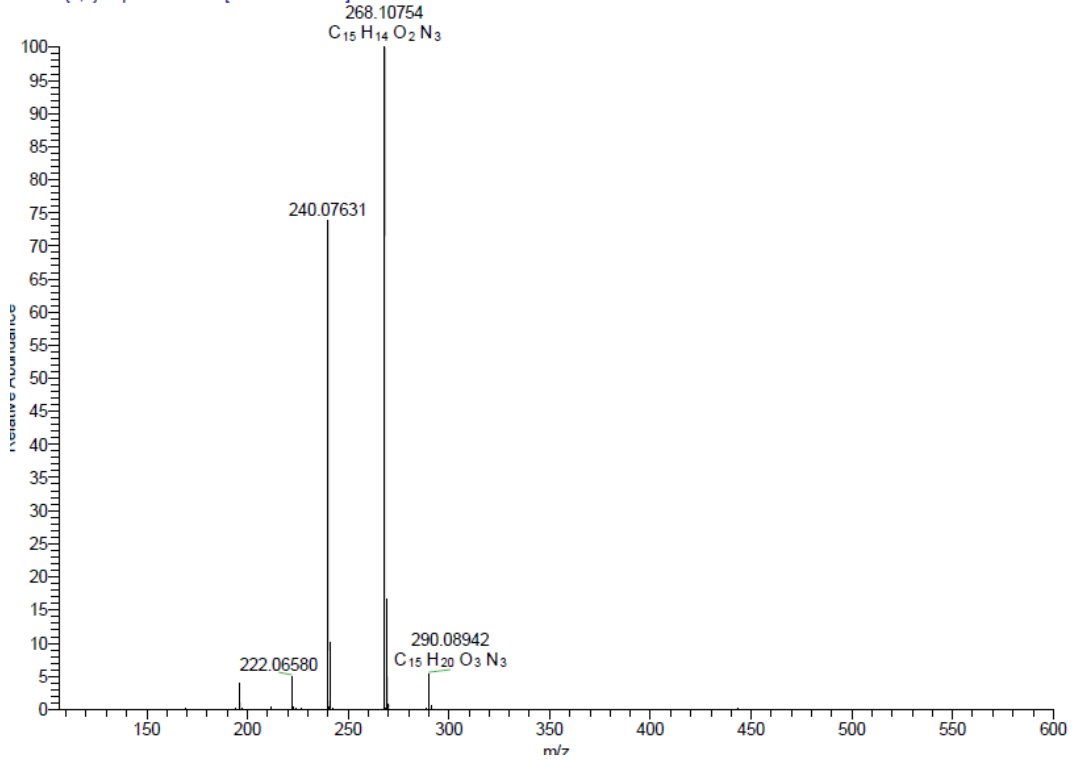

### HRMS of 4w

#### Elemental Composition Report

#### Single Mass Analysis

Tolerance = 50.0 PPM / DBE: min = -1.5, max = 50.0  
 Element prediction: Off  
 Number of isotope peaks used for i-FIT = 3

Monoisotopic Mass, Even Electron Ions

5 formula(e) evaluated with 1 results within limits (up to 50 closest results for each mass)

Elements Used:

C: 0-20 H: 0-20 N: 0-3 O: 0-2

CM330 6 (0.083)

1: TOF MS ES+

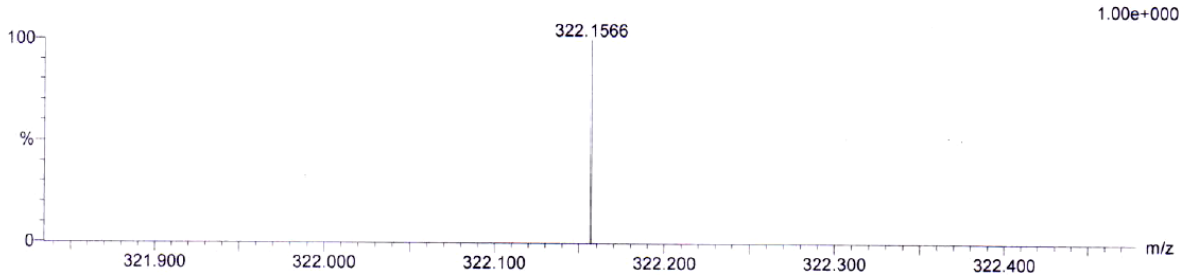

| Mass     | Calc. Mass | mDa | PPM | DBE  | i-FIT | Formula                                                       |
|----------|------------|-----|-----|------|-------|---------------------------------------------------------------|
| 322.1566 | 322.1556   | 1.0 | 3.1 | 11.5 | n/a   | C <sub>19</sub> H <sub>20</sub> N <sub>3</sub> O <sub>2</sub> |

### HRMS of 4x

IV-VK-108 #80 RT: 1.19 AV: 1 NL: 2.05E8  
FTMS (1,1) + p ESI Full ms [200.00-4000.00]

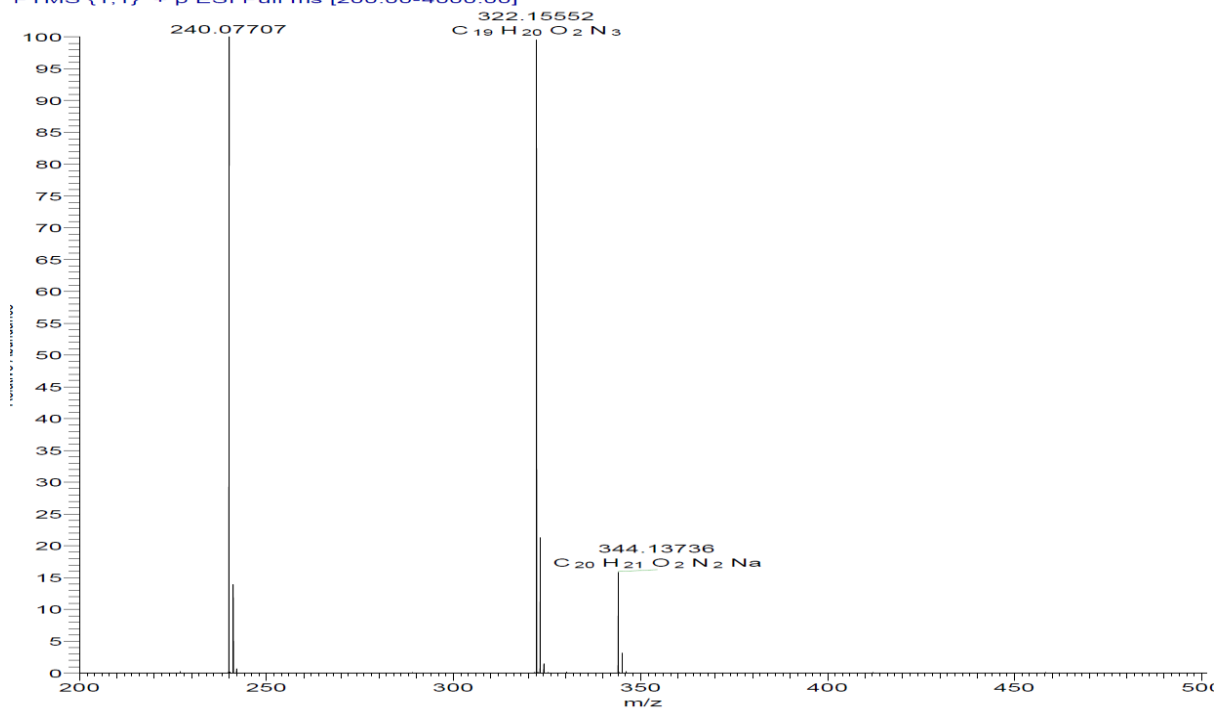

HRMS of 4y

C-313 #83 RT: 1.24 AV: 1 NL: 3.11E7  
FTMS (1,1) + p ESI Full ms [100.00-1500.00]

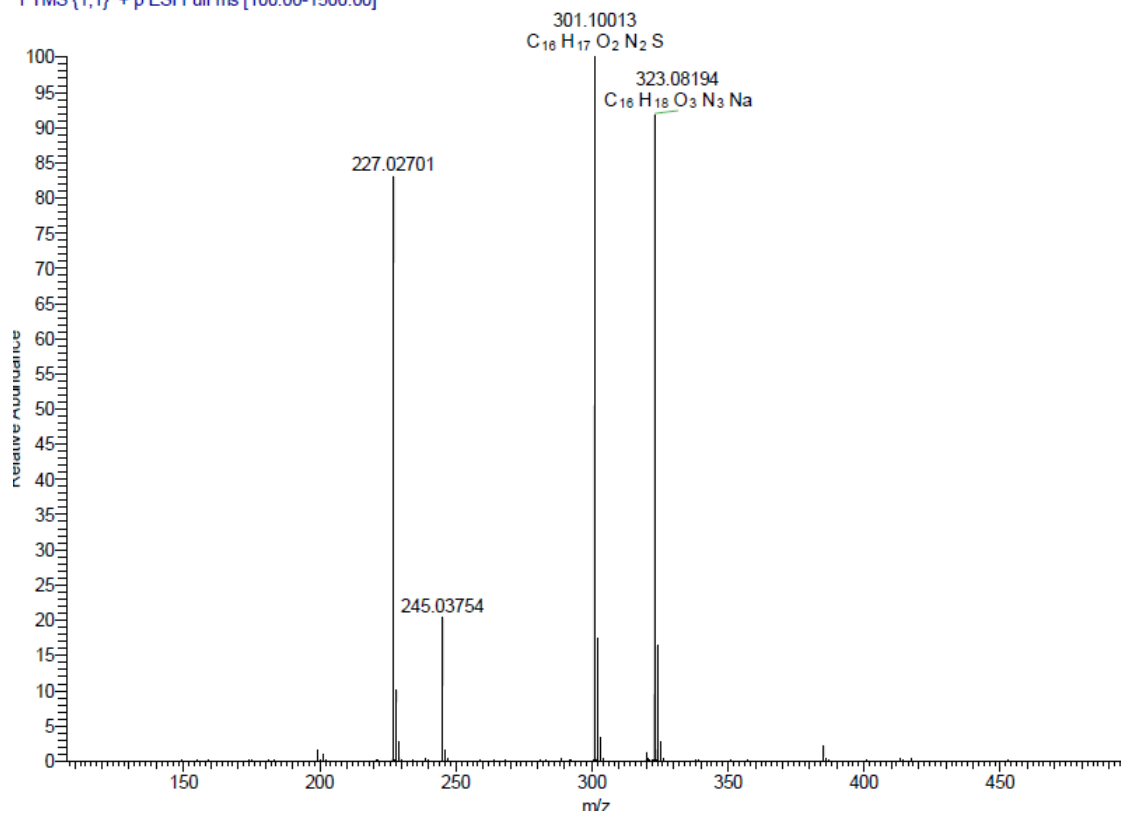

HRMS of 4z
